# Supplementary material
Source: PubMed Central journal article supplement (PMC2662564)
Supplement: JCI37630sd.pdf [file JCI37630sd.pdf]

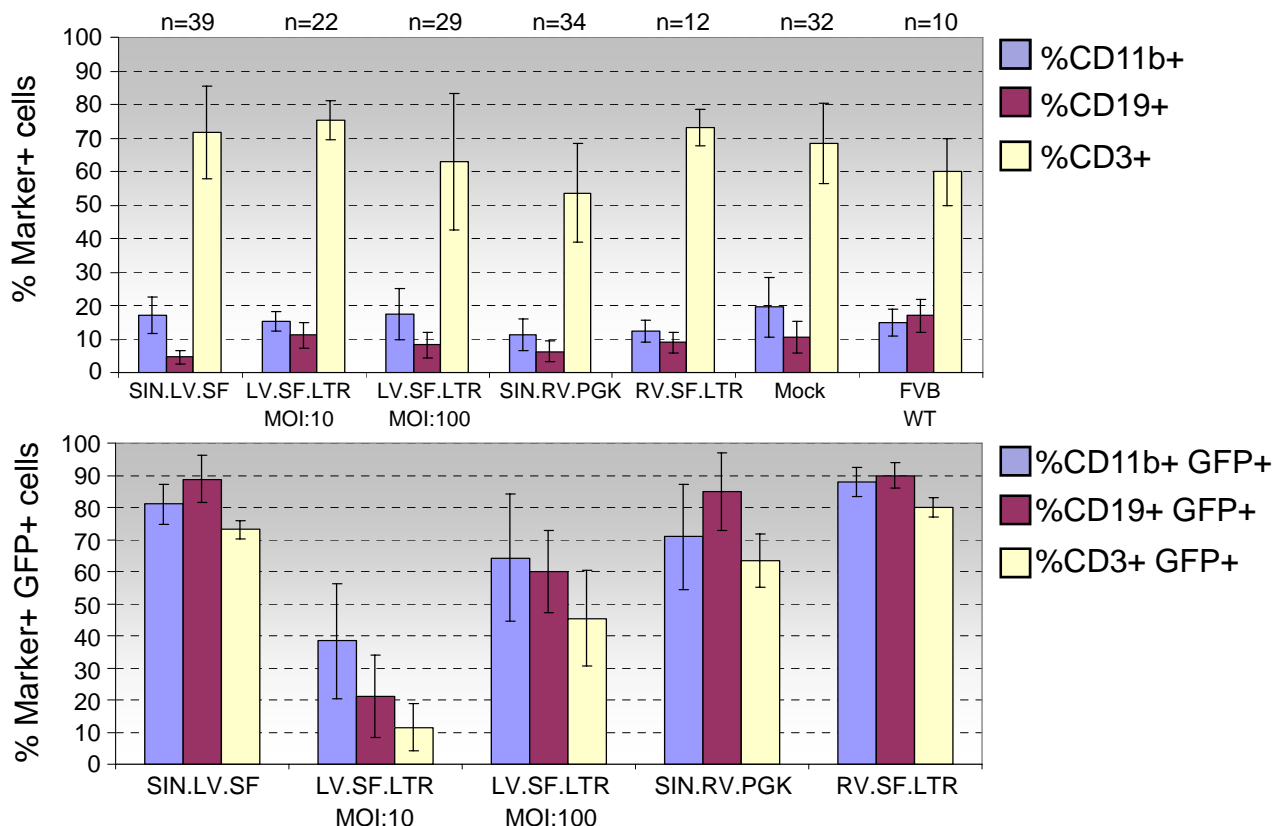

**Supplementary figure 1. Blood analysis of mice 6-8 weeks after transplant.** Percentage of total CD11b+, CD19+ and CD3+ cells (upper panel) and relative proportion of GFP+ cells in each blood lineage (lower panel) assessed by FACS analysis in the blood of mice of the different experimental groups, as indicated. n= number of mice.

A

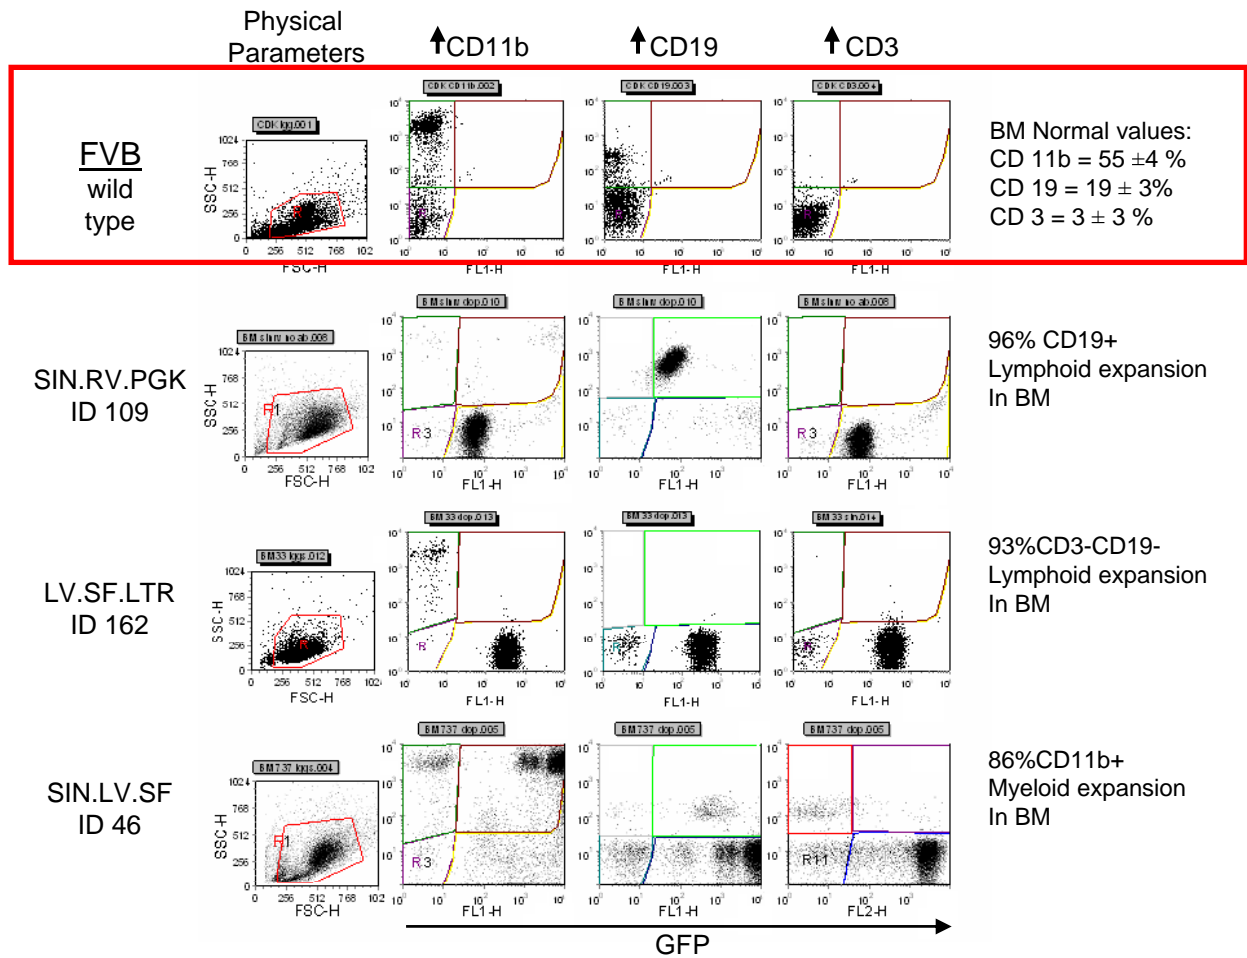

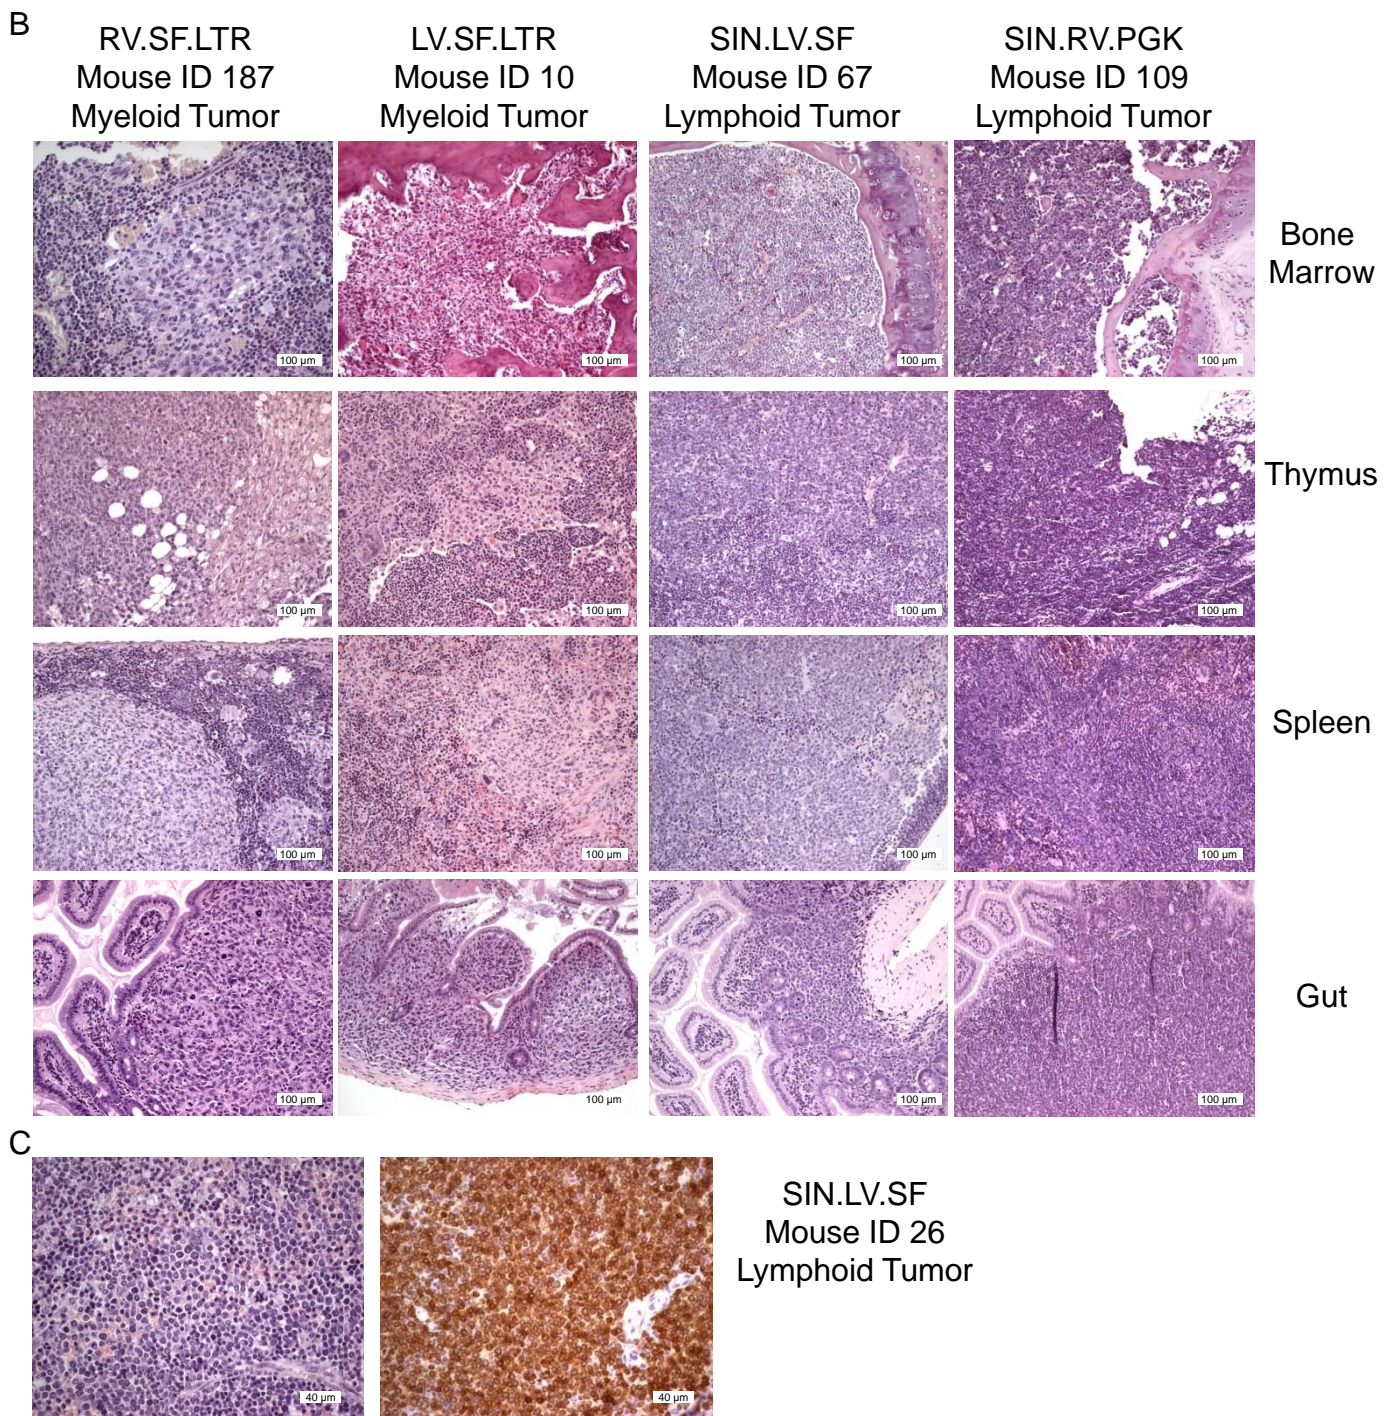

**Supplementary figure 2. Representative hematopoietic tumors developed in mice transplanted with transduced *Cdkn2a*<sup>-/-</sup> HSPCs**

**A)** Representative FACS analysis of bone marrow cells from a FVB wild-type (WT) mouse (first row) and tumor infiltrated bone marrow cells from mice transplanted with vector transduced *Cdkn2a*<sup>-/-</sup> cells. In column order, from left to right: physical parameters (SSC vs. FSC), CD11b (myeloid cells), CD19 (B-cells) and CD3 (T-cells) marking (y-axis) versus GFP (x-axis). Vector used and mouse ID are indicated on the left. Average of normal percentages of each lineage are shown on the right. For each pathological sample, marker and percentage of the expanded cell population is indicated.

**B)** Representative examples of hematoxylin and eosin-stained sections (20x magnifications) of the indicated organ, infiltrated by lymphoid or myeloid cells, as reported.

**C)** Hematoxylin and eosin-stained section of a splenic lymphoid neoplasia (left panel). Immunohistochemical analysis on a serial section of same tissue reveals cytoplasmic localization of CD3 antigen (right panel). 40x magnifications.

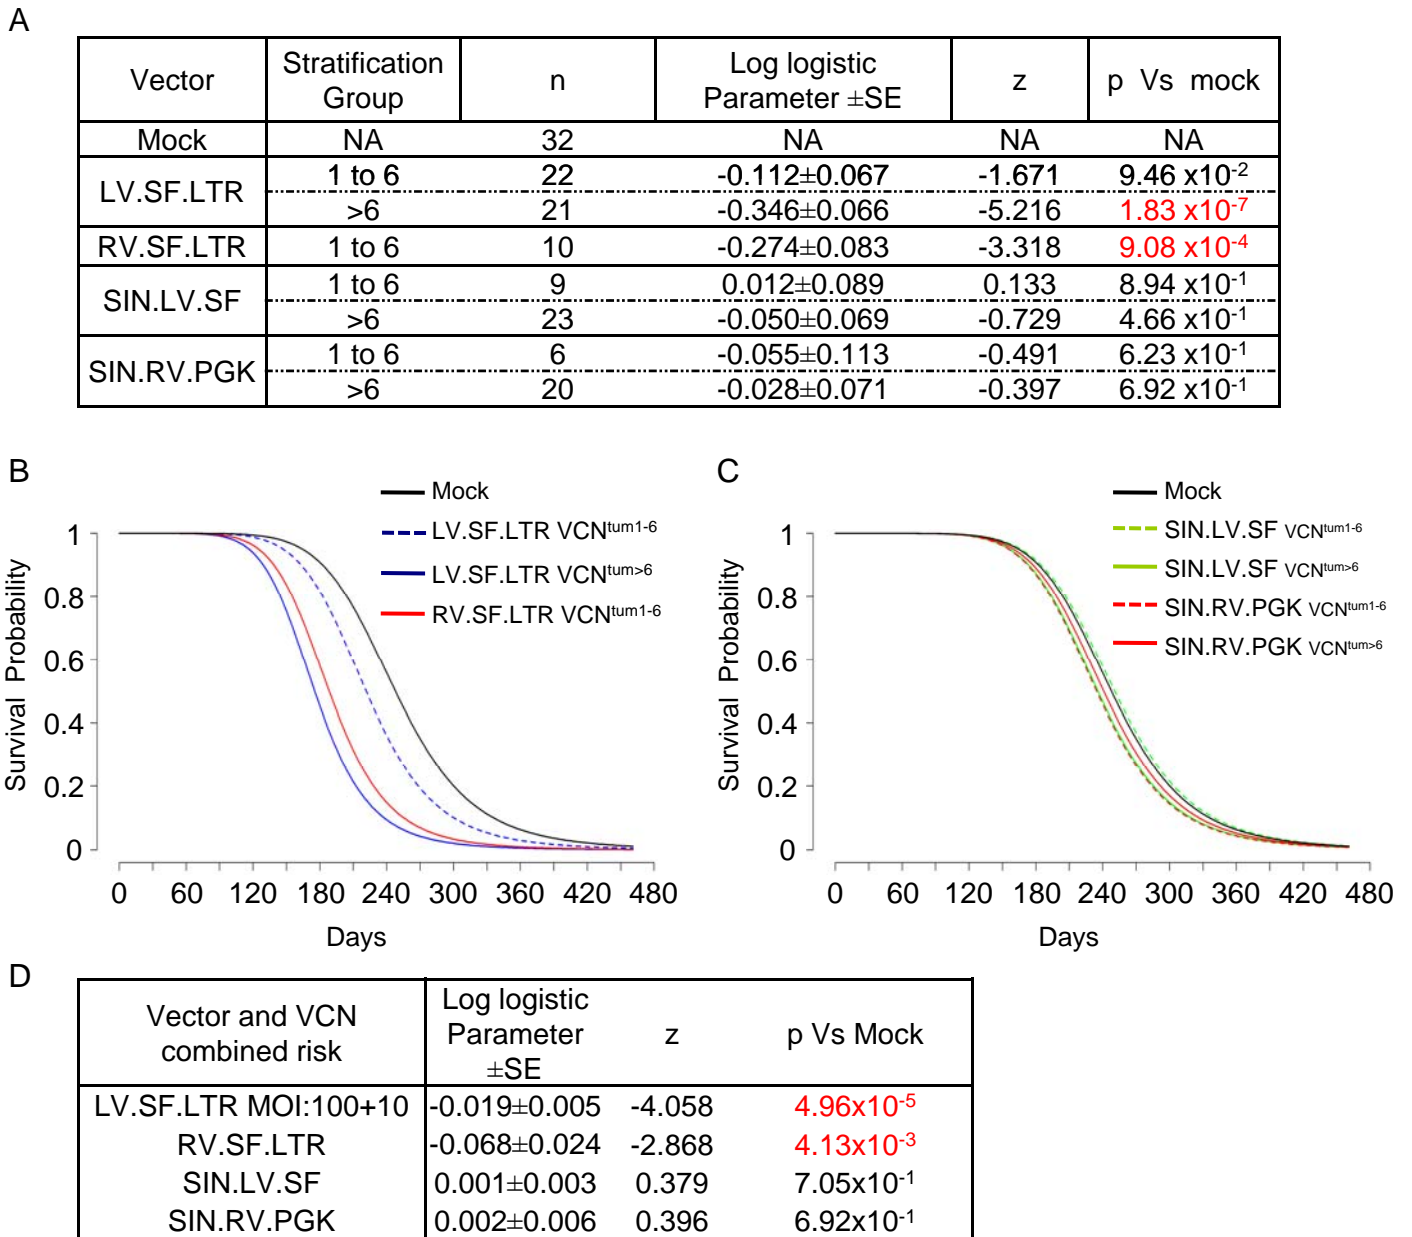

### Supplementary Figure 3. Log logistic accelerated failure time analysis of vector treatment groups stratified for VCN<sup>tum</sup>.

**A)** The log-logistic accelerated failure time model was used to evaluate the impact on the survival probability of all stratified ranging from 1 to 6 or VCN<sup>tum</sup> > 6 vector groups. (Vector and Stratification Group columns). The number of mice of each stratification group are indicated in the n column. LV.SF.LTR-VCN<sup>tum</sup>>6 and RV.SF.LTR-VCN<sup>tum</sup>1-6 show a negative impact on survival, as shown in the Log logistic Parameter values  $\pm$  SE (Standard Error) and z (Z scores) columns, and are significantly different than the Mock group (column p vs Mock,  $p < 0.05$  are highlighted in red). **B,C)** Survival probability over time of the VCN<sup>tum</sup> stratified groups for SF.LTR vectors (B) and SIN.LTR vectors (C) was estimated using the log logistic values of the accelerated failure time model shown in (A). **D)** Impact on survival of VCN<sup>tum</sup> using the log logistic accelerated failure time model using VCN<sup>tum</sup> and vector type as covariates. When LV.SF.LTR MOI:100 and MOI: 10 are pooled, the impact on the hazard of failure over time impact varies only slightly with respect to the impact of the LV.SF.LTR MOI:100 group alone (column p vs Mock; p values  $< 0.05$  shown in red), as shown by the negative value of the Log logistic Parameter ( $\pm$  SE, Standard Error) and z score (z).

A

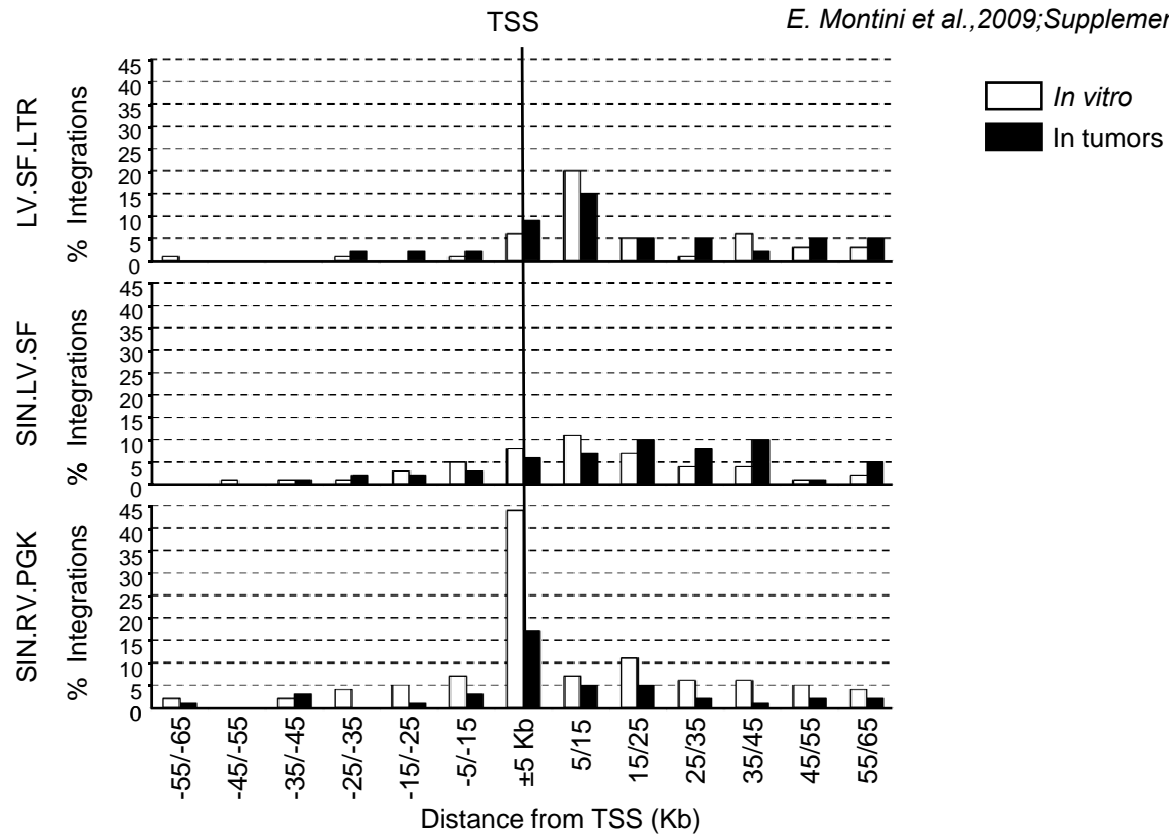

B

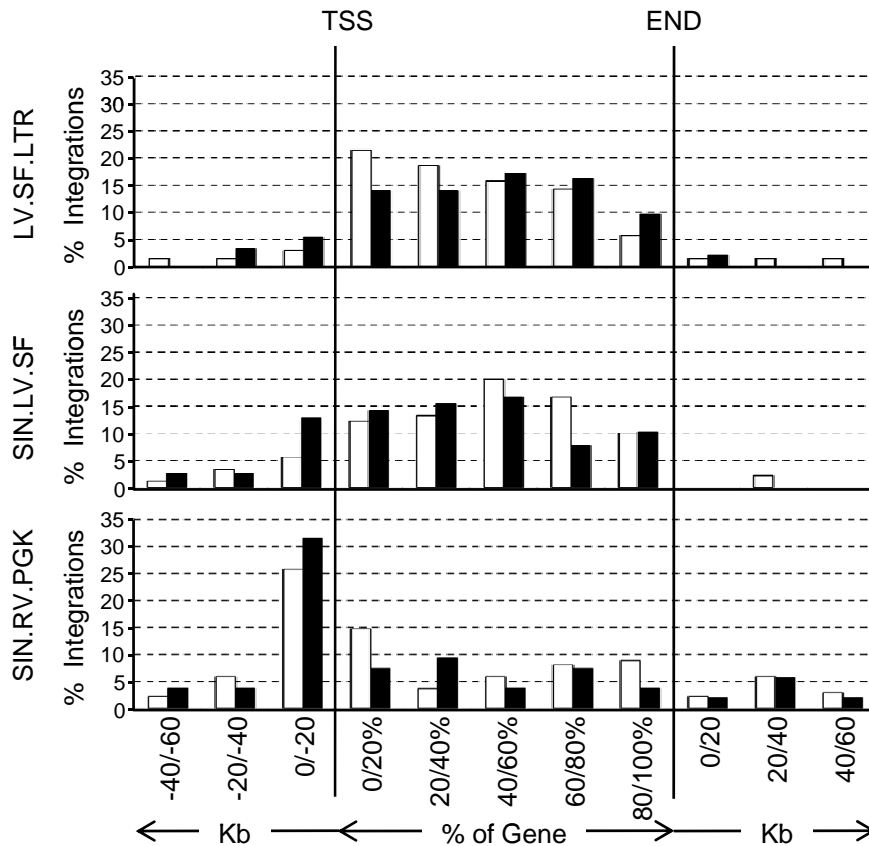

**Supplementary figure 4. Vector integration site analysis in cells before transplant and in tumors. A)** Integration frequency distribution around the TSS of LV.SF.LTR (upper panel), SIN.LV.SF (middle panel) and SIN.RV.PGK (lower panel) in *in vitro* (white bars) and in tumors (black bars). A 60-kb window centered on the TSS divided in 10-kb intervals is shown. **B)** Integration frequency distribution along the transcription unit (vector order as above). The length of each gene was normalized to 1 and divided in 5 intervals (each 20% of the gene size). Integrations upstream and downstream of genes are shown in 20-kb intervals.

A  
SIN.RV.PGK *in vitro*

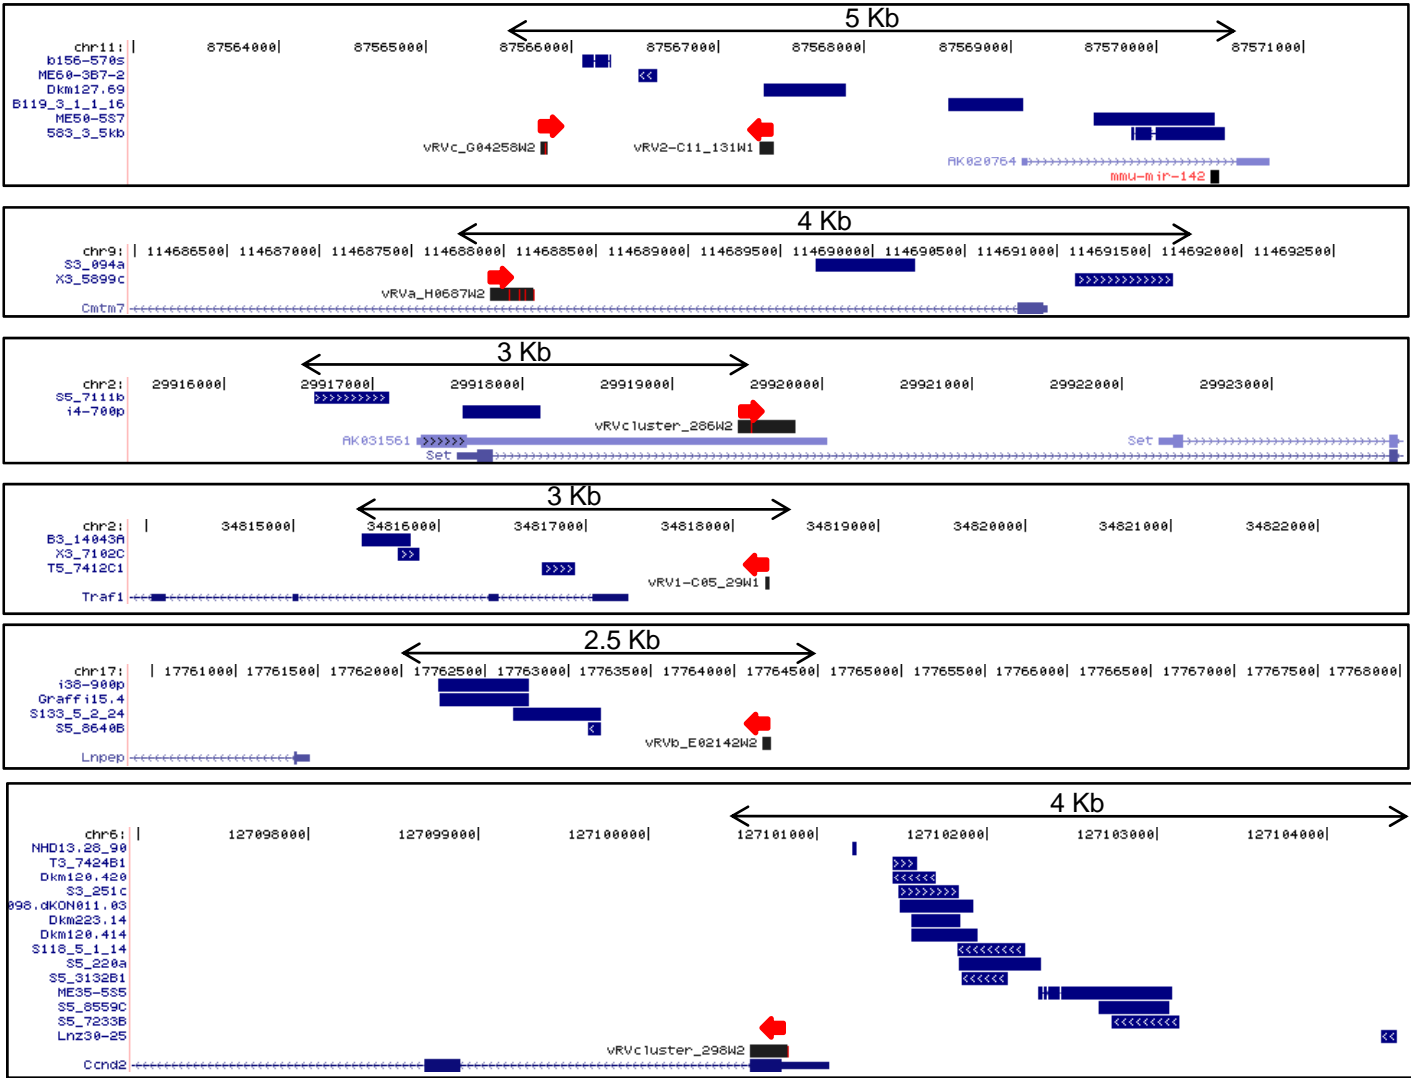

SIN.RV.PGK in tumors

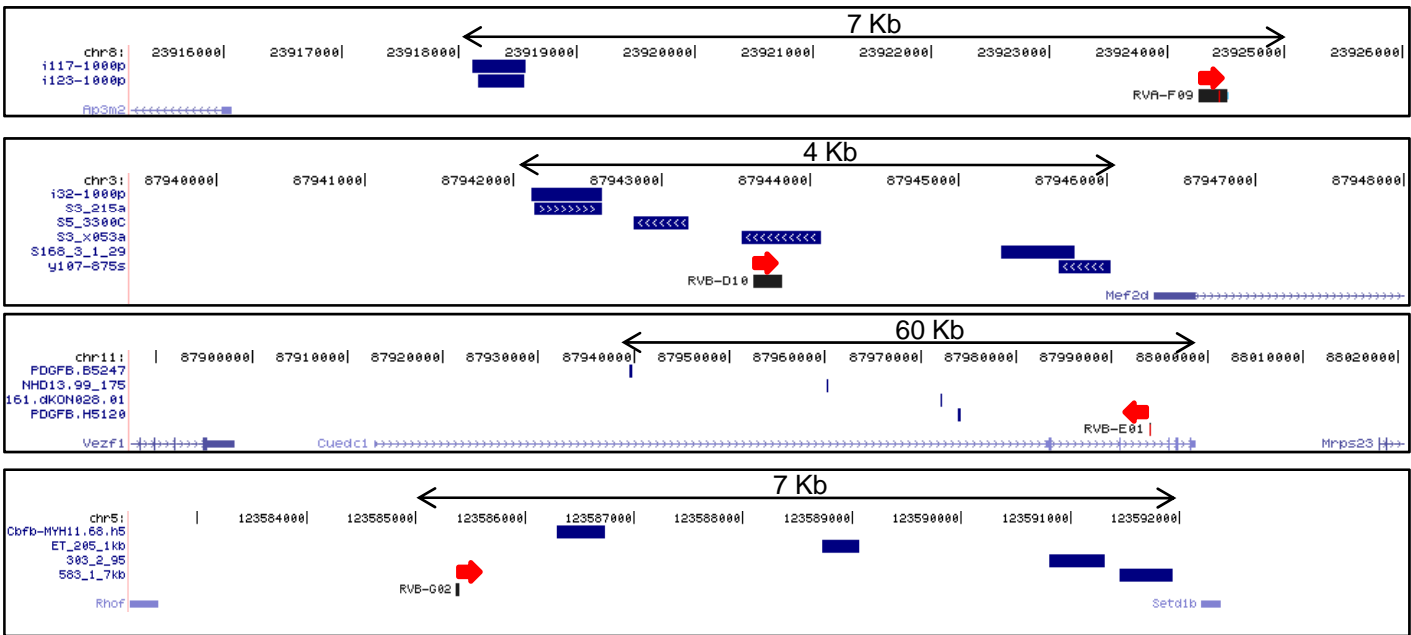

# B

## LV.SF.LTR *in vitro*

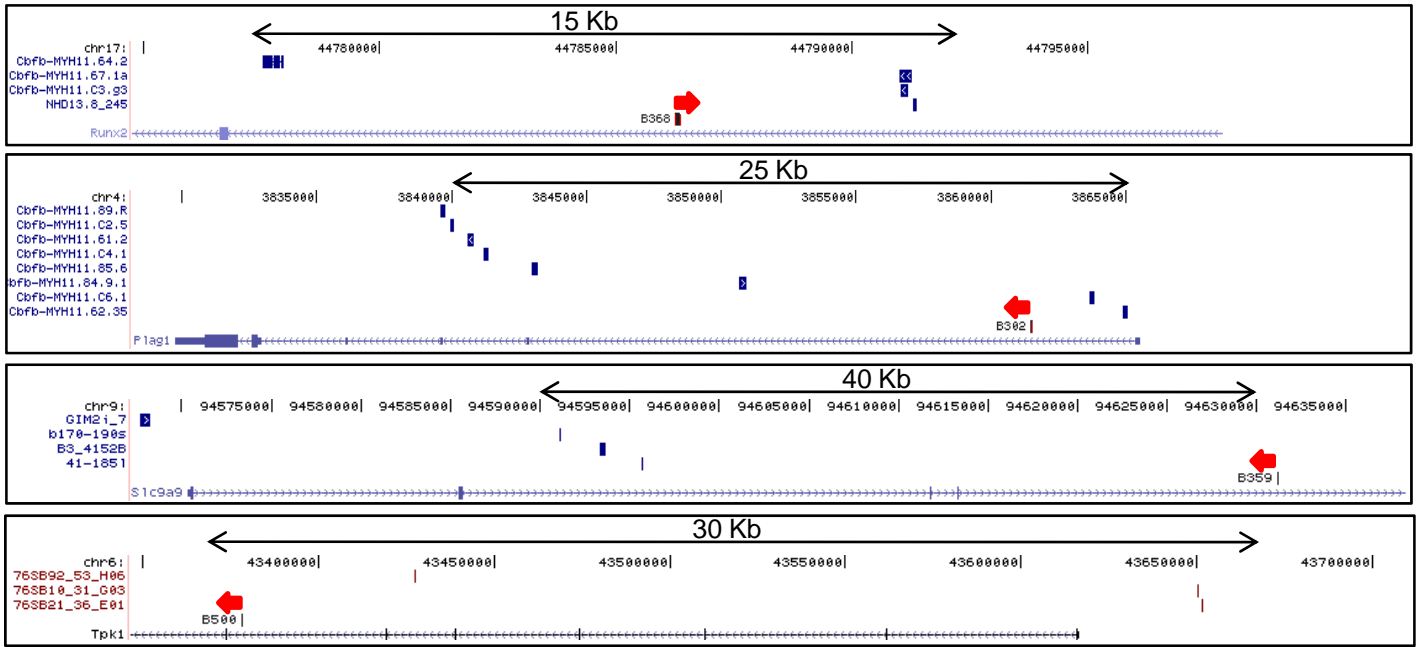

## LV.SF.LTR in tumors

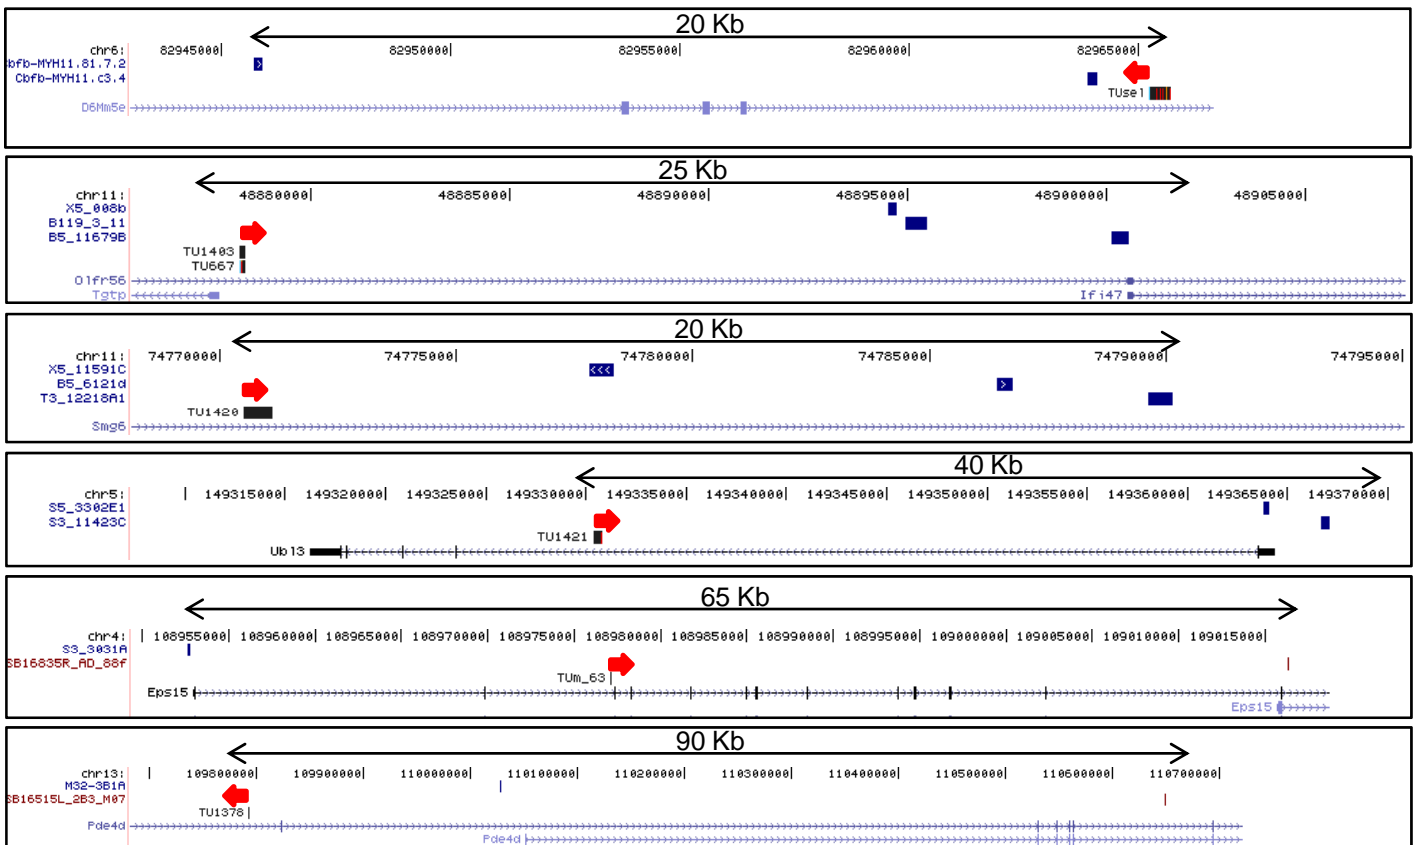

**Supplementary Figure 5:** Representative examples of SIN.RV.PGK and LV.SF.LTR integrations *in vitro* and in tumors at RTCGD CIS genes. UCSC BLAT output: chromosome number (Chr; top left): chromosomal coordinates (numbers on top); genes (bottom); vertical bars represent exons, the direction of transcription is indicated by the direction of the arrows on the genes) retroviral (blue) and Sleeping Beauty integrations (brown) are shown and identified on the left side, vector integrations are indicated by the red arrow (indicating the vector orientation). The minimum interval covering all integrations is shown (double headed arrow on top) **A)** SIN.RV.PGK integrations tend to map near RTCGD retroviral integrations, the interval containing SIN.RV.PGK and the RTCGD integrations is often <10 Kb; **B)** LV.SF.LTR integrations tend to target CIS genes. The interval of the integrations for this vector is often larger with respect to the SIN.RV.PGK intervals.

## Supplementary Statistical Methods

### A) Log Logistic Accelerated Failure Time Model

For survival analysis, a parametric approach was used because smooth continuous estimates of the survivor function were necessary for predictive purposes. The formula describing the log logistic distribution (Cox D.R and D Oakes, "Analysis of Survival Data", 1998, Chapman and Hall) is:

$(\rho^k kt^{k-1})/[1+(t\rho)^k]$  in which  $t$  is the time;  $\rho$  is risk of failure and  $k$  the log logistic parameter that determines the effect of the treatment. For further reference see Bradburn et al. "Survival Analysis Part II: Multivariate data analysis - an introduction to concepts and methods", British Journal of Cancer, 2003; 89: 431-436. Graphical examples of survival probability over time obtained by the log-logistic distribution (red lines) fitting the experimentally generated Kaplan Meier curves are shown below. Dashed lines represent the confidence intervals of each experimental curve.

HD: LV.SF.LTR MOI:100; LD: LV.SF.LTR MOI:10; 0: Mock.

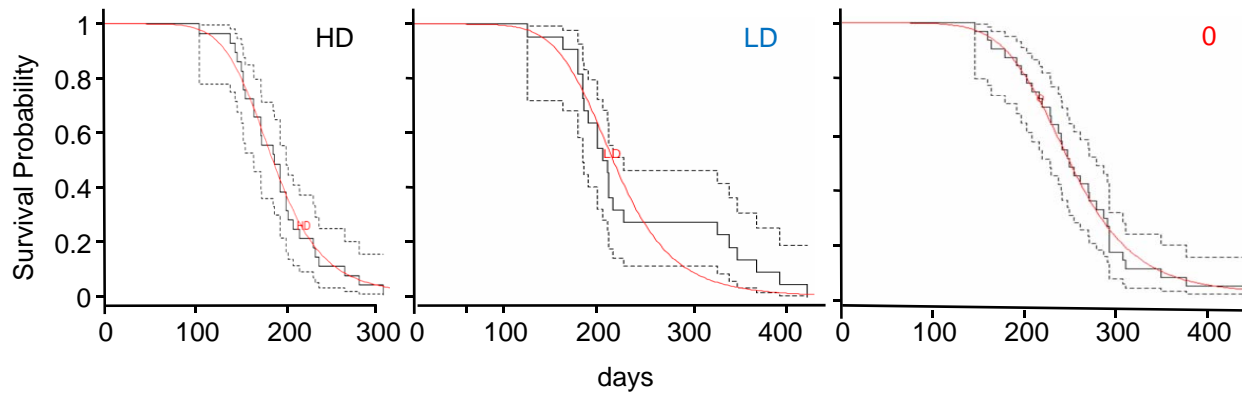

## B) $VCN^{tum}$ acts linearly on the log logistic hazard

We addressed whether the impact of the  $VCN^{tum}$  covariate within the accelerated failure time model was linear, quadratic, cubic impact. We first tested significance of each form of impact (see below). We then performed a comparison between these models by means of likelihood ratios and testing the null hypothesis of no models difference.

To compare models of different degree in terms of the information provided by the associated likelihood, models must be considered as nested (adding each degree progressively). Introducing a higher degree of impact (from 1 to 3) leads to an enlargement of the parameters set to be estimated, which starts with 6 parameters (linear impact or Degree 1), up to 18 parameters (Degree 3). To evaluate statistically the information provided both from increase of likelihood and increase of parameters, we chose the Akaike information criteria (AIC). The linear impact (model 1) has the lowest AIC, thus is preferred. Results are displayed below.

### MODEL 1 ( $VCN^{tum}$ ) (linear)

Log logistic distribution

**Loglik(model)= -1109.2** Loglik(intercept only)= -1127.2

Number of Newton-Raphson Iterations: 4

Chisq= **35.86** on 6 degrees of freedom,

**p=2.9e-06**

### MODEL 2 ( $VCN^{tum}^2$ ) (quadratic)

Log logistic distribution

**Loglik(model)= -1104.6** Loglik(intercept only)= -1127.2

Number of Newton-Raphson Iterations: 4

Chisq= **45.23** on 12 degrees of freedom,

**p=9.4e-06**

### MODEL3 ( $VCN^{tum}^3$ ) (cubic)

Log logistic distribution

**Loglik(model)= -1103.4** Loglik(intercept only)= -1127.2

Number of Newton-Raphson Iterations: 4

Chisq= **47.46** on 18 degrees of freedom,

**p=1.8e-04**

**Akaike's Information Criterion (AIC)** is  $-2 \cdot \log\text{-likelihood} + 2 \cdot k$  where  $k$  is the number of estimated parameters.

### MODEL 1

**AIC1=**  $-2 \cdot (-1109.12) + 2 \cdot 6 = 2230.24$

### MODEL 2

**AIC2=**  $-2 \cdot (-1104.6) + 2 \cdot 12 = 2233.2$

### MODEL 3

**AIC3=**  $-2 \cdot (-1103.4) + 2 \cdot 18 = 2242.8$

Model 1 (linear) has the lowest AIC

**Supplementary Table 1a**

| Vector (a) | MOI (b) | Mouse ID (c) | Status (d) | Cell Age Days (e) | Tumor VCN (f) | Tumor Type (g) | Bone Marrow (h) |      |       |      |      |      | Blood (i) |      |      |      | Spleen (l)   |      |       |      |      |      |
|------------|---------|--------------|------------|-------------------|---------------|----------------|-----------------|------|-------|------|------|------|-----------|------|------|------|--------------|------|-------|------|------|------|
|            |         |              |            |                   |               |                | Pathol diag.    | I.G. | CD11b | CD19 | CD3  | GFP  | CD11b     | CD19 | CD3  | GFP  | Pathol diag. | I.G. | CD11b | CD19 | CD3  | GFP  |
| LV.SF.LTR  | 100     | 4            | 1          | 105               | 8.1           | LY             | NT              | 0    | 79    | 81   | 10   | 7    | 34        | 49   | 34   | 32   | NT           | 0    | 21    | 70   | 20   | 30   |
| LV.SF.LTR  | 100     | 8            | 1          | 139               | 12.6          | LY-MY          | NT              | 0    | 85    | 5    | 12   | 2    | 48        | 23   | 7    | 26   | MY           | 1    | 41    | 37   | 12   | 26   |
| LV.SF.LTR  | 100     | 10           | 1          | 144               | 17.7          | MY             | MY              | 3    | 93    | 8    | -    | 19   | 67        | 26   | 25   | 19   | MY           | 2    | 82    | 30   | 15   | 14   |
| LV.SF.LTR  | 100     | 13           | 1          | 146               | 11.7          | LY             | LY              | 3    | 8     | 96   | 1    | 94   | 5         | 95   | 0    | 95   | LY           | 2    | 5     | 95   | 2    | 91   |
| LV.SF.LTR  | 100     | 14           | 1          | 151               | 10.3          | LY             | LY              | 3    | 8     | 94   | 0    | 96   | 11        | 91   | 0    | 96   | LY           | 3    | 6     | 96   | 1    | 95   |
| LV.SF.LTR  | 100     | 16           | 1          | 153               | 10.9          | LY             | NT              | 0    | 77    | 11   | 10   | 6    | 3         | 0    | 27   | 88   | LY           | 3    | 22    | 69   | 20   | 24   |
| LV.SF.LTR  | 100     | 161          | 1          | 153               | 7.5           | LY-MY          | -               | -    | 94.3  | 0.9  | 1.9  | 83.8 | -         | -    | -    | -    | NT           | 0    | -     | -    | -    | -    |
| LV.SF.LTR  | 100     | 153          | 1          | 155               | 8.1           | LY-MY          | -               | -    | 80.5  | 1.2  | 3.4  | 60.9 | 84.4      | 31.2 | 8.8  | 53.1 | LY           | 3    | 41.4  | 29.5 | 6.5  | 63.9 |
| LV.SF.LTR  | 100     | 22           | 1          | 164               | 9.4           | MY             | -               | -    | 82    | 7    | 4    | 9    | -         | -    | -    | -    | NT           | 0    | 18    | 64   | 24   | 33   |
| LV.SF.LTR  | 100     | 28           | 1          | 165               | 35.3          | LY             | LY              | 3    | 0     | 99   | 0    | 99   | 22        | 58   | 26   | 35   | LY           | 3    | 2     | 95   | 2    | 90   |
| LV.SF.LTR  | 100     | 163          | 1          | 172               | 5.3           | LY-MY          | MY              | 0-1  | 73.3  | 12.6 | 1.8  | 28.4 | 23.3      | 3.8  | 83.9 | 26.4 | NT           | 0    | 14.8  | 72.1 | 14.8 | 25.5 |
| LV.SF.LTR  | 100     | 164          | 1          | 172               | 11.2          | MY             | MY              | 2    | 87.8  | 5.9  | 4.6  | 86.8 | 73.2      | 9.5  | 9.7  | 82.8 | MY           | 3    | 72.9  | 21.6 | 13.8 | 49.7 |
| LV.SF.LTR  | 100     | 24           | 1          | 173               | 5.6           | LY-MY          | MY              | 3    | 64    | 24   | 14   | 35   | 42        | 29   | 2    | 37   | LY           | 3    | -     | -    | -    | -    |
| LV.SF.LTR  | 100     | 82           | 1          | 185               | 14.8          | LY-MY          | MY              | 3    | 69.2  | 28   | 2.6  | 46   | 1         | 0    | 22   | 1    | LY           | 3    | 14    | 61   | 6    | 27   |
| LV.SF.LTR  | 100     | 156          | 1          | 187               | 4.8           | LY             | NT              | 0    | 74.6  | 7.4  | 3.4  | 17.6 | 8.4       | 7.8  | 41.9 | 6.1  | LY           | 2    | 9.4   | 14.9 | 21.2 | 8.7  |
| LV.SF.LTR  | 100     | 32           | 1          | 193               | 11.4          | LY-MY          | MY              | 1    | 88    | 8    | 10   | 13   | 64        | 21   | 11   | 13   | NT           | 0    | 59    | 30   | 17   | 21   |
| LV.SF.LTR  | 100     | 154          | 1          | 193               | 7             | LY-MY          | NT              | 0    | 91    | 4.7  | 8    | 34.8 | -         | -    | -    | -    | MY           | 3    | 29    | 40.7 | 30.4 | 39.6 |
| LV.SF.LTR  | 100     | 155          | 1          | 193               | 13            | LY-MY          | MY              | 2    | 84.6  | 20.2 | 21.8 | 35.1 | -         | -    | -    | -    | MY           | 3    | 66.6  | 61.6 | 18.4 | 34.6 |
| LV.SF.LTR  | 100     | 159          | 1          | 200               | 7.3           | LY-MY          | LY              | 3    | 36.4  | 90.4 | 2.1  | 11.3 | -         | -    | -    | -    | LY           | 2    | 11.5  | 83.7 | 7.5  | 9.7  |
| LV.SF.LTR  | 100     | 160          | 1          | 200               | 10.2          | LY-MY          | NT              | 0    | 82.2  | 8.9  | 4.4  | 8.1  | -         | -    | -    | -    | LY-MY        | 3    | 30.1  | 37.6 | 24.2 | 34.1 |
| LV.SF.LTR  | 100     | 166          | 1          | 202               | 4.4           | LY-MY          | MY              | 2    | 63.9  | 66.7 | 2.2  | 18.2 | 46.5      | 48   | 10.5 | 22.5 | LY           | 3    | 15.4  | 85.2 | 4.1  | 24.9 |
| LV.SF.LTR  | 100     | 83           | 1          | 207               | 5             | LY             | LY              | 3    | 4     | 95   | 1    | 96   | 22        | 43   | 21   | 45   | LY           | 2-3  | 4     | 92   | 5    | 83   |
| LV.SF.LTR  | 100     | 81           | 1          | 214               | 12            | LY-MY          | MY              | 3    | 83    | 6    | 78   | 10   | 41        | 15   | 51   | 9    | MY           | 3    | 33    | 47   | 10   | 40   |

| Vector (a) | MOI (b) | Mouse ID (c) | Status (d) | Cell Age Days (e) | Tumor VCN (f) | Tumor Type (g) | Bone Marrow (h) |      |       |      |     |      | Blood (i) |      |      |      | Spleen (l)   |      |       |      |      |      |
|------------|---------|--------------|------------|-------------------|---------------|----------------|-----------------|------|-------|------|-----|------|-----------|------|------|------|--------------|------|-------|------|------|------|
|            |         |              |            |                   |               |                | Pathol diag.    | I.G. | CD11b | CD19 | CD3 | GFP  | CD11b     | CD19 | CD3  | GFP  | Pathol diag. | I.G. | CD11b | CD19 | CD3  | GFP  |
| LV.SF.LTR  | 100     | 84           | 1          | 229               | 16.8          | LY-MY          | MY              | 1-2  | 92    | 4    | 4   | 7    | 81        | 8    | 6    | 13   | MY           | 3    | 30    | 78   | 9    | 21   |
| LV.SF.LTR  | 100     | 85           | 1          | 231               | 3.9           | LY             | LY              | 3    | 2     | 98   | 0   | 1    | 29        | 12   | 2    | 88   | LY           | 2-3  | 3     | 93   | 3    | 9    |
| LV.SF.LTR  | 100     | 158          | 1          | 235               | 9             | LY             | NT              | 0    | 75.5  | 14.8 | 4.3 | 54.5 | -         | -    | -    | -    | NT           | 0    | -     | -    | -    | -    |
| LV.SF.LTR  | 100     | 157          | 1          | 263               | 3.3           | LY-MY          | MY              | 1    | 96.5  | 1.2  | 1.1 | 2.4  | 79.2      | 45.6 | 8.6  | 21.9 | NT           | 0    | 31.5  | 52.2 | 11   | 8.1  |
| LV.SF.LTR  | 100     | 165          | 1          | 279               | 6.2           | LY             | LY              | 3    | 25.1  | 0.4  | 0.1 | 99.8 | 42.2      | 1.9  | 0.3  | 98.5 | LY           | 2    | 10.7  | 3.2  | 0.6  | 96.9 |
| LV.SF.LTR  | 100     | 162          | 1          | 305               | 5             | LY             | LY              | 3    | 9.3   | 0.7  | 0.2 | 99.4 | 23.9      | 15   | 2.6  | 85.4 | LY           | 2    | 13.6  | 37.2 | 4.5  | 63.7 |
| LV.SF.LTR  | 10      | 143          | 1          | 126               | -             | ND             | -               | -    | -     | -    | -   | -    | -         | -    | -    | -    | -            | -    | -     | -    | -    | -    |
| LV.SF.LTR  | 10      | 148          | 1          | 165               | 0.9           | LY-MY          | LY              | 1    | 71.8  | 17   | 2.4 | 20.1 | 6.7       | 3.7  | 10.2 | 3.2  | LY           | 2    | 13.3  | 49   | 19.7 | 5    |
| LV.SF.LTR  | 10      | 6            | 1          | 181               | 1.2           | LY             | LY              | 1-2  | 9     | 90   | 7   | 89   | 18        | 65   | 15   | 69   | NT           | 0    | 11    | 79   | 16   | 65   |
| LV.SF.LTR  | 10      | 152          | 1          | 181               | 0.2           | LY             | LY              | 2    | 11.7  | 90.9 | 0.5 | 1.2  | 35.8      | 65.8 | 1.6  | 19.5 | LY           | 1-2  | 6.3   | 94.1 | 2.1  | 1.9  |
| LV.SF.LTR  | 10      | 145          | 1          | 187               | 0             | LY             | LY              | 3    | 7.4   | 97.9 | 1.2 | 0.4  | -         | -    | -    | -    | LY           | 3    | 7.5   | 88.1 | 2.6  | 2.5  |
| LV.SF.LTR  | 10      | 144          | 1          | 187               | 0.2           | MY             | MY              | 1    | 93.5  | 2.3  | 3.8 | 0.4  | 75.3      | 13.2 | 7.2  | 3.8  | NT           | 0    | 40.8  | 59.8 | 17.5 | 2.6  |
| LV.SF.LTR  | 10      | 7            | 1          | 188               | 1.3           | LY-MY          | MY              | 3    | 94    | 12   | 17  | 11   | 55        | 41   | 22   | 21   | MY           | 3    | 49    | 37   | 39   | 18   |
| LV.SF.LTR  | 10      | 147          | 1          | 193               | 0.1           | LY-MY          | LY              | 3    | 11.4  | 97.1 | 0.9 | 0.5  | 34.3      | 74.1 | 1    | 7.3  | LY           | 3    | 2.5   | 96.7 | 1.3  | 1.4  |
| LV.SF.LTR  | 10      | 150          | 1          | 202               | 1.2           | LY             | NT              | 0    | 68.8  | 19.5 | 4   | 20.3 | 8.4       | 2.8  | 55.3 | 16.4 | NT           | 0    | 24.6  | 62.1 | 19   | 10.2 |
| LV.SF.LTR  | 10      | 149          | 1          | 202               | 2.2           | LY-MY          | LY              | 2    | 20.1  | 78.8 | 0.8 | 86.8 | 35.8      | 53.5 | 7.5  | 63.1 | LY           | 2    | 10.8  | 84.5 | 5    | 78.9 |
| LV.SF.LTR  | 10      | 142          | 1          | 208               | 0             | LY             | LY              | 3    | 2.9   | 96.9 | 0.5 | 0.5  | 18.9      | 70.6 | 6.6  | 23.2 | LY           | 3    | 3.2   | 93.3 | 1.5  | 1.9  |
| LV.SF.LTR  | 10      | 18           | 1          | 214               | 1.2           | MY             | NT              | 0    | 97    | 1    | 3   | 36   | 87        | 7    | 6    | 52   | MY           | 3    | 72    | 52   | 18   | 21   |
| LV.SF.LTR  | 10      | 141          | 1          | 215               | 0.5           | LY             | LY              | 3    | 12.6  | 88   | 0.9 | 0.6  | 69.8      | 64.5 | 6.2  | 12.5 | LY           | 3    | 61.4  | 93.7 | 2.4  | 1.8  |
| LV.SF.LTR  | 10      | 151          | 1          | 215               | 1.6           | LY-MY          | NT              | 0    | 92.9  | 2.9  | 5   | 17.7 | 27.3      | 8.5  | 14.9 | 36.7 | MY           | 3    | 35.6  | 46.6 | 11.6 | 22   |
| LV.SF.LTR  | 10      | 21           | 1          | 220               | 1.4           | MY             | NT              | 0    | 81    | 7    | 4   | 12   | 59        | 20   | 22   | 24   | MY           | 3    | 43    | 58   | 12   | 3    |
| LV.SF.LTR  | 10      | 140          | 1          | 231               | 0.9           | MY             | MY              | 0-1  | -     | -    | -   | -    | -         | -    | -    | -    | -            | -    | -     | -    | -    | -    |
| LV.SF.LTR  | 10      | 146          | 1          | 334               | 0             | LY-MY          | LY              | 3    | 8.5   | 98.6 | 0.5 | 0.2  | 18        | 73.3 | 0.5  | 3    | LY           | 2    | 2.6   | 93.6 | 0.5  | 0.6  |
| LV.SF.LTR  | 10      | 72           | 1          | 347               | 1.4           | LY             | -               | -    | 2.2   | 97.2 | 0.4 | 0.4  | -         | -    | -    | -    | -            | -    | -     | -    | -    | -    |

| Vector (a) | MOI (b) | Mouse ID (c) | Status (d) | Cell Age Days (e) | Tumor VCN (f) | Tumor Type (g) | Bone Marrow (h) |      |       |      |     |      | Blood (i) |      |      |      | Spleen (l)   |      |       |      |      |      |
|------------|---------|--------------|------------|-------------------|---------------|----------------|-----------------|------|-------|------|-----|------|-----------|------|------|------|--------------|------|-------|------|------|------|
|            |         |              |            |                   |               |                | Pathol diag.    | I.G. | CD11b | CD19 | CD3 | GFP  | CD11b     | CD19 | CD3  | GFP  | Pathol diag. | I.G. | CD11b | CD19 | CD3  | GFP  |
| LV.SF.LTR  | 10      | 73           | 1          | 356               | 5.3           | LY-MY          | MY              | 1    | 16.8  | 71.7 | 2.2 | 68.3 | -         | -    | -    | -    | MY           | 3    | 42.1  | 71   | 15.8 | 40   |
| LV.SF.LTR  | 10      | 74           | 1          | 377               | 1.7           | LY-MY          | MY              | 3    | 85.4  | 9.1  | 8.6 | 34.8 | 75.6      | 12.3 | 8.7  | 57.7 | MY           | 3    | -     | -    | -    | -    |
| LV.SF.LTR  | 10      | 71           | 1          | 402               | -             | ND             | -               | -    | -     | -    | -   | -    | -         | -    | -    | -    | -            | -    | -     | -    | -    | -    |
| LV.SF.LTR  | 10      | 70           | 1          | 432               | 2.6           | LY-MY          | NT              | 0    | 61.7  | 3.4  | 5.1 | 62.9 | 36.2      | 10   | 40.4 | 58.7 | NT           | 0    | 21.4  | 34.6 | 24.6 | 36.2 |
| Mock       | -       | 2            | 1          | 146               | -             | LY-MY          | MY              | 2    | 87.7  | 5.8  | 21  | 0    | 4         | 5    | 15   | 0    | MY           | 2    | 56    | 32   | 20   | 0    |
| Mock       | -       | 27           | 1          | 160               | 0             | LY             | LY              | 3    | 4     | 92   | 0   | 0    | 14        | 83   | 3    | 0    | LY           | 3    | 7     | 95   | 1    | 0    |
| Mock       | -       | 130          | 1          | 164               | -             | ND             | -               | -    | -     | -    | -   | -    | -         | -    | -    | -    | -            | -    | -     | -    | -    | -    |
| Mock       | -       | 29           | 1          | 179               | -             | LY             | LY              | 1-2  | 6     | 94   | 0   | 0    | 40        | 66   | 3    | 0    | LY           | 1    | 10    | 88   | 4    | 0    |
| Mock       | -       | 31           | 1          | 192               | -             | ND             | -               | -    | -     | -    | -   | -    | -         | -    | -    | -    | -            | -    | -     | -    | -    | -    |
| Mock       | -       | 170          | 1          | 197               | -             | LY             | LY              | 3    | 16.8  | 83   | 0.5 | 0    | 22.3      | 78.2 | 1.7  | 0    | LY           | 2    | 10    | 86.5 | 3.7  | 0    |
| Mock       | -       | 128          | 1          | 203               | -             | LY-MY          | MY              | 3    | -     | -    | -   | -    | -         | -    | -    | -    | LY           | 3    | -     | -    | -    | -    |
| Mock       | -       | 135          | 1          | 209               | -             | LY             | LY              | 2    | 33.7  | 88.2 | 6.4 | 0    | -         | -    | -    | -    | LY           | 3    | -     | -    | -    | -    |
| Mock       | -       | 126          | 1          | 216               | -             | LY             | LY              | 3    | -     | -    | -   | -    | -         | -    | -    | -    | LY           | 3    | -     | -    | -    | -    |
| Mock       | -       | 139          | 1          | 219               | -             | ND             | -               | -    | -     | -    | -   | -    | -         | -    | -    | -    | -            | -    | -     | -    | -    | -    |
| Mock       | -       | 169          | 1          | 228               | -             | LY             | LY              | 3    | -     | -    | -   | -    | -         | -    | -    | -    | LY           | 3    | -     | -    | -    | -    |
| Mock       | -       | 124          | 1          | 229               | -             | LY-MY          | NT              | 0    | 70    | 17   | 4   | 0    | 43        | 28   | 31   | 0    | MY           | 3    | 23    | 62   | 20   | 0    |
| Mock       | -       | 131          | 1          | 237               | -             | MY             | NT              | 0    | 90    | 3.2  | 5.5 | 0    | -         | -    | -    | -    | -            | -    | -     | -    | -    | -    |
| Mock       | -       | 129          | 1          | 240               | -             | LY-MY          | MY              | 0-1  | 43.9  | 11.1 | 6.5 | 0    | -         | -    | -    | -    | LY           | 2    | -     | -    | -    | -    |
| Mock       | -       | 168          | 1          | 241               | -             | LY             | -               | -    | 1.4   | 93   | 0.3 | 0    | -         | -    | -    | -    | LY           | 2    | -     | -    | -    | -    |
| Mock       | -       | 125          | 1          | 247               | -             | ND             | -               | -    | -     | -    | -   | -    | -         | -    | -    | -    | -            | -    | -     | -    | -    | -    |
| Mock       | -       | 167          | 1          | 249               | -             | LY             | LY              | 3    | 3.1   | 94.7 | 1.1 | 0    | -         | -    | -    | -    | LY           | 3    | -     | -    | -    | -    |
| Mock       | -       | 127          | 1          | 254               | -             | LY-MY          | NT              | 0    | 40.3  | 47.6 | 2.3 | 0    | -         | -    | -    | -    | MY           | 1    | -     | -    | -    | -    |
| Mock       | -       | 120          | 1          | 261               | -             | ND             | -               | -    | -     | -    | -   | -    | -         | -    | -    | -    | -            | -    | -     | -    | -    | -    |
| Mock       | -       | 117          | 1          | 270               | -             | LY             | LY              | 3    | 5     | 94   | 0   | 0    | -         | -    | -    | 0    | LY           | 3    | 3     | 90   | 3    | 0    |

| Vector (a) | MOI<br>(b) | Mouse<br>ID (c) | Status<br>(d) | Cell<br>Age<br>Days<br>(e) | Tumor<br>VCN<br>(f) | Tumor<br>Type (g) | Bone Marrow (h) |      |       |      |      |      | Blood (i) |      |     |      | Spleen (l)      |      |       |      |     |      |
|------------|------------|-----------------|---------------|----------------------------|---------------------|-------------------|-----------------|------|-------|------|------|------|-----------|------|-----|------|-----------------|------|-------|------|-----|------|
|            |            |                 |               |                            |                     |                   | Pathol<br>diag. | I.G. | CD11b | CD19 | CD3  | GFP  | CD11b     | CD19 | CD3 | GFP  | Pathol<br>diag. | I.G. | CD11b | CD19 | CD3 | GFP  |
| Mock       | -          | 121             | 1             | 271                        | -                   | MY                | -               | -    | 94    | 1    | 3    | 0    | 52        | 30   | 21  | 0    | MY              | 3    | -     | -    | -   | -    |
| Mock       | -          | 138             | 1             | 279                        | -                   | LY                | LY              | 1    | 67.9  | 0.5  | 8.5  | 0    | -         | -    | -   | -    | LY              | 3    | -     | -    | -   | -    |
| Mock       | -          | 137             | 1             | 287                        | -                   | LY                | NT              | 0    | 43.2  | 24.8 | 12.1 | 0    | -         | -    | -   | -    | NT              | 0    | 13.6  | 68.3 | 9.8 | 0    |
| Mock       | -          | 115             | 1             | 291                        | -                   | LY                | LY              | 3    | 3     | 98   | 1    | 0    | 4         | 98   | 1   | 0    | LY              | 3    | -     | -    | -   | -    |
| Mock       | -          | 136             | 1             | 293                        | -                   | LY                | LY              | 3    | 11.1  | 90.5 | 10.9 | 0    | -         | -    | -   | -    | LY              | 3    | 6     | 82.9 | 5.2 | 0    |
| Mock       | -          | 133             | 1             | 293                        | -                   | ND                | -               | -    | -     | -    | -    | -    | -         | -    | -   | -    | -               | -    | -     | -    | -   | -    |
| Mock       | -          | 134             | 1             | 293                        | -                   | ND                | -               | -    | -     | -    | -    | -    | -         | -    | -   | -    | -               | -    | -     | -    | -   | -    |
| Mock       | -          | 118             | 1             | 307                        | -                   | ND                | -               | -    | -     | -    | -    | -    | -         | -    | -   | -    | -               | -    | -     | -    | -   | -    |
| Mock       | -          | 119             | 1             | 310                        | -                   | ND                | -               | -    | -     | -    | -    | -    | -         | -    | -   | -    | -               | -    | -     | -    | -   | -    |
| Mock       | -          | 122             | 1             | 349                        | -                   | ND                | -               | -    | -     | -    | -    | -    | -         | -    | -   | -    | -               | -    | -     | -    | -   | -    |
| Mock       | -          | 116             | 1             | 377                        | -                   | ND                | -               | -    | -     | -    | -    | -    | -         | -    | -   | -    | -               | -    | -     | -    | -   | -    |
| Mock       | -          | 123             | 1             | 440                        | -                   | ND                | -               | -    | -     | -    | -    | -    | -         | -    | -   | -    | -               | -    | -     | -    | -   | -    |
| RV.SF.LTR  | 100        | 191             | 1             | 116                        | 4                   | LY                | LY              | 0-1  | -     | -    | -    | -    | -         | -    | -   | -    | LY              | 2    | -     | -    | -   | -    |
| RV.SF.LTR  | 100        | 192             | 1             | 158                        | 4.3                 | LY                | LY              | 3    | 2.3   | 97.1 | 0.4  | 99.5 | 34.5      | 45.8 | 11  | 92.2 | LY              | 3    | 3.3   | 89   | 2.1 | 96.1 |
| RV.SF.LTR  | 100        | 195             | 1             | 170                        | 3.1                 | LY                | LY              | 3    | 1.3   | 98.9 | 0.4  | 98.9 | -         | -    | -   | -    | LY              | 3    | 1.9   | 95.1 | 1.6 | 89.3 |
| RV.SF.LTR  | 100        | 188             | 1             | 185                        | 1.5                 | LY                | LY              | 2-3  | 1.3   | 93.1 | 0.3  | 96.6 | -         | -    | -   | -    | LY              | 1    | 3.8   | 80.5 | 3   | 87   |
| RV.SF.LTR  | 100        | 187             | 1             | 192                        | 1.7                 | MY                | MY              | 1    | 88.1  | 2    | 1.2  | 81.9 | -         | -    | -   | -    | MY              | 3    | 34.1  | 40.7 | 5.6 | 80   |
| RV.SF.LTR  | 100        | 190             | 1             | 192                        | 5.6                 | MY                | MY              | 2    | 90.2  | 0.4  | 0.1  | 99.3 | 79.3      | 3.7  | 0.8 | 97.7 | MY              | 3    | 74.8  | 14.3 | 2.3 | 92.8 |
| RV.SF.LTR  | 100        | 185             | 1             | 197                        | 2.6                 | LY                | LY              | 3    | 2.8   | 97.9 | 0.3  | 97.2 | -         | -    | -   | -    | LY              | 2    | 7.5   | 94.4 | 1.3 | 91.8 |
| RV.SF.LTR  | 100        | 189             | 1             | 205                        | 4.2                 | LY-MY             | LY              | 3    | 4.1   | 94.1 | 0.3  | 93.3 | -         | -    | -   | -    | LY              | 3    | 5.5   | 92.9 | 0.7 | 95.2 |
| RV.SF.LTR  | 100        | 194             | 1             | 221                        | 1.5                 | LY                | LY              | 3    | 15.9  | 98   | 0.3  | 0.7  | -         | -    | -   | -    | LY              | 2    | 20.5  | 96.6 | 0.6 | 2.7  |
| RV.SF.LTR  | 100        | 186             | 1             | 255                        | 2.4                 | MY                | MY              | 3    | 64.6  | 22.2 | 1.9  | 69.2 | 81.8      | 19   | 2.2 | 90.2 | MY              | 3    | 39.5  | 52.8 | 2.7 | 79.5 |
| RV.SF.LTR  | 100        | 184             | 1             | 354                        | -                   | ND                | -               | -    | -     | -    | -    | -    | -         | -    | -   | -    | -               | -    | -     | -    | -   | -    |
| RV.SF.LTR  | 100        | 193             | 1             | 354                        | -                   | ND                | -               | -    | -     | -    | -    | -    | -         | -    | -   | -    | -               | -    | -     | -    | -   | -    |

| Vector (a) | MOI (b) | Mouse ID (c) | Status (d) | Cell Age Days (e) | Tumor VCN (f) | Tumor Type (g) | Bone Marrow (h) |      |       |      |      |      | Blood (i) |      |     |      | Spleen (l)   |      |       |      |      |      |
|------------|---------|--------------|------------|-------------------|---------------|----------------|-----------------|------|-------|------|------|------|-----------|------|-----|------|--------------|------|-------|------|------|------|
|            |         |              |            |                   |               |                | Pathol diag.    | I.G. | CD11b | CD19 | CD3  | GFP  | CD11b     | CD19 | CD3 | GFP  | Pathol diag. | I.G. | CD11b | CD19 | CD3  | GFP  |
| SIN.LV.SF  | 100     | 68           | 1          | 133               | -             | ND             | -               | -    | -     | -    | -    | -    | -         | -    | -   | -    | -            | -    | -     | -    | -    | -    |
| SIN.LV.SF  | 100     | 1            | 1          | 146               | 11.9          | LY             | NT              | 0    | 67.6  | 13.8 | 6    | 50   | 8         | 0    | 2   | 11   | LY           | 0-1  | 15    | 56   | 18   | 60   |
| SIN.LV.SF  | 100     | 64           | 1          | 153               | -             | ND             | -               | -    | -     | -    | -    | -    | -         | -    | -   | -    | -            | -    | -     | -    | -    | -    |
| SIN.LV.SF  | 100     | 3            | 1          | 161               | 17.3          | LY             | LY              | 3    | 0     | 98   | 0    | 99   | 5         | 93   | 28  | 97   | LY           | 1    | 2     | 90   | 0    | 94   |
| SIN.LV.SF  | 100     | 55           | 1          | 162               | 10.5          | LY             | LY              | 3    | 4     | 96   | 0    | 99   | 19        | 80   | 0   | 97   | LY           | 1-2  | 4     | 91   | 1    | 96   |
| SIN.LV.SF  | 100     | 60           | 1          | 162               | 11.1          | LY             | NT              | 0    | 79    | 11   | 1    | 71   | 3         | 3    | 1   | 39   | LY           | 3    | 11    | 25   | 2    | 30   |
| SIN.LV.SF  | 100     | 23           | 1          | 171               | 9.3           | LY             | LY              | 3    | 11    | 89   | 0    | 91   | 6         | 95   | 0   | 94   | LY           | 0-1  | 6     | 87   | 2    | 87   |
| SIN.LV.SF  | 100     | 26           | 1          | 174               | 4.4           | LY             | LY              | 3    | 5     | 0    | 0    | 94   | 16        | 7    | 8   | 65   | LY           | 3    | 4     | 14   | 2    | 87   |
| SIN.LV.SF  | 100     | 52           | 1          | 184               | -             | MY             | MY              | 1    | -     | -    | -    | -    | -         | -    | -   | -    | MY           | 3    | -     | -    | -    | -    |
| SIN.LV.SF  | 100     | 61           | 1          | 192               | 12            | LY             | LY              | 0-1  | 74    | 13   | 6    | 68   | 3         | 1    | 54  | 99   | LY           | 1    | 11    | 69   | 23   | 76   |
| SIN.LV.SF  | 100     | 63           | 1          | 192               | 12.5          | LY-MY          | MY              | 1    | 90    | 1    | 7    | 67   | 37        | 21   | 45  | 84   | LY           | 1    | 27    | 34   | 36   | 68   |
| SIN.LV.SF  | 100     | 66           | 1          | 194               | 10.4          | LY             | LY              | 2-3  | 3     | 2    | 15   | 94   | 10        | 19   | 15  | 83   | LY           | 3    | 0     | 10   | 30   | 91   |
| SIN.LV.SF  | 100     | 59           | 1          | 212               | 4.4           | LY             | -               | -    | -     | -    | -    | -    | -         | -    | -   | -    | LY           | 3    | -     | -    | -    | -    |
| SIN.LV.SF  | 100     | 17           | 1          | 214               | 5             | LY-MY          | MY              | 3    | 61    | 45   | 4    | 81   | 56        | 6    | 33  | 78   | MY           | 3    | 63    | 34   | 31   | 64   |
| SIN.LV.SF  | 100     | 69           | 1          | 217               | -             | ND             | -               | -    | -     | -    | -    | -    | -         | -    | -   | -    | -            | -    | -     | -    | -    | -    |
| SIN.LV.SF  | 100     | 25           | 1          | 230               | 1.5           | LY             | LY              | 3    | 1     | 98   | 0    | 99   | 16        | 46   | 7   | 65   | LY           | 3    | 1     | 93   | 2    | 95   |
| SIN.LV.SF  | 100     | 40           | 1          | 230               | 17.1          | ND             | NT              | 0    | -     | -    | -    | -    | -         | -    | -   | -    | NT           | 0    | -     | -    | -    | -    |
| SIN.LV.SF  | 100     | 67           | 1          | 231               | 18.2          | LY             | LY              | 3    | 0.3   | 99.6 | 0.4  | 99.6 | 26.9      | 64.8 | 9.4 | 85.2 | LY           | 3    | 0.4   | 98.3 | 0.8  | 98.2 |
| SIN.LV.SF  | 100     | 53           | 1          | 234               | 22.6          | LY             | LY              | 3    | -     | -    | -    | -    | -         | -    | -   | -    | LY           | 3    | -     | -    | -    | -    |
| SIN.LV.SF  | 100     | 41           | 1          | 238               | 36.1          | LY             | LY              | 3    | 3     | 96   | 1    | 98   | 35        | 61   | 2   | 72   | LY           | 2    | 2     | 94   | 3    | 93   |
| SIN.LV.SF  | 100     | 43           | 1          | 238               | 8             | LY             | LY              | 2    | 62    | 9    | 9    | 31   | 5         | 3    | 22  | 94   | LY           | 3    | 14    | 36   | 18   | 45   |
| SIN.LV.SF  | 100     | 56           | 1          | 248               | -             | ND             | -               | -    | -     | -    | -    | -    | -         | -    | -   | -    | -            | -    | -     | -    | -    | -    |
| SIN.LV.SF  | 100     | 47           | 1          | 254               | 9.4           | LY             | LY              | 3    | 1     | 92.3 | 0.7  | 97.5 | -         | -    | -   | -    | LY           | 3    | 1     | 85.2 | 1.6  | 92.2 |
| SIN.LV.SF  | 100     | 57           | 1          | 254               | 5.5           | LY             | LY              | 3    | 4.5   | 5.6  | 53.5 | 7.4  | -         | -    | -   | -    | LY           | 3    | 6.7   | 12.8 | 37.7 | 15.1 |

| Vector (a) | MOI (b) | Mouse ID (c) | Status (d) | Cell Age Days (e) | Tumor VCN (f) | Tumor Type (g) | Bone Marrow (h) |      |       |      |     |      | Blood (i) |      |      |      | Spleen (l)   |        |       |      |      |      |
|------------|---------|--------------|------------|-------------------|---------------|----------------|-----------------|------|-------|------|-----|------|-----------|------|------|------|--------------|--------|-------|------|------|------|
|            |         |              |            |                   |               |                | Pathol diag.    | I.G. | CD11b | CD19 | CD3 | GFP  | CD11b     | CD19 | CD3  | GFP  | Pathol diag. | I.G.   | CD11b | CD19 | CD3  | GFP  |
| SIN.LV.SF  | 100     | 44           | 1          | 256               | 8.3           | LY             | -               | -    | -     | -    | -   | -    | -         | -    | -    | -    | LY           | 2      | -     | -    | -    | -    |
| SIN.LV.SF  | 100     | 54           | 1          | 262               | 11.3          | LY-MY          | MY              | 3    | 17    | 75.7 | 3.1 | 90.1 | 43.7      | 39.6 | 11.8 | 93.4 | MY           | 3      | 17.1  | 72.5 | 13.9 | 89.2 |
| SIN.LV.SF  | 100     | 48           | 1          | 268               | 7.1           | LY             | LY              | 3    | 1.3   | 97.7 | 0.8 | 99.2 | 30.2      | 46.1 | 21.9 | 92.1 | LY           | 3      | 1.3   | 97.5 | 1.2  | 99.2 |
| SIN.LV.SF  | 100     | 33           | 1          | 270               | 27.8          | LY             | LY              | 3    | 2     | 97   | 0   | 98   | -         | -    | -    | -    | LY           | 2      | 2     | 97   | 1    | 96   |
| SIN.LV.SF  | 100     | 58           | 1          | 277               | 3.8           | LY             | NT              | 0    | 72.1  | 16.2 | 4.5 | 67.8 | 50.7      | 6.6  | 7.8  | 97   | LY           | 0-1    | 11.5  | 73.6 | 17.4 | 87.4 |
| SIN.LV.SF  | 100     | 62           | 1          | 280               | 5.2           | LY             | LY              | 3    | -     | -    | -   | -    | -         | -    | -    | -    | LY           | 3      | -     | -    | -    | -    |
| SIN.LV.SF  | 100     | 51           | 1          | 309               | 5.7           | LY             | NT              | 0    | 48.7  | 36.9 | 8.3 | 87   | 24.5      | 25   | 47.5 | 78.5 | LY           | 2      | 8.4   | 66.1 | 19.5 | 80.7 |
| SIN.LV.SF  | 100     | 65           | 1          | 319               | 15.7          | LY-MY          | NT              | 0    | 74.1  | 11.9 | 4.3 | 51.9 | -         | -    | -    | -    | LY           | 2      | 34.2  | 64.4 | 38.5 | 25.1 |
| SIN.LV.SF  | 100     | 49           | 1          | 343               | 3             | ND             | -               | -    | -     | -    | -   | -    | -         | -    | -    | -    | -            | -      | -     | -    | -    | -    |
| SIN.LV.SF  | 100     | 50           | 1          | 343               | 14.7          | ND             | -               | -    | -     | -    | -   | -    | -         | -    | -    | -    | -            | -      | -     | -    | -    | -    |
| SIN.LV.SF  | 100     | 39           | 1          | 383               | 13.8          | LY-MY          | NT              | 0    | 92.8  | 1.5  | 2   | 2.3  | -         | -    | -    | -    | LY           | 1      | -     | -    | -    | -    |
| SIN.LV.SF  | 100     | 46           | 1          | 385               | 9.3           | MY             | NT              | 0    | 85.5  | 5.3  | 5.6 | 90.5 | 68.1      | 22.9 | 7.4  | 94.6 | NT           | 0      | -     | -    | -    | -    |
| SIN.LV.SF  | 100     | 42           | 1          | 461               | 11.7          | MY             | MY              | 1    | 88.3  | 2.1  | 2.2 | 2.6  | -         | -    | -    | -    | NT           | 0      | 41.6  | 29   | 16.8 | 7    |
| SIN.LV.SF  | 100     | 45           | 1          | 467               | -             | ND             | -               | -    | -     | -    | -   | -    | -         | -    | -    | -    | -            | -      | -     | -    | -    | -    |
| SIN.LV.SF  | 100     | 38           | 1          | 486               | -             | ND             | -               | -    | -     | -    | -   | -    | -         | -    | -    | -    | -            | -      | -     | -    | -    | -    |
| SIN.RV.PGK | 100     | 11           | 1          | 130               | -             | ND             | -               | -    | -     | -    | -   | -    | -         | -    | -    | -    | -            | -      | -     | -    | -    | -    |
| SIN.RV.PGK | 100     | 12           | 1          | 130               | -             | ND             | -               | -    | -     | -    | -   | -    | -         | -    | -    | -    | -            | -      | -     | -    | -    | -    |
| SIN.RV.PGK | 100     | 19           | 1          | 144               | 8             | LY             | NT              | 0    | 76    | 10   | 5   | 78   | 34        | 40   | 3    | 89   | NT           | 0      | 9     | 71   | 13   | 83   |
| SIN.RV.PGK | 100     | 107          | 1          | 160               | -             | ND             | -               | -    | -     | -    | -   | -    | -         | -    | -    | -    | -            | -      | -     | -    | -    | -    |
| SIN.RV.PGK | 100     | 111          | 1          | 160               | -             | ND             | -               | -    | -     | -    | -   | -    | -         | -    | -    | -    | -            | -      | -     | -    | -    | -    |
| SIN.RV.PGK | 100     | 30           | 1          | 172               | 6.4           | LY             | NT              | 0    | 71    | 14   | 2   | 12   | 4         | 0    | 5    | 0    | NT           | 0      | 16    | 46   | 7    | 35   |
| SIN.RV.PGK | 100     | 100          | 1          | 175               | 12.6          | LY             | LY              | 3    | 6     | 0    | 4   | 98   | 28        | 12   | 10   | 93   | LY           | 02-mar | 4     | 14   | 3    | 98   |
| SIN.RV.PGK | 100     | 97           | 1          | 184               | -             | LY             | LY              | 3    | -     | -    | -   | -    | -         | -    | -    | -    | LY           | 2      | -     | -    | -    | -    |
| SIN.RV.PGK | 100     | 99           | 1          | 184               | 2.7           | LY             | LY              | 3    | -     | -    | -   | -    | -         | -    | -    | -    | LY           | 3      | -     | -    | -    | -    |

| Vector (a) | MOI (b) | Mouse ID (c) | Status (d) | Cell Age Days (e) | Tumor VCN (f) | Tumor Type (g) | Bone Marrow (h) |      |       |      |      |      | Blood (i) |      |      |      | Spleen (l)   |      |       |      |      |      |
|------------|---------|--------------|------------|-------------------|---------------|----------------|-----------------|------|-------|------|------|------|-----------|------|------|------|--------------|------|-------|------|------|------|
|            |         |              |            |                   |               |                | Pathol diag.    | I.G. | CD11b | CD19 | CD3  | GFP  | CD11b     | CD19 | CD3  | GFP  | Pathol diag. | I.G. | CD11b | CD19 | CD3  | GFP  |
| SIN.RV.PGK | 100     | 9            | 1          | 188               | 3.7           | LY             | LY              | 3    | 31    | 98   | 2    | 3    | 43        | 66   | 4    | 52   | LY           | 2    | 52    | 97   | 1    | 10   |
| SIN.RV.PGK | 100     | 102          | 1          | 192               | 7.2           | LY             | NT              | 0    | 47    | 41   | 4    | 86   | -         | -    | -    | -    | LY           | 2    | 11    | 70   | 20   | 83   |
| SIN.RV.PGK | 100     | 88           | 1          | 194               | 6.9           | LY             | LY              | 3    | 1     | 100  | 0    | 96   | -         | -    | -    | -    | LY           | 3    | 1     | 98   | 0    | 98   |
| SIN.RV.PGK | 100     | 105          | 1          | 199               | 9.4           | LY             | LY              | 3    | 1     | 99   | 0    | 99   | 37        | 64   | 3    | 84   | LY           | 2    | 3     | 96   | 2    | 95   |
| SIN.RV.PGK | 100     | 92           | 1          | 200               | 9.7           | LY             | NT              | 0    | 74    | 13   | 3    | 5    | 33        | 38   | 4    | 12   | NT           | 0    | 11    | 68   | 11   | 27   |
| SIN.RV.PGK | 100     | 96           | 1          | 207               | 3.8           | LY             | LY              | 3    | 2     | 97   | 0    | 98   | 18        | 64   | 21   | 60   | LY           | 2    | 4     | 92   | 6    | 87   |
| SIN.RV.PGK | 100     | 114          | 1          | 214               | 17.1          | LY             | LY              | 3    | 7.6   | 79.8 | 0.4  | 96.6 | -         | -    | -    | -    | LY           | 3    | 11.2  | 69.2 | 3.2  | 91.9 |
| SIN.RV.PGK | 100     | 91           | 1          | 221               | 6.3           | LY             | LY              | 3    | 12    | 90   | 3    | 4    | 9         | 90   | 4    | 26   | LY           | 0-1  | 5     | 83   | 5    | 26   |
| SIN.RV.PGK | 100     | 101          | 1          | 234               | 13.9          | LY-MY          | NT              | 0    | -     | -    | -    | -    | -         | -    | -    | -    | LY           | 2    | -     | -    | -    | -    |
| SIN.RV.PGK | 100     | 94           | 1          | 242               | 7.9           | LY             | LY              | 3    | -     | -    | -    | -    | -         | -    | -    | -    | LY           | 3    | -     | -    | -    | -    |
| SIN.RV.PGK | 100     | 103          | 1          | 244               | 3.5           | LY             | LY              | 3    | 1.7   | 97.9 | 0.5  | 98.9 | 25.3      | 45.3 | 21.3 | 84.3 | LY           | 2    | 4.2   | 87.9 | 7.2  | 92   |
| SIN.RV.PGK | 100     | 112          | 1          | 256               | 15.1          | LY             | NT              | 0    | 62.6  | 22.9 | 5    | 57.8 | 4.9       | 2.8  | 1.6  | 46.3 | NT           | 0    | 9.4   | 61.3 | 23.2 | 62.2 |
| SIN.RV.PGK | 100     | 104          | 1          | 272               | 10.6          | LY-MY          | NT              | 0    | 69.8  | 27.8 | 6.4  | 69.2 | 47.6      | 44.5 | 17.6 | 91   | MY           | 2    | 18.5  | 71.9 | 22.1 | 87   |
| SIN.RV.PGK | 100     | 109          | 1          | 299               | 8.9           | LY             | LY              | 3    | 1.4   | 97.3 | 1    | 99.1 | 29.9      | 58.7 | 12.7 | 84.2 | LY           | 2    | 6.9   | 77.3 | 11   | 84.8 |
| SIN.RV.PGK | 100     | 89           | 1          | 300               | 13.3          | LY             | NT              | 0    | 60.9  | 20.3 | 9.3  | 41.4 | 15.6      | 32.3 | 34.6 | 84.7 | LY           | 3    | 11.3  | 74.1 | 17.7 | 82.6 |
| SIN.RV.PGK | 100     | 93           | 1          | 314               | 6.8           | LY             | LY              | 3    | -     | -    | -    | -    | -         | -    | -    | -    | LY           | 1    | -     | -    | -    | -    |
| SIN.RV.PGK | 100     | 110          | 1          | 319               | 7.7           | MY             | -               | -    | 83.3  | 5.5  | 2.1  | 62.3 | -         | -    | -    | -    | MY           | 2    | 47.7  | 50.3 | 11.6 | 62.8 |
| SIN.RV.PGK | 100     | 87           | 1          | 320               | 4.9           | LY             | -               | -    | 2     | 97   | 0    | 100  | 25        | 70   | 0    | 96   | LY           | 3    | 2     | 97   | 0    | 100  |
| SIN.RV.PGK | 100     | 98           | 1          | 322               | 8.5           | LY             | LY              | 3    | 11    | 93.7 | 0.6  | 96.8 | 60.3      | 80.6 | 6.8  | 87.4 | LY           | 3    | 4.6   | 93.7 | 1.3  | 97.5 |
| SIN.RV.PGK | 100     | 108          | 1          | 326               | 7.7           | LY             | LY              | 1    | 62.6  | 19.9 | 7.1  | 58.6 | -         | -    | -    | -    | LY           | 2    | -     | -    | -    | -    |
| SIN.RV.PGK | 100     | 113          | 1          | 326               | 3.8           | LY             | NT              | 0    | 57.1  | 14.9 | 18.7 | 12.3 | -         | -    | -    | -    | LY           | 1    | -     | -    | -    | -    |
| SIN.RV.PGK | 100     | 90           | 1          | 347               | 6.4           | LY-MY          | MY              | 2    | 54.9  | 25.8 | 15.4 | 79.9 | -         | -    | -    | -    | MY           | 3    | 26.5  | 43.4 | 32.4 | 82.8 |
| SIN.RV.PGK | 100     | 95           | 1          | 396               | -             | ND             | -               | -    | -     | -    | -    | -    | -         | -    | -    | -    | -            | -    | -     | -    | -    | -    |
| SIN.RV.PGK | 100     | 106          | 1          | 412               | -             | ND             | -               | -    | -     | -    | -    | -    | -         | -    | -    | -    | -            | -    | -     | -    | -    | -    |

| Vector (a) | MOI<br>(b) | Mouse<br>ID (c) | Status<br>(d) | Cell<br>Age<br>Days<br>(e) | Tumor<br>VCN<br>(f) | Tumor<br>Type (g) | Bone Marrow (h) |      |       |      |     |     | Blood (i) |      |     |     | Spleen (l)      |      |       |      |     |     |
|------------|------------|-----------------|---------------|----------------------------|---------------------|-------------------|-----------------|------|-------|------|-----|-----|-----------|------|-----|-----|-----------------|------|-------|------|-----|-----|
|            |            |                 |               |                            |                     |                   | Pathol<br>diag. | I.G. | CD11b | CD19 | CD3 | GFP | CD11b     | CD19 | CD3 | GFP | Pathol<br>diag. | I.G. | CD11b | CD19 | CD3 | GFP |
| SIN.RV.PGK | 100        | 86              | 1             | 425                        | -                   | ND                | -               | -    | -     | -    | -   | -   | -         | -    | -   | -   | -               | -    | -     | -    | -   | -   |

**Supplementary Table 1a:** Tumor phenotype analysis by FACS and histopathology on bone marrow, blood and spleen of all transplanted mice for each treatment group.

In columns are indicated: (a): Vector Treatment on cells which defines the experimental group (SIN.LV.SF, LV.SF.LTR, SIN.RV.PGK, RV.SF.LTR, Mock); (b) MOI: Vector dose (Multiplicity Of Infection, MOI); (c): Mouse Identifier; (d): Status of the mice: 1:dead; 0:alive; (e): Cell age: age in days of the transplanted cells at the time of mouse death; (f): vector copy number in tumors; (g): Tumor Type: Tumor type was defined by merging histopathology and FACS data from all collected tissues: LY, Lymphoid Tumor (highlighted in yellow); MY, Myeloid Tumor (highlighted in red); LY-MY, Double tumors with coexisting lymphoid and myeloid expansions (highlighted in orange); ND, Not determined (highlighted in grey); (h), (i), (l) Histopathological and FACS analysis of bone marrow, blood, spleen. For each tissue hematoxylin and eosin-stained sections were analyzed by a team of pathologists that diagnosed (Pathol diag. columns) if myeloid (MY, highlighted in red), lymphoid (LY, highlighted in yellow) or double tumors with lymphoid and myeloid expansions were present, (LY-MY, highlighted in orange), NT (no tumor, highlighted in green) indicates absence of malignant infiltration in that section; in addition a semiquantitative scoring system (I.G; infiltration grade) was applied to each section (from 0 to 3, from none to the highest level of infiltration). The relative percentages of myeloid (CD11b), B (CD19) T (CD3) and GFP+ cells in BM, blood and spleen was also included. Normal range of myeloid cells in tumor free age-matched mice was  $55\pm4\%$  in BM,  $15\pm6\%$  in blood and  $10\pm6\%$  in spleen. Mice with  $>80\%$  CD11b+ cells in BM,  $>40\%$  in blood or  $>30\%$  in spleen were considered bearing a pathological expansion (highlighted in red). Normal levels of B cells (CD19+) were:  $19\pm3\%$  in BM,  $15\pm4\%$  in blood and  $57\pm10\%$  in spleen. Mice with  $>35\%$  of CD19+ cells in BM,  $>30\%$  of CD19+ cells in blood or  $>70\%$  of CD19+ cells in spleen were diagnosed as lymphoid B-cell tumors (LY, highlighted in yellow). Normal levels of T cells (CD3+) in tumor free controls were  $3\pm3\%$  in BM,  $53\pm10\%$  in blood and  $40\pm8\%$  in spleen. Mice with  $>8\%$  of CD3+ cells in BM,  $>80\%$  in blood or  $>70\%$  in spleen were diagnosed as lymphoid T-cell tumors (LY, highlighted in yellow).

**Supplementary Table 1b**

| Vector (a) | MOI (b) | Mouse ID (c) | Cell Age Days (e) | Tumor Type (g) | Thymus (m)   |      |       |      |      |      | Lymphonode (n) |      | Liver (o)    |      | Kidney (p)   |      | Lung (q)     |      | Gut (r)      |      | Brain (s)    |      | Heart (t)    |      |
|------------|---------|--------------|-------------------|----------------|--------------|------|-------|------|------|------|----------------|------|--------------|------|--------------|------|--------------|------|--------------|------|--------------|------|--------------|------|
|            |         |              |                   |                | Pathol diag. | I.G. | CD11b | CD19 | CD3  | GFP  | Pathol diag.   | I.G. | Pathol diag. | I.G. | Pathol diag. | I.G. | Pathol diag. | I.G. | Pathol diag. | I.G. | Pathol diag. | I.G. | Pathol diag. | I.G. |
| LV.SF.LTR  | 10      | 143          | 126               | ND             | -            | -    | -     | -    | -    | -    | -              | -    | -            | -    | -            | -    | -            | -    | -            | -    | -            | -    | -            | -    |
| LV.SF.LTR  | 10      | 148          | 165               | LY-MY          | LY           | 3    | 10    | 3.8  | 36.7 | 1.7  | LY             | 1    | LY           | 1    | LY           | 3    | LY           | 3    | MY           | 2    | NT           | 0    | LY           | 1    |
| LV.SF.LTR  | 10      | 6            | 181               | LY             | NT           | 0    | -     | -    | -    | -    | LY             | 3    | LY           | 2    | LY           | 1    | LY           | 0-1  | LY           | 0-1  | -            | -    | -            | -    |
| LV.SF.LTR  | 10      | 152          | 181               | LY             | LY           | 3    | 3.3   | 98.9 | 0.9  | 0.1  | LY             | 3    | LY           | 2    | NT           | 0    | LY           | 1-2  | NT           | 0    | NT           | 0    | NT           | 0    |
| LV.SF.LTR  | 10      | 145          | 187               | LY             | LY           | 3    | -     | -    | -    | -    | LY             | 3    | LY           | 2    | NT           | 0    | LY           | 2    | NT           | 0    | LY           | 1    | NT           | 0    |
| LV.SF.LTR  | 10      | 144          | 187               | MY             | MY           | 3    | -     | -    | -    | -    | MY             | 3    | MY           | 3    | NT           | 0    | MY           | 1    | MY           | 1    | NT           | 0    | NT           | 0    |
| LV.SF.LTR  | 10      | 7            | 188               | LY-MY          | MY           | 3    | -     | -    | -    | -    | MY             | 3    | MY           | 2    | MY           | 3    | MY           | 3    | NT           | 0    | -            | -    | -            | -    |
| LV.SF.LTR  | 10      | 147          | 193               | LY-MY          | LY           | 3    | -     | -    | -    | -    | MY             | 3    | LY           | 2    | LY           | 1    | NT           | 0    | MY           | 1    | NT           | 0    | NT           | 0    |
| LV.SF.LTR  | 10      | 150          | 202               | LY             | LY           | 1    | 19    | 0.4  | 67.9 | 0.2  | NT             | 0    | NT           | 0    | LY           | 1    | LY           | 3    | NT           | 0    | NT           | 0    | NT           | 0    |
| LV.SF.LTR  | 10      | 149          | 202               | LY-MY          | LY           | 3    | 0.9   | 97.9 | 0.8  | 97.7 | LY             | 3    | MY           | 2    | LY           | 1    | LY           | 1    | NT           | 0    | NT           | 0    | NT           | 0    |
| LV.SF.LTR  | 10      | 142          | 208               | LY             | LY           | 1    | 1.7   | 86   | 11.8 | 0.7  | LY             | 3    | LY           | 3    | NT           | 0    |
| LV.SF.LTR  | 10      | 18           | 214               | MY             | MY           | 2    | -     | -    | -    | -    | MY             | 3    | MY           | 3    | MY           | 3    | MY           | 3    | MY           | 3    | -            | -    | -            | -    |
| LV.SF.LTR  | 10      | 141          | 215               | LY             | LY           | 3    | -     | -    | -    | -    | LY             | 1    | LY           | 2    | NT           | 0    |
| LV.SF.LTR  | 10      | 151          | 215               | LY-MY          | LY           | 3    | 14.5  | 0.5  | 14   | 0.4  | -              | -    | MY           | 2    | Ly-My        | 2    | LY           | 2-3  | NT           | 0    | NT           | 0    | NT           | 0    |
| LV.SF.LTR  | 10      | 21           | 220               | MY             | MY           | 3    | -     | -    | -    | -    | MY             | 3    | MY           | 1    | MY           | 1    | MY           | 1    | MY           | 3    | -            | -    | -            | -    |
| LV.SF.LTR  | 10      | 140          | 231               | MY             | MY           | 3    | -     | -    | -    | -    | MY             | 3    | NT           | 0    | NT           | 0    | MY           | 3    | MY           | 3    | NT           | 0    | MY           | 2    |
| LV.SF.LTR  | 10      | 146          | 334               | LY-MY          | LY           | 3    | 22.6  | 90.6 | 3.5  | 0.3  | LY             | 3    | LY           | 3    | LY           | 1    | NT           | 0    | MY           | 2    | NT           | 0    | NT           | 0    |
| LV.SF.LTR  | 10      | 72           | 347               | LY             | -            | -    | -     | -    | -    | -    | -              | -    | -            | -    | -            | -    | -            | -    | -            | -    | -            | -    | -            | -    |
| LV.SF.LTR  | 10      | 73           | 356               | LY-MY          | MY           | 2    | 42.8  | 23.8 | 70.2 | 9    | MY             | 3    | MY           | 1    | MY           | 2    | MY           | 2    | NT           | 0    | NT           | 0    | NT           | 0    |
| LV.SF.LTR  | 10      | 74           | 377               | LY-MY          | MY           | 3    | -     | -    | -    | -    | -              | -    | MY           | 3    | NT           | 0    | MY           | 2    | NT           | 0    | NT           | 0    | NT           | 0    |
| LV.SF.LTR  | 10      | 71           | 402               | ND             | -            | -    | -     | -    | -    | -    | -              | -    | -            | -    | -            | -    | -            | -    | -            | -    | -            | -    | -            | -    |
| LV.SF.LTR  | 10      | 70           | 432               | LY-MY          | MY           | 2    | -     | -    | -    | -    | LY             | 3    | MY           | 2-3  | MY           | 1    | MY           | 1    | NT           | 0    | NT           | 0    | NT           | 0    |
| LV.SF.LTR  | 100     | 4            | 105               | LY             | NT           | 0    | -     | -    | -    | -    | -              | -    | NT           | 0    | NT           | 0    | NT           | 0    | NT           | 0    | -            | -    | -            | -    |

| Vector (a) | MOI (b) | Mouse ID (c) | Cell Age Days (e) | Tumor Type (g) | Thymus (m)   |      |       |      |      |     | Lymphonode (n) |      | Liver (o)    |      | Kidney (p)   |      | Lung (q)     |      | Gut (r)      |      | Brain (s)    |      | Heart (t)    |      |
|------------|---------|--------------|-------------------|----------------|--------------|------|-------|------|------|-----|----------------|------|--------------|------|--------------|------|--------------|------|--------------|------|--------------|------|--------------|------|
|            |         |              |                   |                | Pathol diag. | I.G. | CD11b | CD19 | CD3  | GFP | Pathol diag.   | I.G. | Pathol diag. | I.G. | Pathol diag. | I.G. | Pathol diag. | I.G. | Pathol diag. | I.G. | Pathol diag. | I.G. | Pathol diag. | I.G. |
| LV.SF.LTR  | 100     | 8            | 139               | LY-MY          | NT           | 0    | -     | -    | -    | -   | -              | -    | MY           | 1    | NT           | 0    | -            | -    | MY           | 3    | -            | -    | -            | -    |
| LV.SF.LTR  | 100     | 10           | 144               | MY             | MY           | 3    | -     | -    | -    | -   | -              | -    | MY           | 2    | MY           | 2    | MY           | 3    | MY           | 3    | -            | -    | -            | -    |
| LV.SF.LTR  | 100     | 13           | 146               | LY             | LY           | 2    | -     | -    | -    | -   | LY             | 3    | LY           | 2    | LY           | 1    | LY           | 1-2  | LY           | 1    | -            | -    | -            | -    |
| LV.SF.LTR  | 100     | 14           | 151               | LY             | LY           | 3    | -     | -    | -    | -   | LY             | 3    | LY           | 3    | LY           | 1-2  | LY           | 2    | LY           | 1-2  | -            | -    | -            | -    |
| LV.SF.LTR  | 100     | 16           | 153               | LY             | LY           | 3    | 1     | 0    | 22   | 95  | -              | -    | NT           | 0    | LY           | 2    | LY           | 3    | NT           | 0    | -            | -    | -            | -    |
| LV.SF.LTR  | 100     | 161          | 153               | LY-MY          | LY           | 3    | -     | -    | -    | -   | Ly-My          | 1    | NT           | 0    |
| LV.SF.LTR  | 100     | 153          | 155               | LY-MY          | MY           | 2    | -     | -    | -    | -   | MY             | 3    | MY           | 3    | MY           | 1    | NT           | 0    | MY           | 2    | NT           | 0    | NT           | 0    |
| LV.SF.LTR  | 100     | 22           | 164               | MY             | NT           | 0    | -     | -    | -    | -   | -              | -    | NT           | 0    | NT           | 0    | NT           | 0    | NT           | 0    | -            | -    | -            | -    |
| LV.SF.LTR  | 100     | 28           | 165               | LY             | LY           | 2    | -     | -    | -    | -   | LY             | 3    | LY           | 2    | NT           | 0    | NT           | 0    | NT           | 0    | -            | -    | -            | -    |
| LV.SF.LTR  | 100     | 163          | 172               | LY-MY          | LY           | 3    | 44.3  | 0.4  | 95.6 | 0.2 | MY             | 2    | MY           | 1    | NT           | 0    | LY           | 2-3  | MY           | 2    | NT           | 0    | NT           | 0    |
| LV.SF.LTR  | 100     | 164          | 172               | MY             | MY           | 3    | -     | -    | -    | -   | MY             | 3    | MY           | 3    | MY           | 1-2  | MY           | 1    | MY           | 2    | NT           | 0    | NT           | 0    |
| LV.SF.LTR  | 100     | 24           | 173               | LY-MY          | Ly-My        | 3    | -     | -    | -    | -   | LY             | 2    | LY           | 3    | LY           | 2    | MY           | 2    | MY           | 2    | -            | -    | -            | -    |
| LV.SF.LTR  | 100     | 82           | 185               | LY-MY          | LY           | 3    | 1     | 0    | 25   | 0   | -              | -    | MY           | 2    | MY           | 1    | MY           | 2    | NT           | 0    | -            | -    | -            | -    |
| LV.SF.LTR  | 100     | 156          | 187               | LY             | LY           | 3    | 15.7  | 3.9  | 15.9 | 1.3 | LY             | 3    | LY           | 1    | LY           | 3    | LY           | 3    | NT           | 0    | NT           | 0    | LY           | 1    |
| LV.SF.LTR  | 100     | 32           | 193               | LY-MY          | MY           | 1    | -     | -    | -    | -   | -              | -    | MY           | 1-2  | MY           | 1    | MY           | 3    | MY           | 2    | -            | -    | -            | -    |
| LV.SF.LTR  | 100     | 154          | 193               | LY-MY          | LY           | 0-1  | -     | -    | -    | -   | MY             | 3    | MY           | 3    | MY           | 1    | MY           | 1    | MY           | 2    | NT           | 0    | -            | -    |
| LV.SF.LTR  | 100     | 155          | 193               | LY-MY          | MY           | 3    | -     | -    | -    | -   | MY             | 3    | MY           | 3    | NT           | 0    | MY           | 1-2  | MY           | 1    | NT           | 0    | NT           | 0    |
| LV.SF.LTR  | 100     | 159          | 200               | LY-MY          | LY           | 2    | -     | -    | -    | -   | MY             | 3    | LY           | 3    | NT           | 0    | LY           | 1    | MY           | 1    | NT           | 0    | NT           | 0    |
| LV.SF.LTR  | 100     | 160          | 200               | LY-MY          | LY           | 3    | 96.4  | 0.3  | 2.2  | 0.2 | MY             | 2    | MY           | 2    | LY           | 1    | LY           | 3    | NT           | 0    | NT           | 0    | NT           | 0    |
| LV.SF.LTR  | 100     | 166          | 202               | LY-MY          | LY           | 3    | -     | -    | -    | -   | MY             | 2    | MY           | 3    | NT           | 0    | MY           | 1    | MY           | 1    | MY           | 1    | NT           | 0    |
| LV.SF.LTR  | 100     | 83           | 207               | LY             | LY           | 2    | -     | -    | -    | -   | LY             | 2    | LY           | 1    | NT           | 0    | NT           | 0    | NT           | 0    | -            | -    | -            | -    |
| LV.SF.LTR  | 100     | 81           | 214               | LY-MY          | NT           | 0    | -     | -    | -    | -   | -              | -    | MY           | 3    | MY           | 2-3  | MY           | 1    | MY           | 1    | -            | -    | -            | -    |
| LV.SF.LTR  | 100     | 84           | 229               | LY-MY          | MY           | 3    | -     | -    | -    | -   | -              | -    | MY           | 3    | MY           | 1    | MY           | 2    | MY           | 2    | -            | -    | -            | -    |
| LV.SF.LTR  | 100     | 85           | 231               | LY             | LY           | 3    | 4     | 91   | 8    | 6   | -              | -    | LY           | 2-3  | LY           | 1    | NT           | 0    | LY           | 1    | -            | -    | -            | -    |

| Vector (a) | MOI (b) | Mouse ID (c) | Cell Age Days (e) | Tumor Type (g) | Thymus (m)   |      |       |      |      |      | Lymphonode (n) |      | Liver (o)    |      | Kidney (p)   |      | Lung (q)     |      | Gut (r)      |      | Brain (s)    |      | Heart (t)    |      |
|------------|---------|--------------|-------------------|----------------|--------------|------|-------|------|------|------|----------------|------|--------------|------|--------------|------|--------------|------|--------------|------|--------------|------|--------------|------|
|            |         |              |                   |                | Pathol diag. | I.G. | CD11b | CD19 | CD3  | GFP  | Pathol diag.   | I.G. | Pathol diag. | I.G. | Pathol diag. | I.G. | Pathol diag. | I.G. | Pathol diag. | I.G. | Pathol diag. | I.G. | Pathol diag. | I.G. |
| LV.SF.LTR  | 100     | 158          | 235               | LY             | LY           | 3    | 2.4   | 0.1  | 0.3  | 0.3  | NT             | 0    | NT           | 0    | LY           | 3    | LY           | 3    | NT           | 0    | NT           | 0    | LY           | 2    |
| LV.SF.LTR  | 100     | 157          | 263               | LY-MY          | LY           | 0-1  | 9.3   | 52.1 | 23.5 | 6.8  | NT             | 0    | NT           | 0    | NT           | 0    | NT           | 0    | NT           | 0    | NT           | 0    | NT           | 0    |
| LV.SF.LTR  | 100     | 165          | 279               | LY             | LY           | 3    | 19.2  | 5.2  | 1.7  | 95.4 | LY             | 3    | LY           | 3    | LY           | 3    | LY           | 2    | LY           | 1    | NT           | 0    | NT           | 0    |
| LV.SF.LTR  | 100     | 162          | 305               | LY             | LY           | 3    | -     | -    | -    | -    | LY             | 3    | LY           | 1    | LY           | 1    | LY           | 1    | NT           | 0    | NT           | 0    | NT           | 0    |
| Mock       | -       | 2            | 146               | LY-MY          | -            | -    | -     | -    | -    | -    | -              | -    | LY-MY        | 3    | MY           | 1    | -            | -    | NT           | 0    | -            | -    | -            | -    |
| Mock       | -       | 27           | 160               | LY             | LY           | 3    | -     | -    | -    | -    | LY             | 3    | LY           | 2-3  | LY           | 1    | NT           | 0    | -            | -    | -            | -    | -            | -    |
| Mock       | -       | 130          | 164               | ND             | -            | -    | -     | -    | -    | -    | -              | -    | -            | -    | -            | -    | -            | -    | -            | -    | -            | -    | -            | -    |
| Mock       | -       | 29           | 179               | LY             | LY           | 3    | 1     | 99   | 0    | 0    | LY             | 3    | LY           | 1-2  | LY           | 1    | NT           | 0    | LY           | 2    | -            | -    | -            | -    |
| Mock       | -       | 31           | 192               | ND             | -            | -    | -     | -    | -    | -    | -              | -    | -            | -    | -            | -    | -            | -    | -            | -    | -            | -    | -            | -    |
| Mock       | -       | 170          | 197               | LY             | LY           | 3    | 5.1   | 97.5 | 1.5  | 0    | LY             | 3    | LY           | 1-2  | LY           | 1    | NT           | 0    | NT           | 0    | LY           | 1    | NT           | 0    |
| Mock       | -       | 128          | 203               | LY-MY          | LY           | 3    | -     | -    | -    | -    | -              | -    | LY           | 2    | NT           | 0    | NT           | 0    | NT           | 0    | -            | -    | -            | -    |
| Mock       | -       | 135          | 209               | LY             | LY           | 3    | -     | -    | -    | -    | LY             | 3    | LY           | 2    | NT           | 0    | LY           | 1    | LY           | 1    | -            | -    | -            | -    |
| Mock       | -       | 126          | 216               | LY             | LY           | 3    | -     | -    | -    | -    | -              | -    | LY           | 3    | -            | -    | -            | -    | -            | -    | -            | -    | -            | -    |
| Mock       | -       | 139          | 219               | ND             | -            | -    | -     | -    | -    | -    | -              | -    | -            | -    | -            | -    | -            | -    | -            | -    | -            | -    | -            | -    |
| Mock       | -       | 169          | 228               | LY             | NT           | 0    | -     | -    | -    | -    | LY             | 3    | LY           | 2    | NT           | 0    | LY           | 1    | NT           | 0    | -            | -    | NT           | 0    |
| Mock       | -       | 124          | 229               | LY-MY          | MY           | 3    | 12    | 28   | 32   | 0    | -              | -    | MY           | 1    | MY           | 3    | MY           | 3    | NT           | 0    | -            | -    | -            | -    |
| Mock       | -       | 131          | 237               | MY             | MY           | 2    | -     | -    | -    | -    | -              | -    | MY           | 2    | MY           | 2    | MY           | 2    | NT           | 0    | NT           | 0    | MY           | 2    |
| Mock       | -       | 129          | 240               | LY-MY          | MY           | 2    | -     | -    | -    | -    | -              | -    | LY           | 2    | LY           | 2    | LY           | 3    | NT           | 0    | -            | -    | -            | -    |
| Mock       | -       | 168          | 241               | LY             | LY           | 3    | -     | -    | -    | -    | LY             | 3    | LY           | 2    | LY           | 1    | NT           | 0    | NT           | 0    | -            | -    | NT           | 0    |
| Mock       | -       | 125          | 247               | ND             | -            | -    | -     | -    | -    | -    | -              | -    | -            | -    | -            | -    | -            | -    | -            | -    | -            | -    | -            | -    |
| Mock       | -       | 167          | 249               | LY             | -            | -    | -     | -    | -    | -    | LY             | 3    | LY           | 2-3  | NT           | 0    | NT           | 0    | NT           | 0    | -            | -    | NT           | 0    |
| Mock       | -       | 127          | 254               | LY-MY          | MY           | 1    | -     | -    | -    | -    | MY             | 3    | NT           | 0    | MY           | 1    | MY           | 1    | NT           | 0    | NT           | 0    | MY           | 0-1  |
| Mock       | -       | 120          | 261               | ND             | -            | -    | -     | -    | -    | -    | -              | -    | -            | -    | -            | -    | -            | -    | -            | -    | -            | -    | -            | -    |
| Mock       | -       | 117          | 270               | LY             | -            | -    | -     | -    | -    | -    | -              | -    | LY           | 1    | NT           | 0    | NT           | 0    | NT           | 0    | -            | -    | -            | -    |

| Vector (a) | MOI (b) | Mouse ID (c) | Cell Age Days (e) | Tumor Type (g) | Thymus (m)   |      |       |       |      |      | Lymphonode (n) |      | Liver (o)    |      | Kidney (p)   |      | Lung (q)     |      | Gut (r)      |      | Brain (s)    |      | Heart (t)    |      |
|------------|---------|--------------|-------------------|----------------|--------------|------|-------|-------|------|------|----------------|------|--------------|------|--------------|------|--------------|------|--------------|------|--------------|------|--------------|------|
|            |         |              |                   |                | Pathol diag. | I.G. | CD11b | CD19  | CD3  | GFP  | Pathol diag.   | I.G. | Pathol diag. | I.G. | Pathol diag. | I.G. | Pathol diag. | I.G. | Pathol diag. | I.G. | Pathol diag. | I.G. | Pathol diag. | I.G. |
| Mock       | -       | 121          | 271               | MY             | MY           | 3    | -     | -     | -    | -    | MY             | 3    | MY           | 2    | MY           | 3    | MY           | 3    | NT           | 0    | -            | -    | -            | -    |
| Mock       | -       | 138          | 279               | LY             | LY           | 3    | -     | -     | -    | -    | LY             | 3    | LY           | 2-3  | LY           | 3    | LY           | 3    | -            | -    | NT           | 0    | NT           | 0    |
| Mock       | -       | 137          | 287               | LY             | LY           | 0-1  | -     | -     | -    | -    | NT             | 0    | -            | -    | NT           | 0    |
| Mock       | -       | 115          | 291               | LY             | LY           | 3    | -     | -     | -    | -    | -              | -    | LY           | 2    | LY           | 1    | LY           | 2    | NT           | 0    | -            | -    | -            | -    |
| Mock       | -       | 136          | 293               | LY             | LY           | 3    | -     | -     | -    | -    | -              | -    | LY           | 1    | NT           | 0    |
| Mock       | -       | 133          | 293               | ND             | -            | -    | -     | -     | -    | -    | -              | -    | -            | -    | -            | -    | -            | -    | -            | -    | -            | -    | -            | -    |
| Mock       | -       | 134          | 293               | ND             | -            | -    | -     | -     | -    | -    | -              | -    | -            | -    | -            | -    | -            | -    | -            | -    | -            | -    | -            | -    |
| Mock       | -       | 118          | 307               | ND             | -            | -    | -     | -     | -    | -    | -              | -    | -            | -    | -            | -    | -            | -    | -            | -    | -            | -    | -            | -    |
| Mock       | -       | 119          | 310               | ND             | -            | -    | -     | -     | -    | -    | -              | -    | -            | -    | -            | -    | -            | -    | -            | -    | -            | -    | -            | -    |
| Mock       | -       | 122          | 349               | ND             | -            | -    | -     | -     | -    | -    | -              | -    | -            | -    | -            | -    | -            | -    | -            | -    | -            | -    | -            | -    |
| Mock       | -       | 116          | 377               | ND             | -            | -    | -     | -     | -    | -    | -              | -    | -            | -    | -            | -    | -            | -    | -            | -    | -            | -    | -            | -    |
| Mock       | -       | 123          | 440               | ND             | -            | -    | -     | -     | -    | -    | -              | -    | -            | -    | -            | -    | -            | -    | -            | -    | -            | -    | -            | -    |
| RV.SF.LTR  | 100     | 191          | 116               | LY             | -            | -    | -     | -     | -    | -    | LY             | 3    | LY           | 1    | -            | -    | -            | -    | -            | -    | -            | -    | -            | -    |
| RV.SF.LTR  | 100     | 192          | 158               | LY             | LY           | 3    | -     | -     | -    | -    | LY             | 3    | LY           | 2    | NT           | 0    |
| RV.SF.LTR  | 100     | 195          | 170               | LY             | LY           | 3    | 2     | 72.9  | 15.1 | 82.6 | LY             | 3    | LY           | 2    | NT           | 0    | NT           | 0    | LY           | 1    | NT           | 0    | NT           | 0    |
| RV.SF.LTR  | 100     | 188          | 185               | LY             | LY           | 3    | 0.4   | 92.7  | 1.5  | 98.4 | LY             | 3    | LY           | 3    | LY           | 3    | LY           | 1    | NT           | 0    | LY           | 1    | LY           | 1    |
| RV.SF.LTR  | 100     | 187          | 192               | MY             | MY           | 3    | -     | -     | -    | -    | MY             | 3    | MY           | 3    | MY           | 2    | MY           | 3    | MY           | 3    | NT           | 0    | NT           | 0    |
| RV.SF.LTR  | 100     | 190          | 192               | MY             | MY           | 3    | -     | -     | -    | -    | MY             | 3    | MY           | 2    | MY           | 3    | MY           | 2    | MY           | 3    | NT           | 0    | NT           | 0    |
| RV.SF.LTR  | 100     | 185          | 197               | LY             | LY           | 3    | 3.8   | 100.2 | 0.2  | 99.4 | LY             | 3    | LY           | 2-3  | LY           | 2    | NT           | 0    | LY           | 1    | NT           | 0    | NT           | 0    |
| RV.SF.LTR  | 100     | 189          | 205               | LY-MY          | LY           | 2    | 50.7  | 52.4  | 24.1 | 67.4 | LY             | 3    | LY           | 3    | LY           | 1    | MY           | 1    | MY           | 3    | NT           | 0    | NT           | 0    |
| RV.SF.LTR  | 100     | 194          | 221               | LY             | LY           | 2    | 16.4  | 95.1  | 1.5  | 2.9  | LY             | 3    | LY           | 2-3  | LY           | 2    | LY           | 2    | LY           | 2    | LY           | 1    | LY           | 1    |
| RV.SF.LTR  | 100     | 186          | 255               | MY             | MY           | 3    | -     | -     | -    | -    | -              | -    | MY           | 3    | MY           | 3    | MY           | 3    | MY           | 3    | LY           | 2    | NT           | 0    |
| RV.SF.LTR  | 100     | 184          | 354               | -              | -            | -    | -     | -     | -    | -    | -              | -    | -            | -    | -            | -    | -            | -    | -            | -    | -            | -    | -            | -    |
| RV.SF.LTR  | 100     | 193          | 354               | -              | -            | -    | -     | -     | -    | -    | -              | -    | -            | -    | -            | -    | -            | -    | -            | -    | -            | -    | -            | -    |

| Vector (a) | MOI (b) | Mouse ID (c) | Cell Age Days (e) | Tumor Type (g) | Thymus (m)   |      |       |      |      |      | Lymphonode (n) |      | Liver (o)    |      | Kidney (p)   |      | Lung (q)     |      | Gut (r)      |      | Brain (s)    |      | Heart (t)    |      |
|------------|---------|--------------|-------------------|----------------|--------------|------|-------|------|------|------|----------------|------|--------------|------|--------------|------|--------------|------|--------------|------|--------------|------|--------------|------|
|            |         |              |                   |                | Pathol diag. | I.G. | CD11b | CD19 | CD3  | GFP  | Pathol diag.   | I.G. | Pathol diag. | I.G. | Pathol diag. | I.G. | Pathol diag. | I.G. | Pathol diag. | I.G. | Pathol diag. | I.G. | Pathol diag. | I.G. |
| SIN.LV.SF  | 100     | 68           | 133               | ND             | -            | -    | -     | -    | -    | -    | -              | -    | -            | -    | -            | -    | -            | -    | -            | -    | -            | -    | -            | -    |
| SIN.LV.SF  | 100     | 1            | 146               | LY             | LY           | 3    | 19    | 0    | 0    | 1    | -              | -    | NT           | 0    | LY           | 1    | -            | -    | NT           | 0    | -            | -    | -            | -    |
| SIN.LV.SF  | 100     | 64           | 153               | ND             | -            | -    | -     | -    | -    | -    | -              | -    | -            | -    | -            | -    | -            | -    | -            | -    | -            | -    | -            | -    |
| SIN.LV.SF  | 100     | 3            | 161               | LY             | LY           | 3    | -     | -    | -    | -    | LY             | 3    | LY           | 1    | LY           | 1    | NT           | 0    | NT           | 0    | -            | -    | -            | -    |
| SIN.LV.SF  | 100     | 55           | 162               | LY             | LY           | 3    | 8     | 75   | 7    | 74   | LY             | 3    | LY           | 1    | LY           | 1    | LY           | 1    | NT           | 0    | -            | -    | -            | -    |
| SIN.LV.SF  | 100     | 60           | 162               | LY             | LY           | 3    | 11    | 10   | 2    | 11   | -              | -    | LY           | 1    | LY           | 2    | LY           | 2    | NT           | 0    | -            | -    | -            | -    |
| SIN.LV.SF  | 100     | 23           | 171               | LY             | LY           | 3    | -     | -    | -    | -    | -              | -    | LY           | 2    | LY           | 1    | NT           | 0    | NT           | 0    | -            | -    | -            | -    |
| SIN.LV.SF  | 100     | 26           | 174               | LY             | LY           | 3    | 1     | 1    | 1    | 99   | LY             | 3    | LY           | 1-2  | LY           | 3    | LY           | 3    | NT           | 0    | -            | -    | -            | -    |
| SIN.LV.SF  | 100     | 52           | 184               | MY             | -            | -    | -     | -    | -    | -    | -              | -    | MY           | 3    | MY           | 3    | -            | -    | -            | -    | -            | -    | -            | -    |
| SIN.LV.SF  | 100     | 61           | 192               | LY             | LY           | 3    | 3     | 0    | 7    | 100  | -              | -    | LY           | 1    | LY           | 1    | LY           | 2    | LY           | 0-1  | -            | -    | -            | -    |
| SIN.LV.SF  | 100     | 63           | 192               | LY-MY          | LY           | 2    | -     | -    | -    | -    | -              | -    | LY           | 1    | LY           | 1    | LY           | 2    | LY           | 1    | -            | -    | -            | -    |
| SIN.LV.SF  | 100     | 66           | 194               | LY             | LY           | 3    | -     | -    | -    | -    | LY             | 3    | LY           | 3    | LY           | 3    | LY           | 3    | NT           | 0    | -            | -    | -            | -    |
| SIN.LV.SF  | 100     | 59           | 212               | LY             | LY           | 3    | -     | -    | -    | -    | -              | -    | LY           | 3    | LY           | 2    | LY           | 1    | LY           | 1    | -            | -    | -            | -    |
| SIN.LV.SF  | 100     | 17           | 214               | LY-MY          | MY           | 3    | -     | -    | -    | -    | -              | -    | MY           | 3    | MY           | 2    | MY           | 2    | MY           | 2    | -            | -    | -            | -    |
| SIN.LV.SF  | 100     | 69           | 217               | ND             | -            | -    | -     | -    | -    | -    | -              | -    | -            | -    | -            | -    | -            | -    | -            | -    | -            | -    | -            | -    |
| SIN.LV.SF  | 100     | 25           | 230               | LY             | LY           | 3    | -     | -    | -    | -    | LY             | 3    | LY           | 2    | LY           | 1    | NT           | 0    | NT           | 0    | -            | -    | -            | -    |
| SIN.LV.SF  | 100     | 40           | 230               | ND             | NT           | 0    | -     | -    | -    | -    | -              | -    | NT           | 0    | -            | -    | -            | -    | -            | -    | -            | -    | -            | -    |
| SIN.LV.SF  | 100     | 67           | 231               | LY             | LY           | 3    | 0.4   | 99   | 1.1  | 98.6 | LY             | 3    | LY           | 2    | LY           | 1    | LY           | 0-1  | LY           | 2    | NT           | 0    | NT           | 0    |
| SIN.LV.SF  | 100     | 53           | 234               | LY             | LY           | 3    | -     | -    | -    | -    | -              | -    | LY           | 2    | LY           | 1    | -            | -    | NT           | 0    | -            | -    | -            | -    |
| SIN.LV.SF  | 100     | 41           | 238               | LY             | LY           | 3    | 1     | 99   | 0    | 100  | -              | -    | LY           | 2    | LY           | 0-1  | NT           | 0    | LY           | 1    | -            | -    | -            | -    |
| SIN.LV.SF  | 100     | 43           | 238               | LY             | LY           | 3    | 0     | 0    | 23   | 100  | -              | -    | LY           | 0-1  | LY           | 2    | LY           | 3    | NT           | 0    | -            | -    | -            | -    |
| SIN.LV.SF  | 100     | 56           | 248               | ND             | -            | -    | -     | -    | -    | -    | -              | -    | -            | -    | -            | -    | -            | -    | -            | -    | -            | -    | -            | -    |
| SIN.LV.SF  | 100     | 47           | 254               | LY             | LY           | 2    | 10    | 68   | 11.2 | 80   | LY             | 3    | LY           | 3    | LY           | 0-1  | LY           | 1    | NT           | 0    | NT           | 0    | NT           | 0    |
| SIN.LV.SF  | 100     | 57           | 254               | LY             | LY           | 3    | 7.5   | 1.1  | 55.8 | 0.8  | LY             | 3    | LY           | 2    | LY           | 2    | LY           | 3    | NT           | 0    | NT           | 0    | LY           | 1    |

| Vector (a) | MOI (b) | Mouse ID (c) | Cell Age Days (e) | Tumor Type (g) | Thymus (m)   |      |       |      |      |      | Lymphonode (n) |      | Liver (o)    |      | Kidney (p)   |      | Lung (q)     |      | Gut (r)      |      | Brain (s)    |      | Heart (t)    |      |
|------------|---------|--------------|-------------------|----------------|--------------|------|-------|------|------|------|----------------|------|--------------|------|--------------|------|--------------|------|--------------|------|--------------|------|--------------|------|
|            |         |              |                   |                | Pathol diag. | I.G. | CD11b | CD19 | CD3  | GFP  | Pathol diag.   | I.G. | Pathol diag. | I.G. | Pathol diag. | I.G. | Pathol diag. | I.G. | Pathol diag. | I.G. | Pathol diag. | I.G. | Pathol diag. | I.G. |
| SIN.LV.SF  | 100     | 44           | 256               | LY             | LY           | 3    | -     | -    | -    | -    | LY             | 3    | LY           | 2    | NT           | 0    | LY           | 1-2  | NT           | 0    | -            | -    | -            | -    |
| SIN.LV.SF  | 100     | 54           | 262               | LY-MY          | MY           | 3    | -     | -    | -    | -    | MY             | 3    | MY           | 2    | MY           | 3    | MY           | 2    | MY           | 2    | MY           | 1    | MY           | 2    |
| SIN.LV.SF  | 100     | 48           | 268               | LY             | LY           | 3    | -     | -    | -    | -    | LY             | 3    | LY           | 2    | LY           | 2    | LY           | 1    | NT           | 0    | NT           | 0    | NT           | 0    |
| SIN.LV.SF  | 100     | 33           | 270               | LY             | LY           | 3    | -     | -    | -    | 82   | LY             | 1    | LY           | 2-3  | NT           | 0    | LY           | 1    | LY           | 1    | -            | -    | -            | -    |
| SIN.LV.SF  | 100     | 58           | 277               | LY             | LY           | 3    | 57.7  | 0.6  | 3.2  | 98.6 | -              | -    | NT           | 0    | NT           | 0    | LY           | 3    | NT           | 0    | NT           | 0    | NT           | 0    |
| SIN.LV.SF  | 100     | 62           | 280               | LY             | LY           | 3    | -     | -    | -    | -    | LY             | 3    | LY           | 2    | LY           | 1    | LY           | 1    | NT           | 0    | NT           | 0    | NT           | 0    |
| SIN.LV.SF  | 100     | 51           | 309               | LY             | LY           | 3    | 22.1  | 0.6  | 94.8 | 1.3  | -              | -    | NT           | 0    | NT           | 0    | LY           | 2    | NT           | 0    | NT           | 0    | NT           | 0    |
| SIN.LV.SF  | 100     | 65           | 319               | LY-MY          | LY           | 1    | -     | -    | -    | -    | NT             | 0    | NT           | 0    | NT           | 0    | NT           | 0    | NT           | 0    | NT           | 0    | NT           | 0    |
| SIN.LV.SF  | 100     | 49           | 343               | ND             | -            | -    | -     | -    | -    | -    | -              | -    | -            | -    | -            | -    | -            | -    | -            | -    | -            | -    | -            | -    |
| SIN.LV.SF  | 100     | 50           | 343               | ND             | -            | -    | -     | -    | -    | -    | -              | -    | -            | -    | -            | -    | -            | -    | -            | -    | -            | -    | -            | -    |
| SIN.LV.SF  | 100     | 39           | 383               | LY-MY          | -            | -    | -     | -    | -    | -    | LY             | 1    | LY           | 1    | MY           | 1    | MY           | 1    | NT           | 0    | NT           | 0    | NT           | 0    |
| SIN.LV.SF  | 100     | 46           | 385               | MY             | MY           | 2    | -     | -    | -    | -    | -              | -    | NT           | 0    | MY           | 3    | MY           | 1    | NT           | 0    | NT           | 0    | -            | -    |
| SIN.LV.SF  | 100     | 42           | 461               | MY             | MY           | 3    | -     | -    | -    | -    | NT             | 0    | MY           | 2-3  | NT           | 0    |
| SIN.LV.SF  | 100     | 45           | 467               | ND             | -            | -    | -     | -    | -    | -    | -              | -    | -            | -    | -            | -    | -            | -    | -            | -    | -            | -    | -            | -    |
| SIN.LV.SF  | 100     | 38           | 486               | ND             | -            | -    | -     | -    | -    | -    | -              | -    | -            | -    | -            | -    | -            | -    | -            | -    | -            | -    | -            | -    |
| SIN.RV.PGK | 100     | 11           | 130               | ND             | -            | -    | -     | -    | -    | -    | -              | -    | -            | -    | -            | -    | -            | -    | -            | -    | -            | -    | -            | -    |
| SIN.RV.PGK | 100     | 12           | 130               | ND             | -            | -    | -     | -    | -    | -    | -              | -    | -            | -    | -            | -    | -            | -    | -            | -    | -            | -    | -            | -    |
| SIN.RV.PGK | 100     | 19           | 144               | LY             | NT           | 0    | -     | -    | -    | -    | -              | -    | NT           | 0    | NT           | 0    | NT           | 0    | NT           | 0    | -            | -    | -            | -    |
| SIN.RV.PGK | 100     | 107          | 160               | ND             | -            | -    | -     | -    | -    | -    | -              | -    | -            | -    | -            | -    | -            | -    | -            | -    | -            | -    | -            | -    |
| SIN.RV.PGK | 100     | 111          | 160               | ND             | -            | -    | -     | -    | -    | -    | -              | -    | -            | -    | -            | -    | -            | -    | -            | -    | -            | -    | -            | -    |
| SIN.RV.PGK | 100     | 30           | 172               | LY             | LY           | 3    | 0     | 0    | 2    | 0    | LY             | 3    | NT           | 0    | NT           | 0    | LY           | 1    | NT           | 0    | -            | -    | -            | -    |
| SIN.RV.PGK | 100     | 100          | 175               | LY             | LY           | 3    | 2     | 3    | 7    | 99   | -              | -    | LY           | 3    | LY           | 3    | LY           | 3    | LY           | 2    | -            | -    | -            | -    |
| SIN.RV.PGK | 100     | 97           | 184               | LY             | LY           | 0-1  | -     | -    | -    | -    | -              | -    | LY           | 2    | -            | -    | -            | -    | -            | -    | -            | -    | -            | -    |
| SIN.RV.PGK | 100     | 99           | 184               | LY             | LY           | 3    | -     | -    | -    | -    | -              | -    | LY           | 3    | -            | -    | -            | -    | -            | -    | -            | -    | -            | -    |

| Vector (a) | MOI (b) | Mouse ID (c) | Cell Age Days (e) | Tumor Type (g) | Thymus (m)   |      |       |      |      |      | Lymphonode (n) |      | Liver (o)    |      | Kidney (p)   |      | Lung (q)     |      | Gut (r)      |      | Brain (s)    |      | Heart (t)    |      |
|------------|---------|--------------|-------------------|----------------|--------------|------|-------|------|------|------|----------------|------|--------------|------|--------------|------|--------------|------|--------------|------|--------------|------|--------------|------|
|            |         |              |                   |                | Pathol diag. | I.G. | CD11b | CD19 | CD3  | GFP  | Pathol diag.   | I.G. | Pathol diag. | I.G. | Pathol diag. | I.G. | Pathol diag. | I.G. | Pathol diag. | I.G. | Pathol diag. | I.G. | Pathol diag. | I.G. |
| SIN.RV.PGK | 100     | 9            | 188               | LY             | LY           | 1    | -     | -    | -    | -    | -              | -    | LY           | 3    | LY           | 1    | NT           | 0    | NT           | 0    | -            | -    | -            | -    |
| SIN.RV.PGK | 100     | 102          | 192               | LY             | LY           | 2    | -     | -    | -    | -    | -              | -    | NT           | 0    | NT           | 0    | -            | -    | NT           | 0    | -            | -    | -            | -    |
| SIN.RV.PGK | 100     | 88           | 194               | LY             | LY           | 3    | -     | -    | -    | -    | -              | -    | LY           | 3    | LY           | 2    | LY           | 1-2  | LY           | 0-1  | -            | -    | -            | -    |
| SIN.RV.PGK | 100     | 105          | 199               | LY             | LY           | 3    | -     | -    | -    | -    | -              | -    | LY           | 1    | NT           | 0    | NT           | 0    | NT           | 0    | -            | -    | -            | -    |
| SIN.RV.PGK | 100     | 92           | 200               | LY             | LY           | 3    | 16    | 12   | 2    | 4    | NT             | 0    | NT           | 0    | NT           | 0    | LY           | 3    | NT           | 0    | -            | -    | -            | -    |
| SIN.RV.PGK | 100     | 96           | 207               | LY             | LY           | 3    | -     | -    | -    | -    | -              | -    | LY           | 2    | NT           | 0    | -            | -    | NT           | 0    | -            | -    | -            | -    |
| SIN.RV.PGK | 100     | 114          | 214               | LY             | -            | -    | 7.7   | 74   | -    | 96.7 | LY             | 3    | LY           | 2    | LY           | 3    | LY           | 2    | LY           | 2    | -            | -    | -            | -    |
| SIN.RV.PGK | 100     | 91           | 221               | LY             | LY           | 1-2  | -     | -    | -    | -    | -              | -    | LY           | 2    | LY           | 1    | NT           | 0    | NT           | 0    | -            | -    | -            | -    |
| SIN.RV.PGK | 100     | 101          | 234               | LY-MY          | NT           | 0    | -     | -    | -    | -    | NT             | 0    | NT           | 0    | MY           | 1    | MY           | 1    | MY           | 3    | -            | -    | -            | -    |
| SIN.RV.PGK | 100     | 94           | 242               | LY             | LY           | 3    | -     | -    | -    | -    | -              | -    | LY           | 2-3  | LY           | 3    | LY           | 3    | NT           | 0    | -            | -    | -            | -    |
| SIN.RV.PGK | 100     | 103          | 244               | LY             | LY           | 3    | -     | -    | -    | -    | -              | -    | LY           | 2    | LY           | 1    | LY           | 1    | NT           | 0    | NT           | 0    | LY           | 1    |
| SIN.RV.PGK | 100     | 112          | 256               | LY             | LY           | 3    | 12    | 0.5  | 1.2  | 0.5  | NT             | 0    | NT           | 0    | NT           | 0    | LY           | 1    | NT           | 0    | NT           | 0    | NT           | 0    |
| SIN.RV.PGK | 100     | 104          | 272               | LY-MY          | MY           | 2    | -     | -    | -    | -    | MY             | 3    | MY           | 2    | MY           | 3    | MY           | 3    | MY           | 3    | MY           | 1    | NT           | 0    |
| SIN.RV.PGK | 100     | 109          | 299               | LY             | LY           | 2    | -     | -    | -    | -    | NT             | 0    | LY           | 1    | NT           | 0    | NT           | 0    | LY           | 1    | NT           | 0    | NT           | 0    |
| SIN.RV.PGK | 100     | 89           | 300               | LY             | LY           | 3    | -     | -    | -    | -    | NT             | 0    | LY           | 2    | LY           | 1    | LY           | 2    | NT           | 0    | NT           | 0    | LY           | 1    |
| SIN.RV.PGK | 100     | 93           | 314               | LY             | LY           | 3    | -     | -    | -    | -    | LY             | 3    | LY           | 2    | NT           | 0    | LY           | 2    | NT           | 0    | LY           | 2    | NT           | 0    |
| SIN.RV.PGK | 100     | 110          | 319               | MY             | MY           | 2    | -     | -    | -    | -    | NT             | 0    | MY           | 2    | NT           | 0    | MY           | 2    | MY           | 1    | NT           | 0    | NT           | 0    |
| SIN.RV.PGK | 100     | 87           | 320               | LY             | -            | -    | -     | -    | -    | -    | LY             | 3    | LY           | 3    | NT           | 0    | NT           | 0    | NT           | 0    | -            | -    | -            | -    |
| SIN.RV.PGK | 100     | 98           | 322               | LY             | LY           | 3    | -     | -    | -    | -    |                | 3    | LY           | 2    | LY           | 1    | NT           | 0    | NT           | 0    | NT           | 0    | NT           | 0    |
| SIN.RV.PGK | 100     | 108          | 326               | LY             | LY           | 3    | 1.5   | 0.2  | 7.5  | 99.6 | NT             | 0    | NT           | 0    | LY           | 1    | LY           | 2    | NT           | 0    | -            | -    | NT           | 0    |
| SIN.RV.PGK | 100     | 113          | 326               | LY             | LY           | 3    | 0.6   | 0.2  | 39.3 | 0.6  | -              | -    | LY           | 2    | LY           | 2    | LY           | 3    | NT           | 0    | -            | -    | LY           | 1    |
| SIN.RV.PGK | 100     | 90           | 347               | LY-MY          | MY           | 3    | -     | -    | -    | -    | MY             | 3    | MY           | 3    | MY           | 3    | MY           | 3    | NT           | 0    | NT           | 0    | NT           | 0    |
| SIN.RV.PGK | 100     | 95           | 396               | ND             | -            | -    | -     | -    | -    | -    | -              | -    | -            | -    | -            | -    | -            | -    | -            | -    | -            | -    | -            | -    |
| SIN.RV.PGK | 100     | 106          | 412               | ND             | -            | -    | -     | -    | -    | -    | -              | -    | -            | -    | -            | -    | -            | -    | -            | -    | -            | -    | -            | -    |

| Vector (a) | MOI (b) | Mouse ID (c) | Cell Age Days (e) | Tumor Type (g) | Thymus (m)   |      |       |      |     |     | Lymphonode (n) |      | Liver (o)    |      | Kidney (p)   |      | Lung (q)     |      | Gut (r)      |      | Brain (s)    |      | Heart (t)    |      |
|------------|---------|--------------|-------------------|----------------|--------------|------|-------|------|-----|-----|----------------|------|--------------|------|--------------|------|--------------|------|--------------|------|--------------|------|--------------|------|
|            |         |              |                   |                | Pathol diag. | I.G. | CD11b | CD19 | CD3 | GFP | Pathol diag.   | I.G. | Pathol diag. | I.G. | Pathol diag. | I.G. | Pathol diag. | I.G. | Pathol diag. | I.G. | Pathol diag. | I.G. | Pathol diag. | I.G. |
| SIN.RV.PGK | 100     | 86           | 425               | ND             | -            | -    | -     | -    | -   | -   | -              | -    | -            | -    | -            | -    | -            | -    | -            | -    | -            | -    | -            | -    |

**Supplementary Table 1b:** Tumor phenotype analysis by FACS and histopathology on lymphonodes, liver, kidney, lung, gut, brain and heart from the same mice shown in Table 1a.

Columns from (a) to (g) as in Table 1a. (m), (n), (o), (p), (q), (r), (s), and (t): Histopathological analysis of thymus, lymph nodes, liver, kidney, lung, gut, brain and heart, respectively. For each tissue hematoxylin and eosin-stained sections were analyzed as in 1a. For the thymus the relative percentages of myeloid (CD11b), B (CD19) T (CD3) and GFP+ cells assessed by FACS is also indicated. In tumor free age-matched mice thymus normal levels of myeloid, B- and T-lymphoid cells were  $2\pm 2\%$ ,  $1\pm 3\%$  and  $50\pm 8\%$  respectively. Mice with  $>10\%$  of CD11b+ cells were diagnosed as myeloid tumors (highlighted in red), whereas mice with  $>20\%$  CD19+ or  $>65\%$  CD3+ cells were diagnosed as lymphoid tumor (highlighted in yellow).

**Supplementary Table 2: LV.SF.LTR, SIN.LV.SF and SIN.RV.PGK integrations and nearest genes *in vitro* and in tumors**

| Seq ID | Vector       | Mouse ID | Chr. | Chr. Position | Identical | Transcript ID      | Symbol        | Int. type | ORI  | Dist to tss | Human Ortholog |
|--------|--------------|----------|------|---------------|-----------|--------------------|---------------|-----------|------|-------------|----------------|
| iv352  | LV.SF.LTR na |          | 1    | 6 257409      |           | NM_009826.3        | Rblcc1        | intra     | same | 52666       | RB1CC1         |
| iv588  | LV.SF.LTR na |          | 1    | 9 9901922     |           | NM_013626.3        | Pam           | intra     | opp  | 24116       | PAM            |
| iv333  | LV.SF.LTR na |          | 1    | 1 65233531    |           | NM_178883.5        | Scyl1bp1      | intra     | same | 6785        | SCYL1BP1       |
| iv602  | LV.SF.LTR na |          | 1    | 173996818     |           | NM_153555.1        | Wdr42a        | intra     | same | 12001       | WDR42A         |
| iv351  | LV.SF.LTR na |          | 2    | 1 1100586     |           | NM_008859.2        | Prkcq         | intra     | same | 10351       | PRKCQ          |
| iv522  | LV.SF.LTR na |          | 2    | 1 4582295     |           | NM_023116.3        | Cacnb2        | intra     | same | 60235       | CACNB2         |
| iv475  | LV.SF.LTR na |          | 2    | 1 4664073     |           | NM_023116.3        | Cacnb2        | intra     | same | 142013      | CACNB2         |
| iv344  | LV.SF.LTR na |          | 2    | 4 8081542     |           | NM_007396.3        | Acvr2a        | ups       | opp  | -554624     | ACVR2A         |
| iv613  | LV.SF.LTR na |          | 2    | 7 9377747     |           | NM_080558.3        | Ssfa2         | ups       | same | -58632      | SSFA2          |
| iv418  | LV.SF.LTR na |          | 2    | 1 26619184    |           | NM_023220.1        | 2010106G01Rik | intra     | same | 5492        | PSL2           |
| iv531  | LV.SF.LTR na |          | 3    | 2 8425325     |           | ENSMUST00000074264 | Tnik          | ups       | same | -28962      | TNIK           |
| iv547  | LV.SF.LTR na |          | 4    | 3 432370      |           | NM_028097.3        | Tmem68        | downs     | same | 69545       | TMEM68         |
| iv302  | LV.SF.LTR na |          | 4    | 3 861558      |           | NM_019969.2        | Plag1         | intra     | same | 3971        | PLAG1          |
| iv330  | LV.SF.LTR na |          | 5    | 5 189514      |           | NM_011074.1        | Pftk1         | intra     | same | 196689      | PFTK1          |
| iv555  | LV.SF.LTR na |          | 5    | 6 5911820     |           | NM_001081321.1     | Pds5a         | intra     | same | 65171       | NP_056015.1    |
| iv349  | LV.SF.LTR na |          | 5    | 8 1384636     |           | NM_198702.2        | Lphn3         | ups       | opp  | -711518     | LPN3           |
| iv579  | LV.SF.LTR na |          | 5    | 1 10479865    |           | NM_027922.1        | D5Erd585e     | intra     | same | 8522        | KIAA0692       |
| iv526  | LV.SF.LTR na |          | 5    | 1 15412161    |           | NM_175403.2        | 2410014A08Rik | intra     | opp  | 6984        | KIAA0152       |
| iv433  | LV.SF.LTR na |          | 6    | 5 240180      |           | NM_183308.2        | Pon2          | intra     | opp  | 8193        | PON2           |
| iv445  | LV.SF.LTR na |          | 6    | 8 118343      |           | NM_001037865.1     | Col28a1       | intra     | opp  | 24274       |                |
| iv458  | LV.SF.LTR na |          | 6    | 2 3594443     |           | NM_153163.3        | Cadps2        | intra     | same | 194859      | CADPS2         |
| iv587  | LV.SF.LTR na |          | 6    | 30812215      |           | NM_017478.2        | Copg2         | intra     | opp  | 14706       | TSGA13         |
| iv595  | LV.SF.LTR na |          | 6    | 4 0313251     |           | NM_023538.1        | Agk           | intra     | same | 13115       | AGK            |
| iv500  | LV.SF.LTR na |          | 6    | 4 3357739     |           | NM_013861.3        | Tpk1          | intra     | same | 238043      | TPK1           |

| Seq ID | Vector       | Mouse ID | Chr. | Chr. Position | Identical | Transcript ID  | Symbol        | Int. type | ORI  | Dist to tss | Human Ortholog |
|--------|--------------|----------|------|---------------|-----------|----------------|---------------|-----------|------|-------------|----------------|
| iv505  | LV.SF.LTR na |          | 6 5  | 3429346       |           | NM_172728.2    | Creb5         | ups       | same | -73606      | CREB5          |
| iv424  | LV.SF.LTR na |          | 6 5  | 6831923       |           | NM_026004.2    | Nt5c3         | intra     | same | 21484       | NT5C3          |
| iv525  | LV.SF.LTR na |          | 6 6  | 6017633       |           | NM_027547.2    | Prdm5         | downs     | same | 309093      | PRDM5          |
| iv589  | LV.SF.LTR na |          | 6 1  | 46738693      |           | NM_172734.2    | Stk38l        | downs     | opp  | 56515       | STK38L         |
| iv593  | LV.SF.LTR na |          | 7 5  | 994799        |           | NM_175247.3    | Zfp28         | intra     | opp  | 7479        | ZFP28          |
| iv470  | LV.SF.LTR na |          | 7 5  | 5755739       |           | NM_011370.1    | Cyfp1         | intra     | same | 45445       | CYFIP1         |
| iv338  | LV.SF.LTR na |          | 7 6  | 8617255       |           | NM_001042592.2 | Arrdc4        | intra     | opp  | 5496        | ARRDC4         |
| iv513  | LV.SF.LTR na |          | 7 7  | 9921956       |           | NM_175433.4    | Zfp710        | intra     | same | 22109       | ZNF710         |
| iv607  | LV.SF.LTR na |          | 7 9  | 7067879       |           | NM_010248.1    | Gab2          | intra     | same | 110936      | GAB2           |
| iv473  | LV.SF.LTR na |          | 7 1  | 00337062      |           | NM_001017985.2 | AU020772      | intra     | opp  | 90746       | NP_056346.2    |
| iv306  | LV.SF.LTR na |          | 7 1  | 06458602      |           | NM_146453.1    | Olfir693      | downs     | opp  | 13531       | OR2AG1         |
| iv440  | LV.SF.LTR na |          | 7 1  | 11850802      |           | NM_133758.2    | Usp47         | intra     | opp  | 36115       | USP47          |
| iv578  | LV.SF.LTR na |          | 7 1  | 40826392      |           | NM_026820.2    | Ifitm1        | downs     | opp  | 7846        | XR_018421.1    |
| iv402  | LV.SF.LTR na |          | 8 3  | 7610989       |           | NM_172911.2    | D8Ert82e      | intra     | opp  | 47611       | SG223          |
| iv530  | LV.SF.LTR na |          | 8 7  | 3606542       |           | NM_015816.3    | Lsm4          | intra     | opp  | 4161        | C19orf50       |
| iv450  | LV.SF.LTR na |          | 8    | 74841353      |           | NM_133358.2    | Zfp617        | ups       | same | -10472      |                |
| iv430  | LV.SF.LTR na |          | 9 2  | 8403006       |           | NM_177906.4    | Opcml         | intra     | opp  | 862291      | OPCML          |
| iv401  | LV.SF.LTR na |          | 9 8  | 5534672       |           | NM_001081282.1 | Ibtk          | intra     | opp  | 6205        | IBTK           |
| iv462  | LV.SF.LTR na |          | 9 9  | 2388029       |           | NM_011961.2    | Plod2         | intra     | opp  | 41806       | PLOD2          |
| iv359  | LV.SF.LTR na |          | 9 9  | 4540155       |           | NM_177909.4    | Slc9a9        | intra     | opp  | 60894       | SLC9A9         |
| iv326  | LV.SF.LTR na |          | 9 1  | 08212000      |           | NM_011678.1    | Usp4          | intra     | opp  | 6037        | USP4           |
| iv599  | LV.SF.LTR na |          | 10 7 | 4081756       |           | NM_023115.2    | Pcdh15        | downs     | same | 864573      | PCDH15         |
| iv592  | LV.SF.LTR na |          | 10 7 | 4492812       |           | NM_029781.3    | Rab36         | intra     | opp  | 12007       | RAB36          |
| iv390  | LV.SF.LTR na |          | 10 8 | 0267748       |           | NM_175195.3    | 3110056O03Rik | intra     | same | 9344        | PSL1           |
| iv596  | LV.SF.LTR na |          | 10 9 | 8380104       |           | NM_026482.1    | Atp2b1        | intra     | same | 35246       | ATP2B1         |

| Seq ID | Vector       | Mouse ID | Chr. | Chr. Position | Identical | Transcript ID      | Symbol     | Int. type | ORI  | Dist to tss | Human Ortholog |
|--------|--------------|----------|------|---------------|-----------|--------------------|------------|-----------|------|-------------|----------------|
| iv582  | LV.SF.LTR na |          | 11   | 8 552613      |           | NM_001083587.1     | Tns3       | intra     | opp  | 11925       | TNS3           |
| iv498  | LV.SF.LTR na |          | 12   | 4 9170323     |           | NM_008241.1        | Foxg1      | ups       | same | -1088811    | FOXG1B         |
| iv419  | LV.SF.LTR na |          | 12   | 9 0203953     |           | NM_172544.2        | Nrxn3      | intra     | opp  | 737075      | NRXN3          |
| iv460  | LV.SF.LTR na |          | 12   | 1 11990743    |           | NM_178041.1        | Eif5       | intra     | same | 4834        | IF5            |
| iv427  | LV.SF.LTR na |          | 13   | 1 2463569     |           | NM_144835.4        | Heatr1     | intra     | same | 13861       | HEATR1         |
| iv581  | LV.SF.LTR na |          | 13   | 4 6833269     |           | NM_010617.2        | Kif13a     | intra     | opp  | 107421      | KIF13A         |
| iv353  | LV.SF.LTR na |          | 14   | 3 8549169     |           | NM_008734.2        | Nrg3       | ups       | opp  | -164202     | NRG3           |
| iv474  | LV.SF.LTR na |          | 15   | 5 9242959     |           | NM_026746.2        | Nsmce2     | intra     | same | 39031       | NSMCE2         |
| iv337  | LV.SF.LTR na |          | 15   | 9 8371824     |           | NM_009833.1        | Cent1      | intra     | opp  | 23846       | CCNT1          |
| iv477  | LV.SF.LTR na |          | 16   | 4 9494136     |           | NM_028680.3        | Ift57      | ups       | opp  | -124784     | IFT57          |
| iv535  | LV.SF.LTR na |          | 16   | 7 8364040     |           | NM_025967.2        | D16Ert472e | downs     | opp  | 95199       | C21orf91       |
| iv571  | LV.SF.LTR na |          | 16   | 9 4478301     |           | NM_019543.2        | Pigp       | intra     | opp  | 1512        | PIGP           |
| iv381  | LV.SF.LTR na |          | 17   | 1 7080677     |           | NM_025934.1        | Riok2      | intra     | opp  | 1483        | RIOK2          |
| iv502  | LV.SF.LTR na |          | 17   | 3 0258246     |           | NM_172618.1        | Btbd9      | intra     | opp  | 44935       | BTBD9          |
| iv368  | LV.SF.LTR na |          | 17   | 4 4112356     |           | NM_009820.3        | Runx2      | intra     | opp  | 165326      | RUNX2          |
| iv357  | LV.SF.LTR na |          | 17   | 8 4202515     |           | ENSMUST00000047524 | Thada      | intra     | same | 170243      | THADA          |
| iv604  | LV.SF.LTR na |          | 18   | 4 2207785     |           | NM_172966.2        | Sh3rf2     | intra     | same | 28102       | SH3RF2         |
| iv382  | LV.SF.LTR na |          | 19   | 1 11119412    |           | ENSMUST00000099676 | AW112010   | ups       | opp  | -3969       |                |
| iv576  | LV.SF.LTR na |          | 19   | 2 6744615     |           | NM_011416.2        | Smarca2    | intra     | opp  | 72358       | SMARCA2        |
| iv384  | LV.SF.LTR na |          | 19   | 4 7671393     |           | NM_009289.2        | Slk        | intra     | same | 38063       | SLK            |
| iv577  | LV.SF.LTR na |          | X    | 1 00176340    |           | NM_011276.3        | Rnf12      | intra     | opp  | 7663        | RNF12          |
| 1773   | LV.SF.LTR 3  | 12       | 12   | 9 6145621     |           | NM_201518.2        | Flrt2      | intra     | same | 57536       | FLRT2          |
| 1581   | LV.SF.LTR 2  | 96       | 10   | 6 6559773     |           | ENSMUST00000051446 | Jmjd1c     | ups       | opp  | -21564      | JMJD1C         |
| 1732   | LV.SF.LTR 2  | 95       | 1    | 1 84279090    |           | NM_173378.2        | Trp53bp2   | intra     | same | 33248       | TP53BP2        |
| 1675   | LV.SF.LTR 2  | 94       | 6    | 3 2981371     |           | NM_033079.1        | D6Mm5e     | intra     | opp  | 59304       | NP_620159.2    |

| Seq ID | Vector      | Mouse ID | Chr. | Chr. Position | Identical | Transcript ID    | Symbol  | Int. type | ORI  | Dist to tss | Human Ortholog |
|--------|-------------|----------|------|---------------|-----------|------------------|---------|-----------|------|-------------|----------------|
| 1672   | LV.SF.LTR 2 | 94       | 16   | 5 6744537     |           | NM_019631.3      | Tmem45a | intra     | opp  | 66577       | TMEM45A        |
| 1591   | LV.SF.LTR 2 | 77       | 15   | 7 6477239     |           | NM_019396.2      | Cyhr1   | intra     | opp  | 10077       | Q6ZMK1         |
| 1759   | LV.SF.LTR 2 | 75       | 7    | 51597959      |           | NM_080853.2 Slc1 | 7a6 d   | owns      | same | 107873      | SLC17A6        |
| 1162   | LV.SF.LTR 2 | 75       | 10   | 4 5150008     |           | NM_001031772.1   | Lin28b  | intra     | same | 8608        | LIN28B         |
| 1074   | LV.SF.LTR 2 | 75       | 11   | 1 1077025     |           | NM_177033.3      | Vwc2    | intra     | same | 63006       | VWC2           |
| 1159   | LV.SF.LTR 2 | 75       | 15   | 5 1795991     |           | NM_009009.3      | Rad21   | intra     | opp  | 25645       | RAD21          |
| 1062   | LV.SF.LTR 2 | 74       | 1    | 1 39976672    |           | NM_011210.2      | Ptprc   | intra     | opp  | 15005       | PTPRC          |
| 1056   | LV.SF.LTR 2 | 74       | 3    | 1 0415368     |           | NM_029068.2      | Snx16   | intra     | same | 7251        | SNX16          |
| 1069   | LV.SF.LTR 2 | 74       | 5    | 1 48829188    |           | NM_011908.2      | Ubl3    | intra     | opp  | 33949       | UBL3           |
| 1147   | LV.SF.LTR 2 | 74       | 6    | 24103671      |           | NM_019481.1 Slc1 | 3a1 in  | tra       | same | 14423       | SLC13A1        |
| 1151   | LV.SF.LTR 2 | 74       | 6    | 1 08405127    |           | NM_010585.3      | Itpr1   | intra     | opp  | 226254      | ITPR1          |
| 1152   | LV.SF.LTR 2 | 74       | 15   | 3 4437320     |           | NM_008287.2      | Hrsp12  | intra     | same | 2459        | HRSP12         |
| 1067   | LV.SF.LTR 2 | 74       | 16   | 2 3985541     |           | NM_009744.3      | bcl6    | ups       | opp  | -81580      | BCL6           |
| 1070   | LV.SF.LTR 2 | 74       | 19   | 5 5800134     |           | NM_009333.2      | Tcf7l2  | intra     | same | 4614        | TCF7L2         |
| 1593   | LV.SF.LTR 2 | 72       | 12   | 9 4568209     |           | NM_201518.2      | Flrt2   | ups       | same | -1519876    | FLRT2          |
| 1322   | LV.SF.LTR 2 | 71       | 8    | 1 25859454    |           | NM_001081379.1   | Ankrd11 | intra     | same | 68633       | ANKRD11        |
| 1304   | LV.SF.LTR 2 | 71       | 13   | 5 5270674     | 261;271   | NM_008739.3      | Nsd1    | intra     | same | 51270       | NSD1           |
| 1307   | LV.SF.LTR 2 | 71       | 14   | 3 0877014     |           | NM_030166.3      | Galntl2 | intra     | same | 18902       | GALNTL2        |
| 1283   | LV.SF.LTR 2 | 71       | 17   | 3 1751011     | 261;271   | NM_011406.2      | Slc8a1  | ups       | opp  | -104308     | SLC8A1         |
| 1296   | LV.SF.LTR 2 | 70       | 1    | 9 9721998     |           | NM_013626.3      | Pam     | intra     | opp  | 204040      | PAM            |
| 1300   | LV.SF.LTR 2 | 70       | 6    | 4 5639721     |           | NM_001004357.1   | Cntnap2 | intra     | opp  | 650026      | CNTNAP2        |
| 1765   | LV.SF.LTR 2 | 70       | 10   | 1 17465466    |           | NM_148922.2      | Mdm1    | ups       | same | -79359      | MDM1           |
| 1302   | LV.SF.LTR 2 | 70       | X    | 1 09852822    |           | NM_033605.2      | Dach2   | intra     | same | 437622      | DACH2          |
| 1741   | LV.SF.LTR 2 | 69       | 19   | 3 7428297     |           | NM_010615.1      | Kif11   | ups       | same | -13250      | KIF11          |
| 1818   | LV.SF.LTR 2 | 67       | 1    | 7 134596      |           | NM_183028.3      | Pcmt1   | intra     | same | 55595       | PCMTD1         |

| Seq ID | Vector      | Mouse ID | Chr. | Chr. Position | Identical | Transcript ID         | Symbol        | Int. type | ORI  | Dist to tss | Human Ortholog |
|--------|-------------|----------|------|---------------|-----------|-----------------------|---------------|-----------|------|-------------|----------------|
| 1268   | LV.SF.LTR 2 | 66       | 13   | 7 6572945     |           | NM_001081352.1        | AK129128      | intra     | same | 8209        | KIAA0372       |
| 1265   | LV.SF.LTR 2 | 66       | 16   | 6 7301540     |           | NM_178721.3           | Cadm2         | intra     | same | 237606      | CADM2          |
| 1648   | LV.SF.LTR 2 | 65       | X 1  | 54605441      |           | NM_148945.1           | Rps6ka3       | intra     | opp  | 5216        | RPS6KA3        |
| 1119   | LV.SF.LTR 2 | 64       | 1    | 1 46526930    |           | NM_022881.4           | Rgs18         | intra     | opp  | 10709       | RGS18          |
| 1236   | LV.SF.LTR 2 | 64       | 2    | 177296167     |           | ENSMUST00000099024    | 0610010B08Rik | intra     | opp  | 122434      |                |
| 1105   | LV.SF.LTR 2 | 64       | 18   | 3 8038811     |           | NM_007858.2           | Diap1         | intra     | same | 22574       | DIAPH1         |
| 1102   | LV.SF.LTR 2 | 63       | 18   | 3 9832319     |           | NM_001039173.1        | Dok6          | intra     | opp  | 71015       | DOK6           |
| 1607   | LV.SF.LTR 2 | 62       | 2    | 5 2811633     |           | NM_172409.2           | Fmn12         | intra     | same | 131756      | FMNL2          |
| 1677   | LV.SF.LTR 2 | 62       | 3    | 8 1179207     |           | NM_019971.2           | Pdgfc         | intra     | same | 56864       | PDGFC          |
| 1609   | LV.SF.LTR 2 | 62       | 13   | 1 15954105    |           | NM_008396.2           | Itga2         | downs     | opp  | 98814       | ITGA2          |
| 1601   | LV.SF.LTR 2 | 62       | 19   | 2 6884163     |           | NM_011416.2           | Smarca2       | downs     | same | 211906      | SMARCA2        |
| 1041   | LV.SF.LTR 2 | 61       | 3    | 2 0873024     |           | NM_175086.2           | Agtr1b        | ups       | same | -314774     | AGTR1          |
| 1045   | LV.SF.LTR 2 | 61       | 11   | 9 798936      |           | NM_178259.3           | Abca13        | downs     | opp  | 706991      | ABCA13         |
| 1767   | LV.SF.LTR 2 | 61       | 13   | 5 5270673     | 261;271   | NM_008739.3           | Nsd1          | intra     | same | 51269       | NSD1           |
| 1710   | LV.SF.LTR 2 | 61       | 17   | 3 1751011     | 261;271   | NM_011406.2           | Slc8a1        | ups       | opp  | -104308     | SLC8A1         |
| 1754   | LV.SF.LTR 2 | 59       | 6    | 5 6651316     |           | ENSMUST00000031805    | 5830411G16Rik | intra     | opp  | 6811        | KIAA0241       |
| 1799   | LV.SF.LTR 2 | 58       | 8    | 3 6960129     |           | NM_026067.2           | Thex1         | intra     | opp  | 3869        | THEX1          |
| 1022   | LV.SF.LTR 2 | 57       | 1    | 1 75645846    |           | BC010546.1/ NM_008329 | Ifi204        | intra     | opp  | 103708      | MNDA           |
| 1019   | LV.SF.LTR 2 | 57       | 3    | 7 3797155     |           | NM_009738.3           | bche          | ups       | same | -2814       | BCHE           |
| 1018   | LV.SF.LTR 2 | 57       | 3    | 1 52228052    |           | NM_174868.3           | C030011O14Rik | intra     | opp  | 49724       | FAM73A         |
| 1097   | LV.SF.LTR 2 | 57       | 4    | 3 9493535     |           | NM_001081095.1        | 1700009N14Rik | ups       | same | -145429     | RAN            |
| 1091   | LV.SF.LTR 2 | 57       | 12   | 5 018756      |           | NM_001099628.1        | Atad2b        | intra     | same | 75490       | ATAD2B         |
| 1008   | LV.SF.LTR 2 | 57       | 13   | 1 6993480     |           | NM_138654.2           | 5033411D12Rik | intra     | opp  | 486401      | C7orf10        |
| 996    | LV.SF.LTR 2 | 55       | 2    | 7 5776675     |           | NM_001081228.1        | Ttc30a2       | downs     | opp  | 2343        | Q96NE6         |
| 979    | LV.SF.LTR 2 | 55       | 3    | 6 5468744     |           | NM_026155.3           | Ssr3          | intra     | opp  | 11738       | SSR3           |

| Seq ID | Vector      | Mouse ID | Chr. | Chr. Position | Identical | Transcript ID         | Symbol   | Int. type | ORI  | Dist to tss | Human Ortholog |
|--------|-------------|----------|------|---------------|-----------|-----------------------|----------|-----------|------|-------------|----------------|
| 1205   | LV.SF.LTR 2 | 55       | 11 7 | 4773202       |           | NM_001002764.1        | Smg6     | intra     | same | 31135       | SMG6           |
| 987    | LV.SF.LTR 2 | 55       | 19 4 | 3635234       |           | NM_008699.2           | Nkx2-3   | ups       | opp  | -30402      | NKX2-3         |
| 1785   | LV.SF.LTR 2 | 54       | 11 7 | 7242436       |           | NM_177710.3           | Ssh2     | intra     | same | 209816      | SSH2           |
| 343    | LV.SF.LTR 2 | 30       | 2 3  | 198129        |           | NM_008708.1           | Nmt2     | ups       | opp  | -3431       | NMT2           |
| 278    | LV.SF.LTR 2 | 30       | 3 1  | 4569367       |           | NM_007892.2           | E2f5     | intra     | same | 13952       | E2F5           |
| 359    | LV.SF.LTR 2 | 30       | 4 4  | 4155103       |           | NM_001038993.2        | Rnf38    | intra     | opp  | 34336       | RNF38          |
| 1407   | LV.SF.LTR 2 | 30       | 4 1  | 08802429      |           | NM_007943.2           | Eps15    | intra     | same | 24194       | EPS15          |
| 361    | LV.SF.LTR 2 | 30       | 4 1  | 09291240      |           | NM_007983.2           | Faf1     | intra     | opp  | 116681      | FAF1           |
| 349    | LV.SF.LTR 2 | 30       | 6 3  | 163594        |           | NM_145374.1           | BC020002 | intra     | same | 4365        | NP_061878.3    |
| 373    | LV.SF.LTR 2 | 30       | 8 6  | 4901967       |           | NM_001081215.1        | BC013672 | intra     | opp  | 81736       | NP_060101.2    |
| 353    | LV.SF.LTR 2 | 30       | 13 5 | 427461        |           | NM_011803.2           | Klf6     | ups       | opp  | -433274     | KLF6           |
| 335    | LV.SF.LTR 2 | 30       | 13 1 | 10123259      |           | NM_011056.2           | Pde4d    | intra     | opp  | 348218      | PDE4D          |
| 341    | LV.SF.LTR 2 | 30       | 15 4 | 9365978       |           | NM_001081391.1        | Csmd3    | ups       | same | -861992     | CSMD3          |
| 336    | LV.SF.LTR 2 | 30       | 17 8 | 9734701       |           | ENSMUST00000086423    | Kpna2    | downs     | same | 83941       | KPNA2          |
| 662    | LV.SF.LTR 2 | 29       | 11 1 | 8422438       |           | NM_010789.2           | Meis1    | downs     | same | 496245      | MEIS1          |
| 565    | LV.SF.LTR 2 | 24       | 4 1  | 42475400      |           | NM_001081355.1        | Prdm2    | intra     | same | 3996        | PRDM2          |
| 671    | LV.SF.LTR 2 | 24       | 12 4 | 0545660       |           | NM_007487.3           | Arl4a    | intra     | opp  | 2139        | ARL4A          |
| 1545   | LV.SF.LTR 2 | 14       | 1 4  | 3148311       |           | ENSMUST00000070599    | Fhl2     | ups       | opp  | -7004       | FHL2           |
| 1585   | LV.SF.LTR 2 | 14       | 1 4  | 3933476       |           | NM_009418.2           | Tpp2     | intra     | same | 54923       | TPP2           |
| 1826   | LV.SF.LTR 2 | 14       | 13 5 | 5268300       |           | NM_008739.3           | Nsd1     | intra     | opp  | 48896       | NSD1           |
| 1713   | LV.SF.LTR 2 | 13       | 8 6  | 9800035       |           | ENSMUST00000015051    | BC053440 | intra     | opp  | 10073       | NP_612395.1    |
| 1825   | LV.SF.LTR 2 | 13       | 9 5  | 0349650       |           | NM_025848.2           | sdhd     | intra     | same | 6397        | SDHD           |
| 1638   | LV.SF.LTR 2 | 12       | 1 1  | 09325143      |           | NM_011111.3           | Serpinb2 | ups       | same | -17877      | SERPINB2       |
| 643    | LV.SF.LTR 2 | 12       | 1 1  | 75712030      |           | BC010546.1/ NM_008329 | Ifi204   | intra     | opp  | 37524       | MNDA           |
| 642    | LV.SF.LTR 2 | 12       | 6 3  | 9576935       |           | NM_139294.5           | Braf     | intra     | same | 78135       | BRAF           |

| Seq ID | Vector      | Mouse ID | Chr. | Chr. Position | Identical | Transcript ID      | Symbol        | Int. type | ORI  | Dist to tss | Human Ortholog |
|--------|-------------|----------|------|---------------|-----------|--------------------|---------------|-----------|------|-------------|----------------|
| 1427   | LV.SF.LTR 1 | 91       | 4    | 1 49259496    |           | NM_001085492.1     | Rere          | intra     | same | 133780      | Rere           |
| 1426   | LV.SF.LTR 1 | 91       | 15   | 8 4757338     |           | NM_016714.2        | Nup50         | intra     | opp  | 6144        | NUP50          |
| 252    | LV.SF.LTR 1 | 84       | 10   | 4 0106086     | 182;184   | NM_198164.2        | Cdc216        | intra     | same | 67333       | CDC2L6         |
| 614    | LV.SF.LTR 1 | 84       | 11   | 4 8908149     | 182;184   | NM_010999.2        | Olfr56        | intra     | same | 13993       |                |
| 1412   | LV.SF.LTR 1 | 84       | 17   | 8 0344002     | 182;184   | NM_009231.2        | Sos1          | intra     | opp  | 44777       | SOS1           |
| 1409   | LV.SF.LTR 1 | 84       | 19   | 5 3627540     | 182;184   | NM_007790.2        | Smc3          | ups       | opp  | -26219      | SMC3           |
| 1823   | LV.SF.LTR 1 | 84       | X    | 164545671     | 182;184   | NM_009707.3 ar     | hgap6 in      | tra       | opp  | 406467      | ARHGAP6        |
| 1417   | LV.SF.LTR 1 | 82       | 3    | 1 34614561    |           | ENSMUST00000093973 | Gm421         | ups       | same | -4830978    | NP_940908.1    |
| 717    | LV.SF.LTR 1 | 82       | 10   | 4 0106083     | 182;184   | NM_198164.2        | Cdc216        | intra     | same | 67330       | CDC2L6         |
| 607    | LV.SF.LTR 1 | 82       | 11   | 4 8908149     | 182;184   | NM_010999.2        | Olfr56        | intra     | same | 13993       |                |
| 1416   | LV.SF.LTR 1 | 82       | 17   | 8 0344002     | 182;184   | NM_009231.2        | Sos1          | intra     | opp  | 44777       | SOS1           |
| 1821   | LV.SF.LTR 1 | 82       | 19   | 5 3627540     | 182;184   | NM_007790.2        | Smc3          | ups       | opp  | -26219      | SMC3           |
| 1822   | LV.SF.LTR 1 | 82       | X    | 164545671     | 182;184   | NM_009707.3 ar     | hgap6 in      | tra       | opp  | 406467      | ARHGAP6        |
| 1424   | LV.SF.LTR 1 | 80       | 4    | 8 4479433     |           | NM_175275.3        | D53005L1Rik   | intra     | same | 123875      | C9orf39        |
| 1425   | LV.SF.LTR 1 | 80       | 9    | 8 5492977     |           | NM_001081282.1     | Ibtk          | intra     | opp  | 47900       | IBTK           |
| 1619   | LV.SF.LTR 1 | 79       | 4    | 8 8022787     |           | NM_206870.1        | Ifna14        | downs     | opp  | 6689        | IFNA5          |
| 1422   | LV.SF.LTR 1 | 79       | 16   | 7 8444089     |           | NM_025967.2        | D16Ert472e    | intra     | opp  | 15150       | C21orf91       |
| 1419   | LV.SF.LTR 1 | 76       | 5    | 7 4638097     |           | NM_178672.5        | Scfd2         | downs     | same | 175351      | SCFD2          |
| 1616   | LV.SF.LTR 1 | 73       | 1    | 1 41052145    |           | NM_133239.1        | Crb1          | intra     | opp  | 141307      | CRB1           |
| 582    | LV.SF.LTR 1 | 73       | 5    | 8 6869118     |           | NM_007683.2        | Cenpc1        | downs     | opp  | 270893      | CENPC1         |
| 1421   | LV.SF.LTR 1 | 73       | 10   | 1 2323047     |           | NM_011682.4        | Utrn          | intra     | same | 228878      | UTRN           |
| iv257  | SIN.LV.SF n | a        | 1    | 5 084370      |           | NM_133826.4        | Atp6v1h       | intra     | same | 11116       | ATP6V1H        |
| iv162  | SIN.LV.SF n | a        | 1    | 24650586      |           | NM_026719.2 Lm     | brd1 in       | tra       | opp  | 17767       | LMBRD1         |
| iv150  | SIN.LV.SF n | a        | 1    | 3 4474898     |           | NM_007685.2        | Cfc1          | ups       | opp  | -5296       | CFC1           |
| iv224  | SIN.LV.SF n | a        | 1    | 5 2603445     |           | NM_133829.1        | 2210010L05Rik | intra     | opp  | 50260       | NP_060164.3    |

| Seq ID | Vector      | Mouse ID | Chr. | Chr. Position | Identical | Transcript ID        | Symbol               | Int. type | ORI  | Dist to tss | Human Ortholog |
|--------|-------------|----------|------|---------------|-----------|----------------------|----------------------|-----------|------|-------------|----------------|
| iv133  | SIN.LV.SF n | a        | 1    | 5 6956367     |           | NM_139146.2          | Satb2                | ups       | same | -40488      | SATB2          |
| iv103  | SIN.LV.SF n | a        | 1    | 7 7110364     |           | NM_007936.3          | Epha4                | downs     | opp  | 287872      | EPHA4          |
| iv10   | SIN.LV.SF n | a        | 1    | 1 08430811    |           | NM_009741.3          | Bcl2                 | intra     | opp  | 111026      | BCL2           |
| iv47   | SIN.LV.SF n | a        | 1    | 1 81943317    |           | ENSMUST00000097452.1 | Cdc42bpa             | intra     | same | 107281      | CDC42BPA       |
| iv78   | SIN.LV.SF n | a        | 2    | 3 418490      |           | NM_015765.2          | Hspa14               | intra     | same | 11596       | HSPA14         |
| iv52   | SIN.LV.SF n | a        | 2    | 9 1604219     |           | NM_001080754.1       | D030051N19Rik        | intra     | same | 73242       | NP_060219.2    |
| iv610  | SIN.LV.SF n | a        | 2    | 1 02808146    |           | NM_175094.4          | Pdhx                 | downs     | same | 66204       | PDHX           |
| iv26   | SIN.LV.SF n | a        | 2    | 122135593     |           | NM_172980.2 Slc2     | 8a2 in               | tra       | same | 17675       | SLC28A2        |
| iv614  | SIN.LV.SF n | a        | 3    | 1 9342469     |           | NM_028840.2          | Armc1                | intra     | same | 12747       | ARMC1          |
| iv67   | SIN.LV.SF n | a        | 3    | 6 2569276     |           | NM_028136.1          | Dhx36                | intra     | opp  | 25641       | DHX36          |
| iv3    | SIN.LV.SF n | a        | 3    | 8 9118202     |           | NM_138679.5          | Ash1l                | intra     | same | 66463       | ASH1L          |
| iv59   | SIN.LV.SF n | a        | 3    | 9 0408624     |           | NM_139304.1          | Gatad2b              | ups       | opp  | -18957      | GATAD2B        |
| iv235  | SIN.LV.SF n | a        | 3    | 1 23406215    |           | NM_201638.1          | G430022H21Rik        | ups       | same | -28245      | NP_066012.1    |
| iv274  | SIN.LV.SF n | a        | 3    | 1 35242654    |           | NM_027208.1          | Bdh2                 | downs     | same | 23975       | BDH2           |
| iv15   | SIN.LV.SF n | a        | 3    | 1 36581586    |           | NM_008913.3          | Ppp3ca               | ups       | opp  | -26571      | PPP3CA         |
| iv19   | SIN.LV.SF n | a        | 3    | 1 37127113    |           | NM_016885.1          | Emcn                 | ups       | opp  | -151376     | EMCN           |
| iv142  | SIN.LV.SF n | a        | 3    | 149399909     |           | NM_001033772.2       | LOC381483            | downs     | same | 157694      |                |
| iv172  | SIN.LV.SF n | a        | 4    | 1 2909141     |           | NM_173746.2          | ENSMUSG00000055963 d | owns      | same | 75136       | Q629K1         |
| iv120  | SIN.LV.SF n | a        | 4    | 4 9266539     |           | NM_178756.4          | E130309F12Rik        | intra     | same | 185977      | NP_060223.2    |
| iv29   | SIN.LV.SF n | a        | 4    | 9 6026436     |           | NM_010008.3          | Cyp2j6               | intra     | opp  | 19233       | CYP2J2         |
| iv77   | SIN.LV.SF n | a        | 4    | 1 14173223    |           | NM_001085549.1       | OTTMUSG00000008561 d | owns      | same | 268567      |                |
| iv277  | SIN.LV.SF n | a        | 5    | 5 182228      |           | NM_011074.1          | Pftk1                | intra     | opp  | 203975      | PFTK1          |
| iv286  | SIN.LV.SF n | a        | 5    | 4 2101003     |           | NM_001081422.1       | LOC665775            | intra     | same | 31560       | FAM44A         |
| iv253  | SIN.LV.SF n | a        | 5    | 4 6899628     |           | NM_178142.3          | Lcorl                | ups       | same | -753874     | LCORL          |

| Seq ID | Vector      | Mouse ID | Chr. | Chr. Position | Identical | Transcript ID        | Symbol  | Int. type | ORI  | Dist to tss | Human Ortholog |
|--------|-------------|----------|------|---------------|-----------|----------------------|---------|-----------|------|-------------|----------------|
| iv93   | SIN.LV.SF n | a        | 5 4  | 8471934       |           | NM_178804.2          | Slit2   | intra     | same | 198893      | SLIT2          |
| iv279  | SIN.LV.SF n | a        | 5 5  | 2452817       |           | NM_007839.2          | Dhx15   | intra     | same | 25950       | DHX15          |
| iv66   | SIN.LV.SF n | a        | 5 9  | 6506590       |           | NM_053158.2          | Mrpl1   | intra     | opp  | 56173       | MRPL1          |
| iv202  | SIN.LV.SF n | a        | 5 1  | 05711854      |           | NM_001033550.1       | Lrrc8b  | intra     | same | 55777       | LRRC8B         |
| iv205  | SIN.LV.SF n | a        | 5 1  | 16150115      |           | NM_007708.3          | Cit     | intra     | same | 43460       | CIT            |
| iv584  | SIN.LV.SF n | a        | 5 1  | 23149633      |           | NM_001005866.1       | Fbxl10  | intra     | same | 99517       | FBXL10         |
| iv137  | SIN.LV.SF n | a        | 5 1  | 23303113      |           | NM_029112.1          | Morn3   | intra     | opp  | 4324        | MORN3          |
| iv102  | SIN.LV.SF n | a        | 5 1  | 39491841      |           | NM_024451.1          | Unc84a  | intra     | same | 37529       | UNC84A         |
| iv117  | SIN.LV.SF n | a        | 6 1  | 1878770       |           | NM_029404.2          | Phf14   | intra     | opp  | 2889        | PHF14          |
| iv282  | SIN.LV.SF n | a        | 6 4  | 3481800       |           | NM_013861.3          | Tpk1    | intra     | opp  | 113982      | TPK1           |
| iv161  | SIN.LV.SF n | a        | 6 9  | 9369581       |           | NM_053202.1          | Foxp1   | ups       | same | -241100     | FOXP1          |
| iv219  | SIN.LV.SF n | a        | 6 1  | 08117774      |           | NM_145937.2          | Sumf1   | intra     | opp  | 33583       | SUMF1          |
| iv87   | SIN.LV.SF n | a        | 7 5  | 742020        |           | NM_001013012.1       | Zfp787  | intra     | opp  | 17038       | ZNF787         |
| iv107  | SIN.LV.SF n | a        | 7 8  | 8285100       |           | NM_028238.6          | Rab38   | ups       | same | -20365      | RAB38          |
| iv216  | SIN.LV.SF n | a        | 8 3  | 2693394       |           | NM_134161.2          | fut10   | intra     | opp  | 40127       | FUT10          |
| iv90   | SIN.LV.SF n | a        | 8 4  | 8082564       |           | NM_001001184.1       | Ccdc111 | intra     | opp  | 33453       | CCDC111        |
| iv241  | SIN.LV.SF n | a        | 8 4  | 8310164       |           | NM_008391.3          | Irf2    | intra     | same | 71572       | IRF2           |
| iv125  | SIN.LV.SF n | a        | 8 8  | 2593636       |           | NM_015751.2          | Abce1   | intra     | opp  | 14176       | ABCE1          |
| iv65   | SIN.LV.SF n | a        | 9 4  | 1607449       |           | NM_011436.3          | Sorl1   | downs     | same | 267835      | SORL1          |
| iv89   | SIN.LV.SF n | a        | 9 6  | 9199914       |           | NM_145618.3          | Narg2   | intra     | same | 2752        | NARG2          |
| iv104  | SIN.LV.SF n | a        | 9 1  | 15657576      |           | ENSMUST00000084841   | Gadl1   | ups       | opp  | -100577     | GADL1          |
| iv79   | SIN.LV.SF n | a        | 10 9 | 473562        |           | NM_001081344.1       | Stxbp5  | intra     | same | 117311      | STXBP5         |
| iv60   | SIN.LV.SF n | a        | 10 4 | 1505155       |           | ENSMUST00000099931.1 | Sesn1   | intra     | same | 6166        | SESN1          |
| iv244  | SIN.LV.SF n | a        | 10 7 | 6741987       |           | NM_001024837.1       | Adarb1  | intra     | same | 120002      | ADARB1         |
| iv55   | SIN.LV.SF n | a        | 10 8 | 5445209       |           | NM_177772.3          | Bpil2   | ups       | same | -3560       | FBXO7          |

| Seq ID | Vector      | Mouse ID | Chr. | Chr. Position | Identical | Transcript ID        | Symbol                | Int. type  | ORI  | Dist to tss | Human Ortholog |
|--------|-------------|----------|------|---------------|-----------|----------------------|-----------------------|------------|------|-------------|----------------|
| iv170  | SIN.LV.SF n | a        | 10   | 1 07583981    |           | NM_027892.1          | Ppp1r12a              | intra      | opp  | 17471       | PPP1R12A       |
| iv25   | SIN.LV.SF n | a        | 11   | 6 079733      |           | NM_173748.3          | Nudcd3                | intra      | same | 20432       | NUDCD3         |
| iv62   | SIN.LV.SF n | a        | 11   | 1 8851411     |           | NM_010789.2          | Meis1                 | intra      | opp  | 67272       | MEIS1          |
| iv153  | SIN.LV.SF n | a        | 11   | 97494097      |           | NM_139311.2 Mlt6     |                       | intra same | e    | 14595       | MLLT6          |
| iv239  | SIN.LV.SF n | a        | 11   | 1 08434070    |           | NM_029606.3          | Ccdc46                | intra      | opp  | 192714      | CCDC46         |
| iv43   | SIN.LV.SF n | a        | 12   | 3467197       |           | NM_172421.3          | Asxl2                 | intra      | opp  | 40313       | ASXL2          |
| iv70   | SIN.LV.SF n | a        | 12   | 9 1139492     |           | NM_010050.2          | Dio2                  | intra      | same | 4336        | DIO2           |
| iv82   | SIN.LV.SF n | a        | 12   | 9 1762370     |           | NM_181815.2          | 4930534B04Rik         | intra      | same | 27565       | C14orf145      |
| iv179  | SIN.LV.SF n | a        | 12   | 1 19560078    |           | NM_177290.3          | Itgb8                 | downs      | opp  | 122300      | ITGB8          |
| iv248  | SIN.LV.SF n | a        | 13   | 21175536      |           | NM_009054.2          | Trim27                | ups        | same | -11888      | TRIM27         |
| iv18   | SIN.LV.SF n | a        | 13   | 2 9806255     |           | NM_144536.2          | Cdkal1                | intra      | opp  | 56798       | CDKAL1         |
| iv255  | SIN.LV.SF n | a        | 13   | 3 0948688     |           | NM_025588.2          | Exoc2                 | intra      | opp  | 32824       | EXOC2          |
| iv57   | SIN.LV.SF n | a        | 13   | 1 18008088    |           | NM_001081009.1       | parp8                 | intra      | same | 136709      | PARP8          |
| iv122  | SIN.LV.SF n | a        | 14   | 18209554      |           | NM_001024706.1       | EG432825              | downs      | same | 183729      |                |
| iv169  | SIN.LV.SF n | a        | 14   | 20378017      |           | NM_017479.2          | Myst4                 | intra      | same | 89611       | MYST4          |
| iv189  | SIN.LV.SF n | a        | 14   | 4 9724683     |           | NM_009632.2          | Parp2                 | ups        | same | -5214       | PARP2          |
| iv204  | SIN.LV.SF n | a        | 14   | 3 5741880     |           | NM_019670.1          | Diap3                 | intra      | opp  | 230981      | DIAPH3         |
| iv222  | SIN.LV.SF n | a        | 14   | 103921395     |           | NM_134077.4          | Rbm26                 | downs      | same | 141611      | RBM26          |
| iv609  | SIN.LV.SF n | a        | 14   | 1 22560518    |           | NM_177393.4          | Nalcn                 | intra      | opp  | 201806      | NALCN          |
| iv601  | SIN.LV.SF n | a        | 15   | 6 282443      |           | NM_001008702.1       | Dab2                  | intra      | same | 35379       | DAB2           |
| iv203  | SIN.LV.SF n | a        | 15   | 9 531478      |           | ENSMUST00000077670.4 | ENSMUSG00000063249 in | tra        | opp  | 14201       | NP_653323.1    |
| iv263  | SIN.LV.SF n | a        | 15   | 3 7947473     |           | NM_001081359.1       | Edd1                  | intra      | same | 75969       | EDD1           |
| iv586  | SIN.LV.SF n | a        | 15   | 57798207      |           | NM_001081396.1       | Wdr67                 | intra      | opp  | 55925       | WDR67          |
| iv251  | SIN.LV.SF n | a        | 16   | 1 7300470     |           | NM_001001983.1       | Pik4ca                | intra      | same | 19407       | PIK4CA         |
| iv184  | SIN.LV.SF n | a        | 16   | 9 0916149     |           | ENSMUST00000023698.3 | 1810007M14Rik         | intra      | same | 16874       | C21orf66       |

| Seq ID | Vector      | Mouse ID | Chr.     | Chr. Position | Identical | Transcript ID      | Symbol        | Int. type | ORI  | Dist to tss | Human Ortholog |
|--------|-------------|----------|----------|---------------|-----------|--------------------|---------------|-----------|------|-------------|----------------|
| iv237  | SIN.LV.SF n | a        | 17 2     | 5716668       |           | ENSMUST00000075024 | Rab11fip3     | intra     | same | 79550       | RAB11FIP3      |
| iv181  | SIN.LV.SF n | a        | 17 5     | 3094749       |           | NM_020005.3        | Pcaf          | intra     | opp  | 62505       | PCAF           |
| iv22   | SIN.LV.SF n | a        | 17       | 58634361      |           | NM_027001.1        | 2610034M16Rik | intra     | opp  | 42345       |                |
| iv600  | SIN.LV.SF n | a        | 17 5     | 9711119       |           | NM_026497.2        | Nudt12        | downs     | opp  | 1024387     | NUTD12         |
| iv198  | SIN.LV.SF n | a        | 17 9     | 0279927       |           | NM_020252.2        | Nrxn1         | intra     | opp  | 721194      | NRXN1          |
| iv254  | SIN.LV.SF n | a        | 18 4     | 6672752       |           | NM_173394.2        | Ticam2        | downs     | same | 27111       | TICAM2         |
| iv45   | SIN.LV.SF n | a        | 18 6     | 7979968       |           | ENSMUST00000025425 | Cep192        | intra     | opp  | 498         | SEH1L          |
| iv597  | SIN.LV.SF n | a        | 18 7     | 5782820       |           | NM_201354.2        | Gm672         | intra     | opp  | 40241       | KIAA0427       |
| iv14   | SIN.LV.SF n | a        | 18 8     | 9146210       |           | NM_175542.3        | Rttm          | intra     | same | 40227       | RTTN           |
| iv127  | SIN.LV.SF n | a        | 19 3     | 7035381       |           | NM_001080706.1     | Btaf1         | intra     | opp  | 44158       | BTAF1          |
| iv590  | SIN.LV.SF n | a        | Un ran   | 21495         |           | NM_011515.3        | Sybl1         | intra     | same | 17653       | SYBL1          |
| iv6    | SIN.LV.SF n | a        | X 3      | 8117738       |           | NM_001033422.1     | Thoc2         | intra     | opp  | 38790       | THOC2          |
| 1665   | SIN.LV.SF 3 | 11       | 8 6      | 4845285       | 301;311   | NM_001081215.1     | BC013672      | intra     | same | 25054       | NP_060101.2    |
| 1486   | SIN.LV.SF 3 | 10       | 11 4     | 071240        |           | NM_026175.4        | Sf3a1         | intra     | same | 10869       | SF3A1          |
| 1774   | SIN.LV.SF 3 | 09       | 10 1     | 8043031       |           | NM_173390.3        | Nhsl1         | ups       | opp  | -54060      | NHSL1          |
| 1625   | SIN.LV.SF 3 | 06       | 11 1     | 15514640      |           | NM_008163.3        | Grb2          | intra     | same | 10047       | GRB2           |
| 1587   | SIN.LV.SF 3 | 05       | 18 6     | 229335        |           | NM_008448.2        | Kif5b         | intra     | same | 12163       | KIF5B          |
| 1549   | SIN.LV.SF 3 | 03       | 6 6      | 6199140       |           | NM_019499.4        | Mad2l1        | ups       | same | -265906     | MAD2L1         |
| 1653   | SIN.LV.SF 3 | 03       | 14 3     | 1011583       |           | NM_016897.1        | Timm23        | intra     | opp  | 19297       | Q5SRD2         |
| 1804   | SIN.LV.SF 3 | 03       | 15 4     | 759496        |           | NM_016704.1        | C6            | downs     | same | 82284       | C6             |
| 1553   | SIN.LV.SF 3 | 02       | Un ran 1 | 257668        | 207;302   | NM_001033326.2     | Dhrsx         | ups       | same | -2347       | DHRSX          |
| 1724   | SIN.LV.SF 3 | 01       | 8 6      | 4845285       | 301;311   | NM_001081215.1     | BC013672      | intra     | same | 25054       | NP_060101.2    |
| 1722   | SIN.LV.SF 3 | 01       | 9 2      | 2396737       |           | NM_181316.3        | Bbs9          | intra     | same | 170620      | BBS9           |
| 1720   | SIN.LV.SF 3 | 01       | 12 7     | 4113629       |           | NM_008612.2        | Mnat1         | intra     | same | 71074       | MNAT1          |
| 1556   | SIN.LV.SF 3 | 01       | X 6      | 7492014       |           | NM_019926.2        | Mtm1          | intra     | same | 16376       | MTM1           |

| Seq ID | Vector      | Mouse ID | Chr. | Chr. Position | Identical | Transcript ID      | Symbol        | Int. type | ORI  | Dist to tss | Human Ortholog |
|--------|-------------|----------|------|---------------|-----------|--------------------|---------------|-----------|------|-------------|----------------|
| 1574   | SIN.LV.SF 2 | 99       | 7    | 9328334       |           | NM_017462.2        | Polg          | intra     | same | 11452       | POLG           |
| 1477   | SIN.LV.SF 2 | 98       | 4    | 19964347      |           | NM_013883.1        | Scmh1         | intra     | opp  | 61303       | SCMH1          |
| 1689   | SIN.LV.SF 2 | 38       | 2    | 424882        |           | NM_008091.2        | Gata3         | downs     | opp  | 370747      | GATA3          |
| 1358   | SIN.LV.SF 2 | 38       | 16   | 7012585       |           | NM_029977.1        | Polq          | intra     | same | 81560       | POLQ           |
| 1357   | SIN.LV.SF 2 | 38       | 16   | 4727705       |           | NM_028059.2        | Zfp654        | intra     | opp  | 818         | ZNF654         |
| 1368   | SIN.LV.SF 2 | 37       | 6    | 5017171       |           | NM_007958.1        | Smardc1       | intra     | opp  | 44926       | SMARCAD1       |
| 1360   | SIN.LV.SF 2 | 36       | 5    | 4460202       |           | NM_001081103.1     | Stim2         | downs     | opp  | 173384      | STIM2          |
| 1442   | SIN.LV.SF 2 | 22       | 2    | 65450012      |           | NM_010165.2        | Eya2          | intra     | opp  | 103509      | EYA2           |
| 1395   | SIN.LV.SF 2 | 22       | 4    | 4825320       |           | NM_177027.3        | Zcchc7        | intra     | opp  | 47652       |                |
| 1346   | SIN.LV.SF 2 | 22       | 13   | 3614055       |           | NM_173392.3        | Zfyve16       | intra     | same | 17498       | ZFYVE16        |
| 1403   | SIN.LV.SF 2 | 20       | 1    | 150790935     |           | NM_008869.3 Pla2   | g4a d         | owns      | same | 932567      | PLA2G4A        |
| 190    | SIN.LV.SF 2 | 20       | 1    | 81262583      |           | NM_027188.3        | smyd3         | intra     | opp  | 92095       | SMYD3          |
| 181    | SIN.LV.SF 2 | 20       | 10   | 25404318      |           | NM_177152.4        | Lrig3         | intra     | opp  | 35093       | LRIG3          |
| 192    | SIN.LV.SF 2 | 20       | 11   | 0108654       |           | NM_008996.3        | Rab1          | intra     | opp  | 7049        | RAB1A          |
| 1378   | SIN.LV.SF 2 | 20       | 13   | 0883763       |           | NM_178098.2        | 4930486L24Rik | ups       | same | -9724       | CTSL1          |
| 1621   | SIN.LV.SF 2 | 19       | 8    | 67120989      |           | NM_009390.2 Tll1   |               | ups opp   |      | -22804      | TLL1           |
| 1493   | SIN.LV.SF 2 | 19       | 9    | 3352799       |           | ENSMUST00000034401 | Maml2         | ups       | opp  | -17588      | MAML2          |
| 1370   | SIN.LV.SF 2 | 15       | 1    | 2578759       |           | NM_007734.2        | Col4a3        | intra     | opp  | 112814      | COL4A3         |
| 1373   | SIN.LV.SF 2 | 15       | 1    | 89741621      |           | NM_011935.2        | Esrrg         | intra     | opp  | 42974       | ESRRG          |
| 1372   | SIN.LV.SF 2 | 15       | 2    | 6131055       |           | NM_178725.4        | Lrrc4c        | ups       | opp  | -1137441    | LRRC4C         |
| 1392   | SIN.LV.SF 2 | 15       | 5    | 0364878       |           | NM_172992.2        | Phtf2         | intra     | same | 28972       | PHTF2          |
| 1369   | SIN.LV.SF 2 | 15       | 14   | 6833990       |           | NM_172605.2        | Tdrd3         | downs     | opp  | 585561      | TDRD3          |
| 450    | SIN.LV.SF 2 | 10       | 6    | 22719243      |           | NM_011401.3        | Slc2a3        | ups       | opp  | -11105      |                |
| 1355   | SIN.LV.SF 2 | 10       | 13   | 6594289       |           | NM_001081352.1     | AK129128      | intra     | same | 29553       | KIAA0372       |
| 1437   | SIN.LV.SF 2 | 10       | 14   | 9187515       |           | NM_177816.3        | Sh2d4b        | downs     | opp  | 614163      | SH2D4B         |

| Seq ID | Vector      | Mouse ID | Chr.     | Chr. Position | Identical | Transcript ID             | Symbol        | Int. type  | ORI  | Dist to tss | Human Ortholog |
|--------|-------------|----------|----------|---------------|-----------|---------------------------|---------------|------------|------|-------------|----------------|
| 1438   | SIN.LV.SF 2 | 10       | 16 4     | 2792446       |           | BC056446/NM_019778        | Zbtb20        | ups        | opp  | -34559      | ZBTB20         |
| 1356   | SIN.LV.SF 2 | 10       | X 7      | 1898162       |           | NM_175122.4               | Rab39b        | ups        | same | -67238      | RAB39B         |
| 1667   | SIN.LV.SF 2 | 09       | 2 5      | 8018992       |           | NM_139200.4               | Pscdbp        | ups        | opp  | -43484      | PSCDBP         |
| 1668   | SIN.LV.SF 2 | 09       | 10 1     | 10691113      |           | NM_001003717.1            | Osbpl8        | intra      | opp  | 122201      | OSBPL8         |
| 1435   | SIN.LV.SF 2 | 09       | X        | 104012778     |           | NM_025921.2               | 2610002M06Rik | intra      | opp  | 6222        |                |
| 1431   | SIN.LV.SF 2 | 07       | 4 1      | 54373542      |           | NM_008142.3               | Gnb1          | intra      | opp  | 2292        | GNB1           |
| 1389   | SIN.LV.SF 2 | 07       | 5 3      | 3143972       |           | NM_194340.1               | C330019G07Rik | intra      | opp  | 560         | C22orf30       |
| 1448   | SIN.LV.SF 2 | 07       | 5 5      | 2456831       |           | NM_007839.2               | Dhx15         | intra      | same | 21936       | DHX15          |
| 1447   | SIN.LV.SF 2 | 07       | 10 3     | 0499589       |           | NM_172495.3               | Ncoa7         | ups        | opp  | -7235       | NCOA7          |
| 1352   | SIN.LV.SF 2 | 07       | 10 7     | 9513262       |           | NM_011492.3               | Stk11         | ups        | opp  | -6403       | STK11          |
| 519    | SIN.LV.SF 2 | 07       | 12 1     | 3421078       |           | ENSMUST00000042953        | BC072598      | intra      | same | 72102       | NP_056993.2    |
| 1449   | SIN.LV.SF 2 | 07       | 14 1     | 20048561      |           | NM_023579.4               | Ranbp5        | intra      | opp  | 2187        | RANBP5         |
| 1388   | SIN.LV.SF 2 | 07       | 17 7     | 9791884       |           | NM_019717.2               | Arl6ip2       | intra      | same | 12470       | ARL6IP2        |
| 1350   | SIN.LV.SF 2 | 07       | 17 9     | 2710388       |           | NM_001025309.1            | Pja2          | ups        | opp  | -361788     | PJA2           |
| 509    | SIN.LV.SF 2 | 07       | Un_ran 1 | 257668        | 207;302   | NM_001033326.2            | Dhrsx         | ups        | same | -2347       | DHRSX          |
| 1383   | SIN.LV.SF 2 | 06       | 1 6      | 8632148       |           | NM_010154.1               | Erbp4         | intra      | same | 409119      | ERBP4          |
| 1386   | SIN.LV.SF 2 | 06       | 2 7      | 0528811       |           | NM_172664.2               | Tlk1          | intra      | opp  | 97508       | TLK1           |
| 1385   | SIN.LV.SF 2 | 06       | 2 1      | 41965497      |           | NM_001013802.2            | LOC433479     | intra      | opp  | 1878626     | C20orf133      |
| 830    | SIN.LV.SF 2 | 06       | 3 1      | 26811114      |           | NM_001025438.1            | camk2d        | intra      | same | 222119      | CAMK2D         |
| 808    | SIN.LV.SF 2 | 06       | 4 7      | 7697427       |           | NM_011211.2               | Ptprd         | ups        | opp  | -1631897    | PTPRD          |
| 1384   | SIN.LV.SF 2 | 06       | 8 1      | 1623901       |           | NM_133971.1               | Ankrd10       | intra      | same | 11760       | ANKRD10        |
| 834    | SIN.LV.SF 2 | 06       | 12 1     | 5594742       |           | NM_144551.5               | trib2         | downs      | same | 247593      | TRIB2          |
| 823    | SIN.LV.SF 2 | 06       | 17 6     | 2987589       |           | ENSMUST00000024761        | Fbxl17        | intra      | same | 197173      | FBXL17         |
| 863    | SIN.LV.SF 2 | 06       | 19 1     | 10595581      |           | NM_172302.2 5730453116Rik |               | intra same | e    | 3270        | CPSF7          |
| 1367   | SIN.LV.SF 2 | 06       | X 9      | 700632        |           | NM_019634.2               | Tspan7        | intra      | opp  | 58557       | TSPAN7         |

| Seq ID | Vector      | Mouse ID | Chr.     | Chr. Position | Identical | Transcript ID      | Symbol        | Int. type | ORI  | Dist to tss | Human Ortholog |
|--------|-------------|----------|----------|---------------|-----------|--------------------|---------------|-----------|------|-------------|----------------|
| 1398   | SIN.LV.SF 1 | 98       | 13       | 6 3246179     |           | NM_028079.2        | 2010111I01Rik | intra     | opp  | 221622      | C9orf3         |
| 1      | SIN.LV.SF 1 | 98       | 13       | 8 5676081     |           | NM_023243.4        | CcnH          | intra     | same | 13494       | CCNH           |
| 55     | SIN.LV.SF 1 | 98       | 16       | 7 0230655     |           | NM_028803.3        | Gbe1          | intra     | opp  | 33888       | GBE1           |
| 1381   | SIN.LV.SF 1 | 94       | 1        | 8 4711637     |           | NM_133975.4        | Trip12        | intra     | same | 6692        | TRIP12         |
| 1361   | SIN.LV.SF 1 | 94       | 5        | 3 736255      |           | NM_001003909       | Ankib1        | intra     | same | 72676       | ANKIB1         |
| 1362   | SIN.LV.SF 1 | 94       | 13       | 2 3126631     |           | NM_134239.1        | V1rh14        | ups       | opp  | -4436       | V1rh14         |
| 1348   | SIN.LV.SF 1 | 90       | 6        | 6 6381652     |           | NM_019499.4        | Mad2l1        | ups       | same | -83394      | MAD2L1         |
| 1347   | SIN.LV.SF 1 | 90       | X 7      | 1690124       |           | NM_145956.3        | Brcc3         | intra     | opp  | 20704       | BRCC3          |
| 1380   | SIN.LV.SF 1 | 87       | 15       | 5 0592163     |           | NM_032000.1        | Trps1         | intra     | opp  | 127952      | TRPS1          |
| 1349   | SIN.LV.SF 1 | 86       | 8        | 8 2597737     |           | NM_015751.2        | Abce1         | intra     | same | 10075       | ABCE1          |
| 28     | SIN.LV.SF 1 | 74       | 7        | 106249746     |           | NM_001001318.2     | EG209380      | ups       | same | -15024      |                |
| 43     | SIN.LV.SF 1 | 74       | 9        | 5 9601618     |           | ENSMUST00000085572 | Myo9a         | intra     | same | 23998       | MYO9A          |
| 86     | SIN.LV.SF 1 | 74       | 11       | 25023562      |           | ENSMUST00000044347 | 4933427E13Rik | ups       | same | -206395     |                |
| 1428   | SIN.LV.SF 1 | 74       | 11       | 1 10135208    |           | NM_147219.2        | Abca5         | intra     | opp  | 18598       | ABCA5          |
| 310    | SIN.LV.SF 1 | 74       | 18       | 6 7807634     |           | NM_008977.2        | Ptpn2         | intra     | opp  | 42312       | PTPN2          |
| 1430   | SIN.LV.SF 1 | 74       | Un_ran 1 | 255607        |           | NM_001033326.2     | Dhsrx         | ups       | opp  | -4408       | DHRX           |
| 317    | SIN.LV.SF 1 | 74       | X 1      | 61831793      |           | NM_019773          | rab9          | ups       | opp  | -7998       | RAB9A          |
| ivR201 | SINRV.PGK n | .a.      | 1        | 38720601      |           | NM_010678.2        | Aff3          | intra     | opp  | 1199        | AFF3           |
| ivR208 | SINRV.PGK n | n.a.     | 1        | 135698078     |           |                    | Atp2b4        | ups       | same | -747        | ATP2B4         |
| ivR135 | SINRV.PGK n | .a.      | 1        | 193398483     |           | NM_029766          | Dtl           | intra     | opp  | 930         | DTL            |
| ivR279 | SINRV.PGK n | .a.      | 2        | 6629496       |           | NM_001110228,      | Cugbp2        | intra     | opp  | 176546      | CUGBP2         |
| ivR294 | SINRV.PGK n | .a.      | 2        | 18812842      |           | NM_008845.4        | Pip4k2a       | intra     | same | 106906      | PIP4K2A        |
| ivR291 | SINRV.PGK n | .a.      | 2        | 18883468      |           | NM_008845.4        | Pip4k2a       | intra     | opp  | 36280       | PIP4K2A        |
| ivR141 | SINRV.PGK n | .a.      | 2        | 27333567      |           | NM_080848.1        | Wdr5          | intra     | opp  | 319797      | WDR5           |
| ivR74  | SINRV.PGK n | .a.      | 2        | 28457034      |           | NM_008114.2        | Gfi1b         | downs     | same | 20431       | GF11B          |

| Seq ID | Vector      | Mouse ID | Chr. | Chr. Position | Identical | Transcript ID                 | Symbol        | Int. type | ORI  | Dist to tss | Human Ortholog |
|--------|-------------|----------|------|---------------|-----------|-------------------------------|---------------|-----------|------|-------------|----------------|
| ivR286 | SINRV.PGK n | .a.      | 2    | 29919439      |           | NM_023871.3                   | Set           | intra     | opp  | 7875        | SET            |
| ivR126 | SINRV.PGK n | .a.      | 2    | 32349762      |           | NM_194335.2                   | 4933440H19Rik | downs     | same | 43786       | C9orf90        |
| ivR29  | SINRV.PGK n | .a.      | 2    | 34818251      |           | NM_009421,                    | Traf1         | ups       | same | -959        | TRAF1          |
| ivR104 | SINRV.PGK n | .a.      | 2    | 38375816      |           | NM_021606.2                   | Nek6          | intra     | opp  | 8597        | NEK6           |
| ivR126 | SINRV.PGK n | .a.      | 2    | 45134386      |           | NM_007396,                    | Acvr2a        | ups       | opp  | -3535242    | ACVR2A         |
| ivR295 | SINRV.PGK n | .a.      | 2    | 62295639      |           | NM_008100,                    | Gcg           | downs     | opp  | 26071       | GCG            |
| ivR55  | SINRV.PGK n | .a.      | 2    | 80787464      |           | NM_027091.2                   | Nup35         | downs     | opp  | 308492      | NUP35          |
| ivR60  | SINRV.PGK n | .a.      | 2    | 130952662     |           | NM_028306.3                   | Hspa12b       | ups       | same | -485        | HSPA12B        |
| ivR16  | SINRV.PGK n | .a.      | 2    | 144013221     |           | NM_024225.4                   | Snx5          | downs     | same | 83046       | SNX5           |
| ivR183 | SINRV.PGK n | .a.      | 2    | 160526740     |           | NM_009408.2                   | Top1          | intra     | same | 55108       | TOP1           |
| ivR98  | SINRV.PGK n | .a.      | 2    | 169979948     |           | NM_001033299.2                | Zfp217        | ups       | opp  | -23228      | ZNF217         |
| ivR63  | SINRV.PGK n | .a.      | 3    | 8676945       |           | NM_010423.2                   | Hey1          | ups       | opp  | -9907       | HEY1           |
| ivR259 | SINRV.PGK n | .a.      | 3    | 65762696      |           | NM_019937,                    | Ccnl1         | ups       | opp  | -549        | CCNL1          |
| ivR127 | SINRV.PGK n | .a.      | 3    | 95117151      |           | NM_029789.1                   | Lass2         | ups       | opp  | -2022       | LASS2          |
| ivR237 | SINRV.PGK n | .a.      | 3    | 95755708      |           | NM_023210.3                   | Anp32e        | downs     | opp  | 22495       | ANP32E         |
| ivR164 | SINRV.PGK n | .a.      | 3    | 116136856     |           | NM_001080818.1                | Cdc14a        | ups       | opp  | -9906       | CDC14A         |
| ivR9   | SINRV.PGK n | .a.      | 3    | 137618459     |           | NM_011932.2                   | Dapp1         | intra     | opp  | 26054       | DAPP1          |
| ivR166 | SINRV.PGK n | .a.      | 3    | 137625846     |           | NM_011932.2                   | Dapp1         | intra     | opp  | 18667       | DAPP1          |
| ivR246 | SINRV.PGK n | .a.      | 3    | 155624637     |           | NM_001039094.2<br>NM_177274.3 | Negr1         | ups       | opp  | -600120     | NEGR1          |
| ivR63  | SINRV.PGK   | n.a.     | 4    | 59449788      |           |                               | LOC634731     | intra     | same | 1694        | SUSD1          |
| ivR239 | SINRV.PGK n | .a.      | 4    | 59817199      |           | NM_172468.2                   | Snx30         | ups       | opp  | -1322       | SNX30          |
| ivR37  | SINRV.PGK n | .a.      | 4    | 83618214      |           | NM_001081012,                 | 4930473A06Rik | downs     | opp  | 446766      | C9orf93        |
| ivR281 | SINRV.PGK n | .a.      | 4    | 107040197     |           | NM_028355.3                   | Tmem48        | ups       | same | -191        | TMEM48         |
| ivR275 | SINRV.PGK n | .a.      | 4    | 109079392     |           | NM_153392.1                   | 4922503N01Rik | ups       | opp  | -335        | C1orf34        |
| ivR110 | SINRV.PGK n | .a.      | 4    | 132964535     |           | NM_016981.2                   | Slc9a1        | intra     | opp  | 38849       | SLC9A1         |

| Seq ID | Vector      | Mouse ID | Chr. | Chr. Position | Identical | Transcript ID                                   | Symbol        | Int. type | ORI  | Dist to tss | Human Ortholog |
|--------|-------------|----------|------|---------------|-----------|-------------------------------------------------|---------------|-----------|------|-------------|----------------|
| ivR161 | SINRV.PGK n | .a.      | 4    | 135585935     |           | NM_013736.4                                     | Tceb3         | ups       | same | -8371       | TCEB3          |
| ivR224 | SINRV.PGK n | .a.      | 5    | 76214994      |           | NM_010612.2                                     | Kdr           | downs     | same | 159459      | KDR            |
| ivR327 | SINRV.PGK n | .a.      | 5    | 77564426      |           | NM_175606.2                                     | Hod           | ups       | same | -20278      | HOP            |
| ivR237 | SINRV.PGK n | .a.      | 5    | 121093218     |           | NM_013832.3                                     | Rasal1        | ups       | same | -5612       | RASAL1         |
| ivR78  | SINRV.PGK n | .a.      | 5    | 126003610     |           | NM_030210.1                                     | Aacs          | downs     | opp  | 47368       | AACS           |
| ivR108 | SINRV.PGK n | .a.      | 5    | 136942203     |           | NM_009986.3<br>NM_198602.2                      | Cutl1         | intra     | opp  | 101098      | CUTL1          |
| ivR290 | SINRV.PGK n | .a.      | 5    | 148351081     |           | NM_028291.3                                     | Pan3          | intra     | opp  | 108617      | PAN3           |
| ivR179 | SINRV.PGK n | .a.      | 6    | 72462181      |           | XM_355785, XM_911211,                           | 4933424C13Rik | downs     | opp  | 8440        | SH2D6          |
| ivR271 | SINRV.PGK n | .a.      | 6    | 122694044     |           | NM_011401.3                                     | Slc2a3        | ups       | same | -1507       | SLC2A14        |
| ivR289 | SINRV.PGK n | .a.      | 6    | 123200381     |           | NM_020001                                       | Clec4n        | downs     | same | 20490       | CLEC4C         |
| ivR298 | SINRV.PGK n | .a.      | 6    | 127100599     |           | NM_009829.3                                     | Ccnd2         | intra     | opp  | 467         | CCND2          |
| ivR132 | SINRV.PGK   | n.a.     | 6    | 129165351     |           | NM_053109.2                                     | Clec2d        | downs     | opp  | 34712       |                |
| ivR33  | SINRV.PGK n | .a.      | 6    | 140646672     |           | NM_001005605.1<br>NM_009637.3<br>NM_178803.2    | Aebp2         | downs     | opp  | 74463       | AEBP2          |
| ivR153 | SINRV.PGK n | .a.      | 7    | 4690746       |           | NM_146177.1                                     | Suv420h2      | ups       | same | -982        | SUV420H2       |
| ivR287 | SINRV.PGK n | .a.      | 7    | 20190305      |           | NM_016680,                                      | Sfrs16        | ups       | opp  | -488        | SFRS16         |
| ivR228 | SINRV.PGK n | .a.      | 7    | 26470994      |           | NM_172148,                                      | B9d2          | intra     | opp  | 4818        | B9D2           |
| ivR96  | SINRV.PGK n | .a.      | 7    | 52345908      |           | NM_026555.1                                     | Rcn3          | intra     | opp  | 1675        | RCN3           |
| ivR282 | SINRV.PGK n | .a.      | 7    | 87721138      |           | NM_173863.2                                     | Crtc3         | downs     | same | 112625      | CRTC3          |
| ivR263 | SINRV.PGK n | .a.      | 7    | 87792421      |           | NM_173863.2                                     | Crtc3         | intra     | opp  | 41342       | CRTC3          |
| ivR69  | SINRV.PGK n | .a.      | 7    | 104356148     |           | NM_010248.1                                     | Gab2          | intra     | same | 125888      | GAB2           |
| ivR19  | SINRV.PGK n | .a.      | 7    | 106459560     |           | NM_001043355.2<br>NM_001048167.1<br>NM_010837.3 | Mtap6         | intra     | same | 42705       | MAP6           |
| ivR4   | SINRV.PGK n | .a.      | 7    | 124548714     |           | NM_175645.3                                     | Xylt1         | intra     | opp  | 24222       | XYLT1          |

| Seq ID | Vector      | Mouse ID | Chr. | Chr. Position | Identical | Transcript ID                    | Symbol        | Int. type | ORI  | Dist to tss | Human Ortholog |
|--------|-------------|----------|------|---------------|-----------|----------------------------------|---------------|-----------|------|-------------|----------------|
| ivR96  | SINRV.PGK n | .a.      | 7    | 124576672     |           | NM_175645.3                      | Xylt1         | intra     | opp  | 52180       | XYLT1          |
| ivR274 | SINRV.PGK   | n.a.     | 7    | 149538269     |           | NM_177265.4                      | 6330512M04Rik | intra     | same | 19895       |                |
| ivR91  | SINRV.PGK n | .a.      | 8    | 26736508      |           | NM_001001735.1<br>NM_001081269.1 | Whsc1 l1      | intra     | opp  | 23731       | WHSC1L1        |
| ivR173 | SINRV.PGK n | .a.      | 8    | 89594486      |           | NM_026533,                       | Rps13         | downs     | opp  | 33883162    | RPS13          |
| ivR172 | SINRV.PGK n | .a.      | 8    | 112132958     |           | NM_020046.3                      | Dhodh         | ups       | opp  | -385        | DHODH          |
| ivR247 | SINRV.PGK   | n.a.     | 8    | 124637542     |           | NM_016812.3                      | Banp I        | downs     | same | 163109      | BANP           |
| ivR301 | SINRV.PGK n | .a.      | 9    | 54430875      |           | NM_029573.2                      | Idh3a         | ups       | opp  | -3442       | IDH3A          |
| ivR288 | SINRV.PGK n | .a.      | 9    | 75274903      |           | NM_001039522                     | Leo1          | ups       | opp  | -14428      | LEO1           |
| ivR87  | SINRV.PGK   | n.a.     | 9    | 114687929     |           | NM_133978,                       | Cmtm7         | intra     | opp  | 3018        |                |
| ivR45  | SINRV.PGK n | .a.      | 9    | 123858053     |           | NM_009912.4                      | Ccr1          | downs     | same | 25472       | CCR1           |
| ivR86  | SINRV.PGK n | .a.      | 10   | 18611639      |           | NM_022032.4                      | Perp          | downs     | same | 46763       | PERP           |
| ivR129 | SINRV.PGK n | .a.      | 10   | 67711896      |           | NM_023598,                       | arid5b        | intra     | same | 29578       | ARID5B         |
| ivR2   | SINRV.PGK n | .a.      | 10   | 80598159      |           | NM_010731.3                      | Zbtb7a        | ups       | opp  | -856        | ZBTB7A         |
| ivR163 | SINRV.PGK n | .a.      | 10   | 110557248     |           | NM_001003717.1<br>NM_175489.3    | Osbpl8        | ups       | same | -44609      | OSBPL8         |
| ivR21  | SINRV.PGK   | n.a.     | 11   | 11446942      |           |                                  | 4930512M02Rik | downs     | opp  | 80899       |                |
| ivR59  | SINRV.PGK n | .a.      | 11   | 22891519      |           | NM_009837.1                      | Cct4          | intra     | opp  | 927         | CCT4           |
| ivR302 | SINRV.PGK n | .a.      | 11   | 49014517      |           | NM_001024846,<br>NM_009562, Zf   | p62           | ups       | opp  | -2484       | ZFP62          |
| ivR11  | SINRV.PGK n | .a.      | 11   | 53469058      |           | NM_009012.2                      | Rad50         | intra     | same | 51763       | RAD50          |
| ivR119 | SINRV.PGK n | .a.      | 11   | 65619651      |           | NM_026107.2                      | Zfp535        | ups       | same | -1094       | ZNF18          |
| ivR133 | SINRV.PGK n | .a.      | 11   | 74539018      |           | NM_013625,                       | Pafah1b1      | ups       | same | -846        | PAFAH1B1       |
| ivR297 | SINRV.PGK n | .a.      | 11   | 80598389      |           | NM_177390.3                      | Myo1d         | ups       | opp  | -4862       | MYO1D          |
| ivR258 | SINRV.PGK   | n.a.     | 11   | 87565786      |           |                                  | mmu-mir-142   | ups       | same | -4580       |                |
| ivR131 | SINRV.PGK   | n.a.     | 11   | 87567380      |           |                                  | mmu-mir-142   | ups       | opp  | -2986       |                |
| ivR172 | SINRV.PGK n | .a.      | 11   | 99004882      |           | NM_007719.2                      | Ccr7          | downs     | same | 11509       | CCR7           |

| Seq ID | Vector      | Mouse ID | Chr. | Chr. Position | Identical | Transcript ID                     | Symbol        | Int. type | ORI  | Dist to tss | Human Ortholog |
|--------|-------------|----------|------|---------------|-----------|-----------------------------------|---------------|-----------|------|-------------|----------------|
| ivR243 | SINRV.PGK n | .a.      | 11   | 106639774     |           | NM_015810,                        | Polg2         | intra     | opp  | 982         | POLG2          |
| ivR270 | SINRV.PGK n | .a.      | 11   | 115574978     |           | NM_008163.3                       | Grb2          | ups       | same | -5067       | GRB2           |
| ivR309 | SINRV.PGK n | .a.      | 11   | 117211272     |           | NM_017380,                        | Sept9         | intra     | opp  | 18244       | SEPT9          |
| ivR115 | SINRV.PGK n | .a.      | 11   | 120410346     |           | NM_026814.3                       | Dysfip1       | downs     | same | 2100        | DYSFIP1        |
| ivR223 | SINRV.PGK   | n.a.     | 11   | 120410346     |           | NM_001033231.2                    | BC003940      | intra     | same | 695         |                |
| ivR213 | SINRV.PGK n | .a.      | 12   | 85546299      |           | XM_001473233,<br>XM_001477247, C1 | 30039016Rik   | intra     | same | 13532       | C14orf43       |
| ivR299 | SINRV.PGK n | .a.      | 12   | 88670924      |           | NM_011479.3                       | Sptlc2        | intra     | same | 58256       | SPTLC2         |
| ivR203 | SINRV.PGK n | .a.      | 12   | 111936626     |           | NM_010480.5                       | Hsp90aa1      | ups       | same | -2021       | Q58FG1         |
| ivR18  | SINRV.PGK n | .a.      | 12   | 117521903     |           | NM_028731.5                       | D12Erd551e    | intra     | opp  | 2209        | FAM62B         |
| ivR136 | SINRV.PGK n | .a.      | 13   | 4255917       |           | NM_001013785.2                    | Akr1c19       | downs     | opp  | 22932       | AKR1C1         |
| ivR195 | SINRV.PGK   | n.a.     | 13   | 17004644      |           | NM_138654.2                       | 5033411D12Rik | intra     | same | 781929      | Q4KMW4         |
| ivR145 | SINRV.PGK   | n.a.     | 13   | 34877638      |           |                                   | AK007247      | downs     | same | 50919       | FAM50B         |
| ivR293 | SINRV.PGK n | .a.      | 13   | 49284511      |           | NM_013610.2                       | Ninj1         | intra     | opp  | 1596        | NINJ1          |
| ivR183 | SINRV.PGK n | .a.      | 13   | 96457105      |           | NM_027711.1                       | Iqgap2        | intra     | opp  | 204772      | IQGAP2         |
| ivR135 | SINRV.PGK n | .a.      | 13   | 109240926     |           | NM_178683.4                       | Depdc1b       | downs     | opp  | 134396      | DEPDC1B        |
| ivR261 | SINRV.PGK n | .a.      | 13   | 110611561     |           | NM_011056,                        | Pde4d         | intra     | opp  | 1167191     | PDE4D          |
| ivR32  | SINRV.PGK n | .a.      | 14   | 15505837      |           | NM_001033270.2                    | Slc4a7        | ups       | opp  | -29701      | SLC4A7         |
| ivR250 | SINRV.PGK n | .a.      | 14   | 22419139      |           | NM_017479,                        | Myst4         | intra     | opp  | 100064      | MYST4          |
| ivR280 | SINRV.PGK n | .a.      | 14   | 26283507      |           | NM_183208.2                       | Zmiz1         | intra     | same | 4730        | ZMIZ1          |
| ivR273 | SINRV.PGK n | .a.      | 14   | 26283507      |           | NM_183208.2                       | Zmiz1         | intra     | same | 4730        | ZMIZ1          |
| ivR42  | SINRV.PGK n | .a.      | 14   | 37689255      |           | NM_027045.1<br>NM_028407.3        | Gcap14        | intra     | opp  | 92695       | KIAA1128       |
| ivR128 | SINRV.PGK n | .a.      | 14   | 122790973     |           | NM_029556.2                       | Clybl         | intra     | same | 210031      | CLYBL          |
| ivR196 | SINRV.PGK n | .a.      | 15   | 3946506       |           | NM_145930.2                       | AW549877      | ups       | opp  | -754        | NP_787117.3    |
| ivR23  | SINRV.PGK   | n.a.     | 15   | 73697174      |           | NM_001033365.2                    | Gm628         | ups       | opp  | -27073      |                |

| Seq ID | Vector      | Mouse ID | Chr. | Chr. Position | Identical | Transcript ID                    | Symbol      | Int. type | ORI  | Dist to tss | Human Ortholog |
|--------|-------------|----------|------|---------------|-----------|----------------------------------|-------------|-----------|------|-------------|----------------|
| ivR301 | SINRV.PGK n | .a.      | 15   | 80430325      |           | NM_010815,                       | Grap2       | ups       | same | -23587      | GRAP2          |
| ivR306 | SINRV.PGK n | .a.      | 15   | 96172087      |           | NM_175251.2                      | Arid2       | ups       | same | -15118      | ARID2          |
| ivR142 | SINRV.PGK   | n.a.     | 15   | 96485041      |           |                                  | Slc38a1     | ups       | opp  | -11697      | SLC38A1        |
| ivR300 | SINRV.PGK n | .a.      | 16   | 17253220      |           | NM_178922.3                      | Hic2        | intra     | same | 19541       | HIC2           |
| ivR178 | SINRV.PGK n | .a.      | 16   | 17761896      |           | NM_145479.4                      | Klhl22      | intra     | opp  | 2183        | KLHL22         |
| ivR308 | SINRV.PGK n | .a.      | 16   | 33748838      |           | NM_172934.4<br>NM_175256.5       | Heg1        | downs     | opp  | 64287       |                |
| ivR80  | SINRV.PGK n | .a.      | 16   | 33752526      |           | NM_172934.4<br>NM_175256.5       | Heg1        | downs     | same | 67975       |                |
| ivR283 | SINRV.PGK n | .a.      | 16   | 49770118      |           | NM_028680.3                      | Ift57       | downs     | opp  | 70712       | IFT57          |
| ivR9   | SINRV.PGK   | n.a.     | 16   | 93193516      |           |                                  | mmu-mir-802 | ups       | same | -176449     |                |
| ivR312 | SINRV.PGK n | .a.      | 17   | 3492772       |           | NM_011878.1                      | Tiam2       | intra     | same | 95566       | TIAM2          |
| ivR305 | SINRV.PGK n | .a.      | 17   | 5238429       |           | NM_001085355.1                   | Arid1b      | intra     | opp  | 243356      | ARID1B         |
| ivR142 | SINRV.PGK n | .a.      | 17   | 17764219      |           | NM_172827.3                      | Lnpep       | ups       | same | -2766       | LNPEP          |
| ivR165 | SINRV.PGK n | .a.      | 17   | 27926549      |           | NM_001033279.2<br>NM_001044719.1 | D17Wsu92e   | intra     | opp  | 30938       | C6orf106       |
| ivR1   | SINRV.PGK n | .a.      | 17   | 34257753      |           | NM_001025387.2<br>NM_010238.3    | Brd2        | ups       | same | -425        | BRD2           |
| ivR178 | SINRV.PGK n | .a.      | 17   | 35162314      |           | NM_138582.1                      | D17H6S56E-3 | intra     | same | 8791        | C6orf27        |
| ivR304 | SINRV.PGK n | .a.      | 17   | 52303446      |           | NM_009122.1                      | Satb1       | ups       | opp  | -331488     | SATB1          |
| ivR285 | SINRV.PGK n | .a.      | 17   | 64205265      |           | NM_001037997.1<br>NM_008000.1    | Fert2       | ups       | opp  | -40107      | FER            |
| ivR187 | SINRV.PGK n | .a.      | 17   | 79778624      |           | NM_026514.2                      | Cdc42ep3    | ups       | same | -24193      | CDC42EP3       |
| ivR159 | SINRV.PGK n | .a.      | 17   | 84358269      |           | NM_025325,                       | Haoa        | ups       | opp  | -112139     | HAAO           |
| ivR260 | SINRV.PGK n | .a.      | 17   | 84547795      |           | NM_001001806.2                   | Zfp36l2     | downs     | same | 39492       | ZFP36L2        |
| ivR2   | SINRV.PGK n | .a.      | 17   | 85245494      |           | NM_028233.2                      | Lrpprc      | ups       | opp  | -55368      | LRPPRC         |
| ivR12  | SINRV.PGK n | .a.      | 17   | 86584585      |           | NM_011104.1                      | Prkce       | intra     | same | 16656       | PRKCE          |
| ivR303 | SINRV.PGK n | .a.      | 18   | 38159973      |           | NM_139206.2                      | Centd3      | ups       | same | -2745       | CENTD3         |

| Seq ID | Vector      | Mouse ID | Chr. | Chr. Position | Identical | Transcript ID                 | Symbol        | Int. type | ORI  | Dist to tss | Human Ortholog |
|--------|-------------|----------|------|---------------|-----------|-------------------------------|---------------|-----------|------|-------------|----------------|
| ivR40  | SINRV.PGK n | .a.      | 18   | 53310654      |           | NM_026386.1                   | Snx2          | ups       | same | -25364      | SNX2           |
| ivR278 | SINRV.PGK n | .a.      | 18   | 84398933      |           | XM_976217, XM_991500,         | Zfp407        | intra     | opp  | 329382      | ZNF407         |
| ivR130 | SINRV.PGK n | .a.      | 19   | 5729833       |           | NM_023166, NM_181452,         | Mtvr2         | ups       | opp  | -200        | FAM89B         |
| ivR28  | SINRV.PGK n | .a.      | 19   | 8850120       |           | NM_146092,                    | Taf6l         | intra     | same | 10633       | TAF6L          |
| ivR26  | SINRV.PGK n | .a.      | 19   | 10631440      |           | NM_026798.1                   | 2810441K11Rik | ups       | opp  | -712        | NP_057583.2    |
| ivR313 | SINRV.PGK n | .a.      | 19   | 46529287      |           | NM_001025391.1<br>NM_015752.2 | Sufu          | intra     | opp  | 57880       | SUFU           |
| ivR51  | SINRV.PGK n | .a.      | 19   | 47062594      |           | NM_029810.3                   | Nt5c2         | ups       | same | -25796      | NT5C2          |
| ivR42  | SINRV.PGK n | .a.      | X    | 131117678     |           | NM_013482.1                   | Btk           | intra     | same | 1           | BTK            |
| ivR169 | SINRV.PGK n | .a.      | X    | 156084656     |           | NM_021389.4                   | Sh3kbp1       | ups       | same | -61876      | SH3KBP1        |
| ivR297 | SINRV.PGK n | .a.      | X    | 158363355     |           | NM_001081052.1                | Nhs           | intra     | same | 234367      | NHS            |
| RAD02  | SINRV.PGK   | 114      | 4    | 145686197     |           | NM_001085522.2                | LOC433791     | down      | same | 62812       |                |
| RAC11  | SINRV.PGK 1 | 14       | X    | 6889639       |           | NM_016691.2                   | Clcn5         | up        | opp  | -123827     | CLCN5          |
| RCA06  | SINRV.PGK 1 | 13       | 17   | 84514402      |           | NM_001001806.2                | Zfp36l2       | down      | opp  | 72885       | ZFP36L2        |
| RAF06  | SINRV.PGK 1 | 12       | 3    | 14612200      |           | NM_001099674.1                | 1810022K09Rik | up        | opp  | -944        | C8orf59        |
| RAF09  | SINRV.PGK 1 | 12       | 8    | 23924275      |           | NM_001122820.1                | Ap3m2         | up        | opp  | -8149       | AP3M2          |
| RBE12  | SINRV.PGK   | 110      | 5    | 24745489      |           | NM_144908.3 G                 | alnt11 in     |           | same | 16779       | GALNT11        |
| RBF07  | SINRV.PGK 1 | 10       | 11   | 88829612      |           | NM_016706.2                   | Coil          | up        | same | -5636       | COIL           |
| RBA07  | SINRV.PGK 1 | 09       | 1    | 184054264     |           | NM_012058.3                   | srp9          | up        | same | -603        | SRP9           |
| RAH10  | SINRV.PGK 1 | 09       | 6    | 22432066      |           | NM_138587.4                   | D6Wsu176e     | up        | same | -125985     | FAM3C          |
| RAH06  | SINRV.PGK 1 | 09       | 8    | 114175914     |           | NM_001037665.2                | Zfp1          | in        | same | 8572        | ZFP1           |
| RBG02  | SINRV.PGK   | 108      | 5    | 123585364     |           | NM_175092.3                   | Rhof          | up        | opp  | -2726       | RHOF           |
| RBH09  | SINRV.PGK 1 | 08       | 8    | 122953983     |           | NM_198671.1                   | Gse1          | up        | same | -58782      | KIAA0182       |
| RBG10  | SINRV.PGK 1 | 08       | 12   | 53762737      |           | NM_198111.2                   | akap6         | up        | same | -37632      | AKAP6          |
| RBG11  | SINRV.PGK 1 | 08       | 13   | 94542670      |           | NM_009712.3                   | Arsb          | in        | opp  | 1037        | ARSB           |
| RBG08  | SINRV.PGK 1 | 08       | 17   | 34777246      |           | NM_019873.2                   | Fkbpl         | up        | same | -4581       | FKBPL          |

| Seq ID | Vector      | Mouse ID | Chr. | Chr. Position | Identical | Transcript ID                    | Symbol        | Int. type | ORI  | Dist to tss | Human Ortholog |
|--------|-------------|----------|------|---------------|-----------|----------------------------------|---------------|-----------|------|-------------|----------------|
| RAA01  | SINRV.PGK   | 105      | 10   | 117298507     |           | NM_024457.2                      | Rap1b         | up        | same | -15477      | RAP1B          |
| RAA06  | SINRV.PGK 1 | 05       | 11   | 103124521     |           | NM_016896.3                      | Map3k14       | in        | same | 4194        | MAP3K14        |
| RAE02  | SINRV.PGK 1 | 04       | 4    | 57050588      |           | NM_019427.2                      | Epb4.1l4b     | down      | same | 105440      | EPB41L4B       |
| RAE06  | SINRV.PGK   | 104      | 11   | 53163566      |           | NM_033565.1                      | Aff4          | up        | opp  | -768        | AFF4           |
| RAE08  | SINRV.PGK 1 | 04       | 15   | 103125764     |           | NM_019817.1                      | copz1         | in        | same | 22416       | COPZ1          |
| R15D07 | SINRV.PGK 1 | 02       | 7    | 4604522       |           | NM_172894.2                      | Saps1         | in        | opp  | 6030        | SAPS1          |
| R15A06 | SINRV.PGK 1 | 02       | 7    | 29567357      |           | NM_022432.4                      | Sirt2         | in        | same | 15587       | SIRT2          |
| R15A12 | SINRV.PGK 1 | 02       | 15   | 63491486      |           | NM_177912.3                      | A1987692 down |           | opp  | 185245      | MLZE           |
| R15A08 | SINRV.PGK 1 | 02       | 17   | 27958660      |           | NM_001033279.2<br>NM_001044719.1 | D17Wsu92e     | up        | same | -1173       | C6orf106       |
| R15D08 | SINRV.PGK 1 | 02       | 19   | 46530764      |           | NM_001025391.1<br>NM_015752.2    | Sufu          | in        | same | 59357       | SUFU           |
| RAB08  | SINRV.PGK 1 | 01       | 2    | 25390438      |           | NM_009422.2                      | Traf2         | in        | same | 11976       | TRAF2          |
| RAB03  | SINRV.PGK 1 | 01       | 17   | 84385935      |           | NM_025325.2                      | Haa0          | up        | opp  | -139805     | HAAO           |
| R15F09 | SINRV.PGK 1 | 00       | 3    | 65294058      |           | NM_178892.5                      | Tparp         | up        | opp  | -38310      | TIPARP         |
| R15D01 | SINRV.PGK 1 | 00       | 3    | 70029586      |           | NM_001018031.1                   | Gm414         | down      | same | 218052      | NP_001073909.1 |
| R15F03 | SINRV.PGK   | 100      | 11   | 58717912      |           | NM_011758.2                      | Zfp39         | up        | opp  | -185        |                |
| R15G04 | SINRV.PGK 1 | 00       | 16   | 32522832      |           | NM_199309.2                      | Zdhhc19       | down      | same | 26466       | ZDHHC19        |
| RCC12  | SINRV.PGK   | 99       | 1    | 52636434      |           | NM_133829.2                      | 2210010L05Rik | down      | same | 147728      | NP_060164.3    |
| RCD05  | SINRV.PGK 9 | 9        | 13   | 41581251      |           | NM_001111324.1                   | Nedd9         | in        | same | 1438        | NEDD9          |
| RBB07  | SINRV.PGK 9 | 8        | 2    | 154252374     |           | NM_009823.1                      | Cbfa2t2       | up        | same | -9845       | CBFA2T2        |
| RCE12  | SINRV.PGK 9 | 6        | 2    | 32389041      |           | NM_153560.4                      | C230093N12Rik | up        | opp  | -1837       | FAM102A        |
| RCF04  | SINRV.PGK 9 | 6        | 19   | 17394305      |           | NM_173442.2                      | Gcnt1         | down      | same | 36802       | GCNT1          |
| RCC04  | SINRV.PGK   | 93       | 3    | 96048238      |           | NM_013549.1                      | Hist2h2aa1    | in        | opp  | 1800        |                |
| RCB08  | SINRV.PGK 9 | 3        | 7    | 31001025      |           | NM_025548.3                      | Tbcb          | down      | opp  | 16023       | TBCB           |
| RCB11  | SINRV.PGK 9 | 3        | 10   | 76677988      |           | NM_030262.3                      | Pofut2        | up        | same | -44056      | POFUT2         |

| Seq ID | Vector       | Mouse ID | Chr. | Chr. Position | Identical | Transcript ID                                   | Symbol  | Int. type | ORI  | Dist to tss | Human Ortholog |
|--------|--------------|----------|------|---------------|-----------|-------------------------------------------------|---------|-----------|------|-------------|----------------|
| R15H08 | SINRV.PGK 9  | 2        | 15   | 76531370      |           | NM_027122.3                                     | Mfsd3   | up        | same | -601        | MFSD3          |
| R15E07 | SINRV.PGK 9  | 1        | 1    | 92955134      |           | NM_008515.3                                     | Lrrfip1 | in        | opp  | 5113        | LRRFIP1        |
| R15E12 | SINRV.PGK 9  | 1        | 10   | 7561098       |           | NM_172785.2                                     | Zc3h12d | in        | opp  | 8831        | ZC3H12D        |
| RBD10  | SINRV.PGK 9  | 0        | 3    | 87943617      |           | NM_133665.3                                     | mef2d   | up        | same | -2699       | MEF2D          |
| RBD02  | SINRV.PGK    | 90       | 7    | 16586555      |           | NM_001081418.1                                  | Gltscr1 | up        | opp  | -1711       | GLTSCR1        |
| RBE06  | SINRV.PGK 9  | 0        | 9    | 70687687      |           | NM_008280.2                                     | Lipc    | in        | opp  | 94928       | LIPC           |
| RBE01  | SINRV.PGK    | 90       | 11   | 87994013      |           | NM_198013.2                                     | Cuedc1  | in        | opp  | 81203       | CUEDC1         |
| RBD08  | SINRV.PGK    | 90       | 17   | 32249962      |           | NM_008716.2                                     | Notch3  | down      | same | 53835       | NOTCH3         |
| R16E02 | SINRV.PGK 8  | 8        | 5    | 53881718      |           | NM_001080927.1<br>NM_001080928.1<br>NM_009035.4 | Rbpsuh  | up        | same | -100094     | RBPJ           |
| RCE08  | SINRV.PGK 8  | 8        | 7    | 121210066     |           | NM_025846.2                                     | Rras2   | in        | same | 51229       | RRAS2          |
| RCE04  | SINRV.PGK    | 88       | 15   | 60669286      |           | NM_001081067.1                                  | A1bg    | down      | opp  | 83539       | A1BG           |
| RCH11  | SINRV.PGK    | 87       | 9    | 107470437     |           | NM_010489.2                                     | Hyal2   | up        | same | -1056       | HYAL2          |
| R16B09 | SINRV.PGK 3  | 0        | 4    | 131771664     |           | NM_145393.3                                     | Ythdf2  | up        | opp  | -3493       | YTHDF2         |
| R16A02 | SINRV.PGK 30 | 0        | 7    | 31784462      |           | NM_175240.3                                     | Tmem162 | down      | same | 22401       | TMEM162        |
| R16A08 | SINRV.PGK 3  | 0        | 13   | 55855992      |           | NM_028281.1                                     | Pcbd2   | in        | opp  | 27264       | PCBD2          |

**Supplementary Table 2.** Genomic position of LV.SF.LTR, SIN.LV.SF and SIN.RV.PGK integrations found *in vitro* and in tumors and nearest targeted gene. Sequences obtained from plasmid libraries of cloned LAM PCR products were analyzed for the presence of vector LTR sequences, linker cassette and internal or terminal restriction sites for Tsp509I or HpyCH4IV used in the LAM PCR procedure. Sequences containing the LV LTR end (either full-length or up to 3 nt before the end) and the linker cassette were considered genuine LAM PCR products of provirus/genome junctions or control bands. Sequences contained between LTR sequence and linker cassette were discarded if containing vector or plasmid sequences or if contained a restriction site for the same enzyme used in the LAM PCR in internal position. Linker and vector sequences were subsequently trimmed and the remaining sequence aligned to each other to generate a non redundant dataset of sequences (column Seq ID). Sequences of length >18 bp were mapped on the mouse genome (version Feb 2006) by BLAT analysis at <http://genome.ucsc.edu/cgi-bin/hgBlat>.

**Column Seq ID:** ID of integrations retrieved from lin- cells transduced *in vitro* (seq id with the prefix: iv) or tumor infiltrated mouse tissues.

**Vector:** vector used.

**Mouse ID:** mouse identifier number.

**Chr.:** chromosome number.

**Chr. Position:** LTR position on chromosome in nucleotides.

**Identical:** IDs of mice sharing identical integration sites are indicated. We excluded sample cross-contamination as the same results were obtained sequencing LAM-PCR products obtained from different tissues including those of secondary transplanted mice. Two pairs of LV.SF.LTR mice transplanted with the same bulk population shared a common set of integrations (5 in one pair of mice and 2 in the other pair). Similarly, two pairs of SIN.LV.SF mice also shared a common integration.

**Transcript ID:** Mouse RefSeq or ENSEMBL transcripts of genes targeted or near vector integrations are indicated. Genomic coordinates for the indicated transcripts were used for the calculation of distance distribution of the integration around the TSS and the entire gene length.

**Symbol:** gene symbol targeted or nearest an integration site.

**Int Type:** intra: intragenic vector integrations between the TSS and cDNA end; ups: upstream the TSS; downs: downstream the gene end.

**ORI:** orientation of LTR with respect to the direction of transcription of the targeted gene, opposite (opp) and the same are indicated.

**Dist. to TSS:** distance between TSS and LTR end were calculated based on the genomic coordinates of the targeted transcript and the vector integration site. Distance of integration upstream the TSS is negative whereas the integrations inside and downstream genes are positive.

**Human Ortholog:** gene symbol of the putative human ortholog genes of the mouse gene datasets were retrieved by searching the biomaRt human mouse homology databases (<http://www.ensembl.org/biomart/martview>).

**Supplementary Table 3a**

| DB    | CIS Type | LV.SF.LTR S             |                | IN.LV.SF                |                | SIN.RV.PGK               |                |
|-------|----------|-------------------------|----------------|-------------------------|----------------|--------------------------|----------------|
|       |          | <i>in vitro</i><br>n=70 | Tumors<br>n=93 | <i>in vitro</i><br>n=90 | Tumors<br>n=78 | <i>in vitro</i><br>n=135 | Tumors<br>n=54 |
| RTCGD | R CIS    | 6                       | 8              | 2 2                     |                | 20                       | 8              |
|       | SB CIS   | 5                       | 3              | 1 1                     |                | 1                        | 0              |
|       | All CIS  | 10                      | 11             | 3 3                     |                | 20                       | 8              |

**Supplementary Table 3b**

| Dataset S                                                  | ystem                     | Gene Class                                                                         | n      | p Value                | Fold |
|------------------------------------------------------------|---------------------------|------------------------------------------------------------------------------------|--------|------------------------|------|
| LV.SF.LTR<br><i>in vitro</i>                               | BP                        | phosphate metabolic process                                                        | 11     | 1.70E-03               | 4.0  |
|                                                            |                           | phosphorus metabolic process                                                       | 11     | 2.30E-02               | 6.4  |
|                                                            |                           | phosphorylation 10                                                                 |        | 1.40E-03               | 3.3  |
|                                                            |                           | protein amino acid phosphorylation                                                 | 9      | 2.40E-03               | 3.7  |
|                                                            | MF                        | phosphotransferase activity, alcohol group as acceptor                             | 8      | 1.40E-03               | 3.3  |
|                                                            |                           | protein kinase activity                                                            | 7      | 1.30E-02               | 3.1  |
| LV.SF.LTR<br>Tumors                                        | BP                        | B cell differentiation                                                             | 3      | 2.90E-02               | 4.2  |
|                                                            |                           | cell cycle phase                                                                   | 5      | 3.30E-02               | 3.3  |
|                                                            |                           | mitotic cell cycle                                                                 | 5      | 1.10E-03               | 4.2  |
|                                                            |                           | regulation of apoptosis                                                            | 6      | 5.00E-02               | 3.0  |
| SIN.LV.SF<br><i>in vitro</i>                               | BP                        | chromatin modification                                                             | 4      | 2.40E-02               | 4.5  |
| SIN.LV.SF<br>Tumors                                        | BP                        | dephosphorylation 4                                                                |        | 2.40E-02               | 4.5  |
|                                                            |                           | intracellular protein transport 6                                                  |        | 3.60E-02               | 3.2  |
|                                                            |                           | protein amino acid dephosphorylation                                               | 4      | 1.50E-03               | 3.6  |
|                                                            | MF                        | helicase activity                                                                  | 4      | 4.50E-02               | 4.9  |
|                                                            |                           | hydrolase activity, acting on acid anhydrides                                      | 9      | 3.90E-02               | 5.3  |
|                                                            |                           | hydrolase activity, acting on acid anhydrides, in phosphorus-containing anhydrides | 9 1.50 | E-02                   | 7.7  |
|                                                            |                           | nucleoside-triphosphatase activity                                                 | 9      | 1.60E-03               | 4.0  |
|                                                            |                           | phosphoprotein phosphatase activity                                                | 4      | 1.80E-02               | 7.1  |
|                                                            |                           | protein transporter activity                                                       | 6      | 1.50E-02               | 15.8 |
|                                                            |                           | protein tyrosine phosphatase activity                                              | 4      | 2.60E-02               | 4.4  |
|                                                            |                           | pyrophosphatase activity                                                           | 9      | 4.40E-02               | 3.7  |
|                                                            |                           | SIN.RV.PGK<br><i>in vitro</i>                                                      | BP     | chromatin modification | 5    |
| DNA packaging                                              | 6                         |                                                                                    |        | 2.00E-02               | 4.7  |
| establishment and/or maintenance of chromatin architecture | 6 2.60                    |                                                                                    |        | E-02                   | 3.4  |
| MF                                                         | GTPase activator activity |                                                                                    | 5      | 4.00E-02               | 3.0  |
|                                                            | phosphoinositide binding  |                                                                                    | 5      | 5.80E-03               | 10.8 |
| SIN.RV.PGK<br>Tumors                                       | BP                        | establishment of protein localization                                              | 6      | 3.50E-02               | 3.2  |
|                                                            |                           | intracellular protein transport 5                                                  |        | 2.00E-02               | 6.8  |
|                                                            |                           | macromolecule localization                                                         | 6      | 3.60E-04               | 9.7  |
|                                                            |                           | negative regulation of cellular metabolic process                                  | 4      | 1.50E-03               | 4.0  |
|                                                            |                           | protein localization                                                               | 6      | 2.10E-02               | 3.2  |

**Supplementary Table 3c**

| DB Gen        | e Class                                | LV.SF.LTR SIN    |                | .LV.SF           |                | SIN.RV.PGK        |                |
|---------------|----------------------------------------|------------------|----------------|------------------|----------------|-------------------|----------------|
|               |                                        | in vitro<br>n=70 | Tumors<br>n=93 | in vitro<br>n=90 | Tumors<br>n=78 | in vitro<br>n=135 | Tumors<br>n=54 |
| Gene Ontology | BP:protein amino acid phosphorylation  | 9                | 7              | 5                | 5              | 6                 | 1              |
|               | MF:protein kinase activity             | 7                | 5              | 5                | 6              | 7                 | 1              |
|               | BP:B cell differentiation              | 0                | 3              | 1                | 0              | 0                 | 1              |
|               | BP:cell cycle phase                    | 1                | 5              | 2                | 3              | 3                 | 2              |
|               | BP:mitotic cell cycle                  | 2                | 5              | 2                | 3              | 2                 | 2              |
|               | BP:regulation of apoptosis             | 2                | 7              | 1                | 1              | 4                 | 1              |
|               | BP:chromatin modification              | 0                | 4              | 4                | 3              | 5                 | 1              |
|               | BP:dephosphorylation 1                 |                  | 2              | 1                | 4              | 1                 | 0              |
|               | BP:intracellular protein transport     | 3                | 6              | 3                | 6              | 4                 | 5              |
|               | MF:helicase activity                   | 1                | 2              | 3                | 4              | 0                 | 0              |
|               | MF:phosphoprotein phosphatase activity | 1                | 2              | 2                | 4              | 1                 | 0              |
|               | MF:protein transporter activity        | 1                | 2              | 1                | 6              | 1                 | 2              |
|               | MF:pyrophosphatase activity            | 1                | 5              | 6                | 9              | 0                 | 1              |
|               | MF:GTPase activator activity           | 0                | 2              | 1                | 0              | 5                 | 0              |
|               | MF:phosphoinositide binding            | 0                | 1              | 0                | 1              | 5                 | 1              |

**Supplementary Table 3:** RTCGD CIS and GO DAVID-EASE overrepresentation analysis.

**a)** Number of retroviral (R) and Sleeping Beauty transposon (SB) and total (All) RTCGD CIS genes targeted in *in vitro* and in tumors by each vector used, as indicated. (n) indicates the total number of integrations in *in vitro* and in tumors datasets. Overall, we compared 520 unique integration sites obtained from 3 different vectors. Numbers significantly higher than the expected frequency ( $p < 0.05$ ;  $\chi^2$ ) are highlighted and bold (all significant p values were  $< 0.001$ ). The expected random frequency of each CIS gene class in the mouse genome was: for retroviral CIS 492/25613 mouse genes, (1.9%); for SB CIS 53/25613 (0.2%); for all CIS 535 CIS/25613 (2%).

**b)** G O DAV ID-EASE o verrepresentation an alysis of gene cl asses contained in the B iological Pro cess (B P) a nd Molecular Function (MF) systems (System) for the LV.SF.LTR, SIN.LV.SF and SIN.RV.PGK in *in vitro* and in tumors datasets. Gene Class: overrepresented gene class; n: number of matching genes in the dataset; p Value: Significance; Fold: fold increase with respect to the expected random frequency.

**c)** Number of occurrences in all datasets for each GO gene class overrepresented in at least one dataset.

Supplementary Table 4

| Vector        | primary DNA number | Source | Gene Symbol   | Entrez ID | RV cis | SB cis | All cis | BP: intracellular protein transport | BP: chromatin modification | BP: regulation of cell cycle | BP: cell cycle process | BP: protein amino acid phosphorylation | BP: cell cycle | BP: regulation of programmed cell death | BP: regulation of apoptosis | BP: immune system development | BP: hemopoietic or lymphoid organ dev. | BP: negative regulation of transcri | BP: hemopoiesis | BP: regulation of kinase activity | BP: B cell differentiation | BP: mitotic cell cycle | BP: cell cycle phase | BP: dephosphorylation | MF: helicase activity | MF: protein kinase activity | MF: protein serine-threonine kinase | MF: protein transporter activity | MF: transcription repressor activity | MF: phosphoinositide binding | MF: GTPase activator activity | MF: pyrophosphatase activity | MF: phosphoprotein phosphatase activity |
|---------------|--------------------|--------|---------------|-----------|--------|--------|---------|-------------------------------------|----------------------------|------------------------------|------------------------|----------------------------------------|----------------|-----------------------------------------|-----------------------------|-------------------------------|----------------------------------------|-------------------------------------|-----------------|-----------------------------------|----------------------------|------------------------|----------------------|-----------------------|-----------------------|-----------------------------|-------------------------------------|----------------------------------|--------------------------------------|------------------------------|-------------------------------|------------------------------|-----------------------------------------|
| IV- LV.SF.LTR |                    | IV     | 2010106G01Rik | 66552     |        |        |         |                                     |                            |                              |                        |                                        |                |                                         |                             |                               |                                        |                                     |                 |                                   |                            |                        |                      |                       |                       |                             |                                     |                                  |                                      |                              |                               |                              |                                         |
| IV- LV.SF.LTR |                    | IV     | 2410014A08Rik | 109154    |        |        |         | x                                   |                            |                              |                        |                                        |                |                                         |                             |                               |                                        |                                     |                 |                                   |                            |                        |                      |                       |                       |                             |                                     |                                  |                                      |                              |                               |                              |                                         |
| IV- LV.SF.LTR |                    | IV     | 3110056O03Rik | 73218     | 2      |        | x       |                                     |                            |                              |                        |                                        |                |                                         |                             |                               |                                        |                                     |                 |                                   |                            |                        |                      |                       |                       |                             |                                     |                                  |                                      |                              |                               |                              |                                         |
| IV- LV.SF.LTR |                    | IV     | Acvr2a        | 11480     |        |        |         |                                     |                            |                              | x                      |                                        |                |                                         |                             |                               |                                        |                                     |                 |                                   |                            |                        |                      |                       |                       | x                           | x                                   |                                  |                                      |                              |                               |                              |                                         |
| IV- LV.SF.LTR |                    | IV     | Agk           | 69923     |        |        |         |                                     |                            |                              |                        |                                        |                |                                         |                             |                               |                                        |                                     |                 | x                                 |                            |                        |                      |                       |                       |                             |                                     |                                  |                                      |                              |                               |                              |                                         |
| IV- LV.SF.LTR |                    | IV     | Arrdc4        | 66412     |        |        |         |                                     |                            |                              |                        |                                        |                |                                         |                             |                               |                                        |                                     |                 |                                   |                            |                        |                      |                       |                       |                             |                                     |                                  |                                      |                              |                               |                              |                                         |
| IV- LV.SF.LTR |                    | IV     | Atp2b1        | 67972     |        |        |         |                                     |                            |                              |                        |                                        |                |                                         |                             |                               |                                        |                                     |                 |                                   |                            |                        |                      |                       |                       |                             |                                     |                                  |                                      |                              | x                             |                              |                                         |
| IV- LV.SF.LTR |                    | IV     | AU020772      | 277939    |        |        |         |                                     |                            |                              |                        |                                        |                |                                         |                             |                               |                                        |                                     |                 |                                   |                            |                        |                      |                       |                       |                             |                                     |                                  |                                      |                              |                               |                              |                                         |
| IV- LV.SF.LTR |                    | IV     | AW112010      | 107350    |        |        |         |                                     |                            |                              |                        |                                        |                |                                         |                             |                               |                                        |                                     |                 |                                   |                            |                        |                      |                       |                       |                             |                                     |                                  |                                      |                              |                               |                              |                                         |
| IV- LV.SF.LTR |                    | IV     | Btbd9         | 224671    |        |        |         |                                     |                            |                              |                        |                                        |                |                                         |                             |                               |                                        |                                     |                 |                                   |                            |                        |                      |                       |                       |                             |                                     |                                  |                                      |                              |                               |                              |                                         |
| IV- LV.SF.LTR |                    | IV     | Cacnb2        | 12296     |        |        |         |                                     |                            |                              |                        |                                        |                |                                         |                             |                               |                                        |                                     |                 |                                   |                            |                        |                      |                       |                       |                             |                                     |                                  |                                      |                              |                               |                              |                                         |
| IV- LV.SF.LTR |                    | IV     | Cacnb2        | 12296     |        |        |         |                                     |                            |                              |                        |                                        |                |                                         |                             |                               |                                        |                                     |                 |                                   |                            |                        |                      |                       |                       |                             |                                     |                                  |                                      |                              |                               |                              |                                         |
| IV- LV.SF.LTR |                    | IV     | Cadps2        | 320405    |        | 3      | x       |                                     |                            |                              |                        |                                        |                |                                         |                             |                               |                                        |                                     |                 |                                   |                            |                        |                      |                       |                       |                             |                                     |                                  |                                      |                              |                               |                              |                                         |
| IV- LV.SF.LTR |                    | IV     | Ccnt1         | 12455     |        |        |         |                                     | x                          | x                            | x                      | x                                      |                |                                         |                             |                               |                                        |                                     |                 | x                                 |                            |                        |                      |                       |                       |                             |                                     |                                  |                                      |                              |                               |                              |                                         |
| IV- LV.SF.LTR |                    | IV     | Col28a1       | 213945    |        | 2      | x       |                                     |                            |                              |                        |                                        |                |                                         |                             |                               |                                        |                                     |                 |                                   |                            |                        |                      |                       |                       |                             |                                     |                                  |                                      |                              |                               |                              |                                         |
| IV- LV.SF.LTR |                    | IV     | Copg2         | 54160     |        |        |         | x                                   |                            |                              |                        |                                        |                |                                         |                             |                               |                                        |                                     |                 |                                   |                            |                        |                      |                       |                       |                             |                                     |                                  | x                                    |                              |                               |                              |                                         |
| IV- LV.SF.LTR |                    | IV     | Creb5         | 231991    |        |        |         |                                     |                            |                              |                        |                                        |                |                                         |                             |                               |                                        |                                     |                 |                                   |                            |                        |                      |                       |                       |                             |                                     |                                  |                                      |                              |                               |                              |                                         |
| IV- LV.SF.LTR |                    | IV     | Cyfip1        | 20430     |        |        |         |                                     |                            |                              |                        |                                        |                |                                         |                             |                               |                                        |                                     |                 |                                   |                            |                        |                      |                       |                       |                             |                                     |                                  |                                      |                              |                               |                              |                                         |
| IV- LV.SF.LTR |                    | IV     | D16Ert472e    | 67102     |        |        |         |                                     |                            |                              |                        |                                        |                |                                         |                             |                               |                                        |                                     |                 |                                   |                            |                        |                      |                       |                       |                             |                                     |                                  |                                      |                              |                               |                              |                                         |
| IV- LV.SF.LTR |                    | IV     | D5Ert4585e    | 71782     |        |        |         |                                     |                            |                              |                        |                                        |                |                                         |                             |                               |                                        |                                     |                 |                                   |                            |                        |                      |                       |                       |                             |                                     |                                  |                                      |                              |                               |                              |                                         |
| IV- LV.SF.LTR |                    | IV     | D8Ert482e     | 244418    |        |        |         |                                     |                            |                              | x                      |                                        |                |                                         |                             |                               |                                        |                                     |                 |                                   |                            |                        |                      |                       |                       | x                           |                                     |                                  |                                      |                              |                               |                              |                                         |

| Vector        | primary DNA number | Source | Gene Symbol | Entrez ID | RV cis | SB cis | All cis | BP:intracellular protein transport | BP: chromatin modification | BP:regulation of cell cycle | BP: cell cycle process | BP: protein amino acid phosphorylation | BP:cell cycle | BP: regulation of programmed cell death | BP:regulation of apoptosis | BP:immune system development | BP:hempoietic or lymphoid organ dev. | BP:negative regulation of transcri | BP:hempopotesis | BP:regulation of kinase activity | BP:B cell differentiation | BP:mitotic cell cycle | BP:cell cycle phase | BP:dephosphorylation | MF:helicase activity | MF:protein kinase activity | MF:protein serine-threonine kinase | MF:protein transporter activity | MF:transcription repressor activity | MF:phosphoinositide binding | MF:GTPase activator activity | MF:pyrophosphatase activity | MF:phosphoprotein phosphatase activity |
|---------------|--------------------|--------|-------------|-----------|--------|--------|---------|------------------------------------|----------------------------|-----------------------------|------------------------|----------------------------------------|---------------|-----------------------------------------|----------------------------|------------------------------|--------------------------------------|------------------------------------|-----------------|----------------------------------|---------------------------|-----------------------|---------------------|----------------------|----------------------|----------------------------|------------------------------------|---------------------------------|-------------------------------------|-----------------------------|------------------------------|-----------------------------|----------------------------------------|
| IV- LV.SF.LTR |                    | IV     | Eif5        | 217869    |        |        |         |                                    |                            |                             |                        |                                        |               |                                         |                            |                              |                                      |                                    |                 |                                  |                           |                       |                     |                      |                      |                            |                                    |                                 |                                     |                             |                              |                             |                                        |
| IV- LV.SF.LTR |                    | IV     | Foxgl       | 15228     |        | 2      | x       |                                    |                            | x                           | x                      |                                        | x             |                                         |                            |                              |                                      |                                    |                 |                                  |                           | x                     |                     |                      |                      |                            |                                    |                                 |                                     |                             |                              |                             |                                        |
| IV- LV.SF.LTR |                    | IV     | Gab2        | 14389     |        |        |         |                                    |                            |                             |                        |                                        |               |                                         |                            |                              |                                      |                                    |                 |                                  |                           |                       |                     |                      |                      |                            |                                    |                                 |                                     |                             |                              |                             |                                        |
| IV- LV.SF.LTR |                    | IV     | Heatr1      | 217995    |        |        |         |                                    |                            |                             |                        |                                        |               |                                         |                            |                              |                                      |                                    |                 |                                  |                           |                       |                     |                      |                      |                            |                                    |                                 |                                     |                             |                              |                             |                                        |
| IV- LV.SF.LTR |                    | IV     | Ibtk        | 108837    |        |        |         |                                    |                            |                             |                        | x                                      |               |                                         |                            |                              |                                      |                                    |                 |                                  |                           |                       |                     |                      |                      |                            |                                    |                                 |                                     |                             |                              |                             |                                        |
| IV- LV.SF.LTR |                    | IV     | Ifitm1      | 68713     |        |        |         |                                    |                            |                             |                        |                                        |               |                                         |                            |                              |                                      |                                    |                 |                                  |                           |                       |                     |                      |                      |                            |                                    |                                 |                                     |                             |                              |                             |                                        |
| IV- LV.SF.LTR |                    | IV     | Ift57       | 73916     |        |        |         |                                    |                            |                             |                        |                                        |               | x                                       | x                          |                              |                                      |                                    |                 |                                  |                           |                       |                     |                      |                      |                            |                                    |                                 |                                     |                             |                              |                             |                                        |
| IV- LV.SF.LTR |                    | IV     | Kif13a      | 16553     |        |        |         |                                    |                            |                             |                        |                                        |               |                                         |                            |                              |                                      |                                    |                 |                                  |                           |                       |                     |                      |                      |                            |                                    |                                 |                                     |                             |                              |                             |                                        |
| IV- LV.SF.LTR |                    | IV     | Lphn3       | 319387    |        |        |         |                                    |                            |                             |                        |                                        |               |                                         |                            |                              |                                      |                                    |                 |                                  |                           |                       |                     |                      |                      |                            |                                    |                                 |                                     |                             |                              |                             |                                        |
| IV- LV.SF.LTR |                    | IV     | Lsm4        | 50783     |        |        |         |                                    |                            |                             |                        |                                        |               |                                         |                            |                              |                                      |                                    |                 |                                  |                           |                       |                     |                      |                      |                            |                                    |                                 |                                     |                             |                              |                             |                                        |
| IV- LV.SF.LTR |                    | IV     | Nrg3        | 18183     |        |        |         |                                    |                            |                             |                        |                                        |               |                                         |                            |                              |                                      |                                    |                 |                                  |                           |                       |                     |                      |                      |                            |                                    |                                 |                                     |                             |                              |                             |                                        |
| IV- LV.SF.LTR |                    | IV     | Nrxn3       | 18191     |        |        |         |                                    |                            |                             |                        |                                        |               |                                         |                            |                              |                                      |                                    |                 |                                  |                           |                       |                     |                      |                      |                            |                                    |                                 |                                     |                             |                              |                             |                                        |
| IV- LV.SF.LTR |                    | IV     | Nsmce2      | 68501     |        |        |         |                                    |                            |                             |                        |                                        |               |                                         |                            |                              |                                      |                                    |                 |                                  |                           |                       |                     |                      |                      |                            |                                    |                                 |                                     |                             |                              |                             |                                        |
| IV- LV.SF.LTR |                    | IV     | Nt5c3       | 107569    |        |        |         |                                    |                            |                             |                        |                                        |               |                                         |                            |                              |                                      |                                    |                 |                                  |                           |                       |                     |                      |                      |                            |                                    |                                 |                                     |                             |                              |                             |                                        |
| IV- LV.SF.LTR |                    | IV     | Olfir693    | 258445    |        |        |         |                                    |                            |                             |                        |                                        |               |                                         |                            |                              |                                      |                                    |                 |                                  |                           |                       |                     |                      |                      |                            |                                    |                                 |                                     |                             |                              |                             |                                        |
| IV- LV.SF.LTR |                    | IV     | Opcml       | 330908    |        |        |         |                                    |                            |                             |                        |                                        |               |                                         |                            |                              |                                      |                                    |                 |                                  |                           |                       |                     |                      |                      |                            |                                    |                                 |                                     |                             |                              |                             |                                        |
| IV- LV.SF.LTR |                    | IV     | Pam         | 18484     |        |        |         |                                    |                            |                             |                        |                                        |               |                                         |                            |                              |                                      |                                    |                 |                                  |                           |                       |                     |                      |                      |                            |                                    |                                 |                                     |                             |                              |                             |                                        |
| IV- LV.SF.LTR |                    | IV     | Pcdh15      | 11994     |        |        |         |                                    |                            |                             |                        |                                        |               |                                         |                            |                              |                                      |                                    |                 |                                  |                           |                       |                     |                      |                      |                            |                                    |                                 |                                     |                             |                              |                             |                                        |
| IV- LV.SF.LTR |                    | IV     | Pds5a       | 71521     |        |        |         |                                    |                            | x                           |                        |                                        | x             |                                         |                            |                              |                                      |                                    |                 |                                  |                           | x                     | x                   |                      |                      |                            |                                    |                                 |                                     |                             |                              |                             |                                        |
| IV- LV.SF.LTR |                    | IV     | Pf1k1       | 18647     |        |        |         |                                    |                            |                             |                        | x                                      |               |                                         |                            |                              |                                      |                                    |                 |                                  |                           |                       |                     |                      |                      | x                          | x                                  |                                 |                                     |                             |                              |                             |                                        |
| IV- LV.SF.LTR |                    | IV     | Pigp        | 56176     |        |        |         |                                    |                            |                             |                        |                                        |               |                                         |                            |                              |                                      |                                    |                 |                                  |                           |                       |                     |                      |                      |                            |                                    |                                 |                                     |                             |                              |                             |                                        |
| IV- LV.SF.LTR |                    | IV     | Plag1       | 56711     | 8      |        | x       |                                    |                            |                             |                        |                                        |               |                                         |                            |                              |                                      |                                    |                 |                                  |                           |                       |                     |                      |                      |                            |                                    |                                 |                                     |                             |                              |                             |                                        |

| Vector        | primary DNA number | Source | Gene Symbol | Entrez ID | RV cis | SB cis | All cis | BP: intracellular protein transport | BP: chromatin modification | BP: regulation of cell cycle | BP: cell cycle process | BP: protein amino acid phosphorylation | BP: cell cycle | BP: regulation of programmed cell death | BP: regulation of apoptosis | BP: immune system development | BP: hemopoietic or lymphoid organ dev. | BP: negative regulation of transcri | BP: hemopoiesis | BP: regulation of kinase activity | BP: B cell differentiation | BP: mitotic cell cycle | BP: cell cycle phase | BP: dephosphorylation | MF: helicase activity | MF: protein kinase activity | MF: protein serine-threonine kinase | MF: protein transporter activity | MF: transcription repressor activity | MF: phosphoinositide binding | MF: GTPase activator activity | MF: pyrophosphatase activity | MF: phosphoprotein phosphatase activity |
|---------------|--------------------|--------|-------------|-----------|--------|--------|---------|-------------------------------------|----------------------------|------------------------------|------------------------|----------------------------------------|----------------|-----------------------------------------|-----------------------------|-------------------------------|----------------------------------------|-------------------------------------|-----------------|-----------------------------------|----------------------------|------------------------|----------------------|-----------------------|-----------------------|-----------------------------|-------------------------------------|----------------------------------|--------------------------------------|------------------------------|-------------------------------|------------------------------|-----------------------------------------|
| IV- LV.SF.LTR |                    | IV     | Plod2       | 26432     |        |        |         |                                     |                            |                              |                        |                                        |                |                                         |                             |                               |                                        |                                     |                 |                                   |                            |                        |                      |                       |                       |                             |                                     |                                  |                                      |                              |                               |                              |                                         |
| IV- LV.SF.LTR |                    | IV     | Pon2        | 330260    |        |        |         |                                     |                            |                              |                        |                                        |                |                                         |                             |                               |                                        |                                     |                 |                                   |                            |                        |                      |                       |                       |                             |                                     |                                  |                                      |                              |                               |                              |                                         |
| IV- LV.SF.LTR |                    | IV     | Prdm5       | 70779     |        |        |         |                                     |                            |                              |                        |                                        |                |                                         |                             |                               |                                        |                                     |                 |                                   |                            |                        |                      |                       |                       |                             |                                     |                                  |                                      |                              |                               |                              |                                         |
| IV- LV.SF.LTR |                    | IV     | Prkcq       | 18761     |        |        |         |                                     |                            |                              |                        | x                                      |                |                                         |                             |                               |                                        |                                     |                 |                                   |                            |                        |                      |                       |                       | x                           | x                                   |                                  |                                      |                              |                               |                              |                                         |
| IV- LV.SF.LTR |                    | IV     | Rab36       | 76877     |        |        |         |                                     |                            |                              |                        |                                        |                |                                         |                             |                               |                                        |                                     |                 |                                   |                            |                        |                      |                       |                       |                             |                                     |                                  |                                      |                              |                               |                              |                                         |
| IV- LV.SF.LTR |                    | IV     | Rblcc1      | 12421     |        |        |         |                                     | x                          | x                            | x                      | x                                      | x              | x                                       | x                           |                               |                                        |                                     |                 |                                   |                            |                        |                      |                       |                       |                             |                                     |                                  |                                      |                              |                               |                              |                                         |
| IV- LV.SF.LTR |                    | IV     | Riok2       | 67045     |        |        |         |                                     |                            |                              |                        |                                        |                |                                         |                             |                               |                                        |                                     |                 |                                   |                            |                        |                      |                       |                       | x                           | x                                   |                                  |                                      |                              |                               |                              |                                         |
| IV- LV.SF.LTR |                    | IV     | Rnf12       | 19820     |        |        |         |                                     |                            |                              |                        |                                        |                |                                         |                             |                               |                                        |                                     |                 |                                   |                            |                        |                      |                       |                       |                             |                                     |                                  |                                      |                              |                               |                              |                                         |
| IV- LV.SF.LTR |                    | IV     | Runx2       | 12393     | 4      | 2      | x       |                                     |                            |                              |                        |                                        |                |                                         |                             |                               |                                        | x                                   |                 |                                   |                            |                        |                      |                       |                       |                             |                                     |                                  |                                      |                              |                               |                              |                                         |
| IV- LV.SF.LTR |                    | IV     | Scyl1bp1    | 98376     |        |        |         |                                     |                            |                              |                        |                                        |                |                                         |                             |                               |                                        |                                     |                 |                                   |                            |                        |                      |                       |                       |                             |                                     |                                  |                                      |                              |                               |                              |                                         |
| IV- LV.SF.LTR |                    | IV     | Sh3rf2      | 269016    |        |        |         |                                     |                            |                              |                        |                                        |                |                                         |                             |                               |                                        |                                     |                 |                                   |                            |                        |                      |                       |                       |                             |                                     |                                  |                                      |                              |                               |                              |                                         |
| IV- LV.SF.LTR |                    | IV     | Slc9a9      | 331004    | 3      |        | x       |                                     |                            |                              |                        |                                        |                |                                         |                             |                               |                                        |                                     |                 |                                   |                            |                        |                      |                       |                       |                             |                                     |                                  |                                      |                              |                               |                              |                                         |
| IV- LV.SF.LTR |                    | IV     | Slk         | 20874     |        |        |         |                                     |                            |                              |                        | x                                      |                |                                         |                             |                               |                                        |                                     |                 |                                   |                            |                        |                      |                       |                       |                             | x                                   | x                                |                                      |                              |                               |                              |                                         |
| IV- LV.SF.LTR |                    | IV     | Smarca2     | 67155     |        |        |         |                                     |                            |                              |                        |                                        |                |                                         |                             |                               |                                        |                                     |                 |                                   |                            |                        |                      |                       | x                     |                             |                                     |                                  |                                      |                              |                               |                              |                                         |
| IV- LV.SF.LTR |                    | IV     | Ssfa2       | 70599     |        |        |         |                                     |                            |                              |                        |                                        |                |                                         |                             |                               |                                        |                                     |                 |                                   |                            |                        |                      |                       |                       |                             |                                     |                                  |                                      |                              |                               |                              |                                         |
| IV- LV.SF.LTR |                    | IV     | Stk38l      | 232533    | 2      |        | x       | x                                   |                            |                              |                        | x                                      |                |                                         |                             |                               |                                        |                                     |                 |                                   |                            |                        |                      |                       |                       |                             | x                                   | x                                |                                      |                              |                               |                              |                                         |
| IV- LV.SF.LTR |                    | IV     | Thada       | 240174    | 2      |        | x       |                                     |                            |                              |                        |                                        |                |                                         |                             |                               |                                        |                                     |                 |                                   |                            |                        |                      |                       |                       |                             |                                     |                                  |                                      |                              |                               |                              |                                         |
| IV- LV.SF.LTR |                    | IV     | Tmem68      | 72098     |        |        |         |                                     |                            |                              |                        |                                        |                |                                         |                             |                               |                                        |                                     |                 |                                   |                            |                        |                      |                       |                       |                             |                                     |                                  |                                      |                              |                               |                              |                                         |
| IV- LV.SF.LTR |                    | IV     | Tnik        | 665113    |        |        |         |                                     |                            |                              |                        |                                        |                |                                         |                             |                               |                                        |                                     |                 |                                   |                            |                        |                      |                       |                       |                             |                                     |                                  |                                      |                              |                               |                              |                                         |
| IV- LV.SF.LTR |                    | IV     | Tns3        | 319939    |        |        |         |                                     |                            |                              |                        |                                        |                |                                         |                             |                               |                                        |                                     |                 |                                   |                            |                        |                      | x                     |                       |                             |                                     |                                  |                                      |                              |                               | x                            |                                         |
| IV- LV.SF.LTR |                    | IV     | Tpk1        | 29807     |        | 2      | x       |                                     |                            |                              |                        |                                        |                |                                         |                             |                               |                                        |                                     |                 |                                   |                            |                        |                      |                       |                       |                             |                                     |                                  |                                      |                              |                               |                              |                                         |
| IV- LV.SF.LTR |                    | IV     | Usp4        | 22258     |        |        |         |                                     |                            |                              |                        |                                        |                |                                         |                             |                               |                                        |                                     |                 |                                   |                            |                        |                      |                       |                       |                             |                                     |                                  |                                      |                              |                               |                              |                                         |

| Vector         | primary DNA number | Source | Gene Symbol   | Entrez ID | RV cis | SB cis | All cis | BP: intracellular protein transport | BP: chromatin modification | BP: regulation of cell cycle | BP: cell cycle process | BP: protein amino acid phosphorylation | BP: cell cycle | BP: regulation of programmed cell death | BP: regulation of apoptosis | BP: immune system development | BP: hemopoietic or lymphoid organ dev. | BP: negative regulation of transcri | BP: hemopoiesis | BP: regulation of kinase activity | BP: B cell differentiation | BP: mitotic cell cycle | BP: cell cycle phase | BP: dephosphorylation | MF: helicase activity | MF: protein kinase activity | MF: protein serine-threonine kinase | MF: protein transporter activity | MF: transcription repressor activity | MF: phosphoinositide binding | MF: GTPase activator activity | MF: pyrophosphatase activity | MF: phosphoprotein phosphatase activity |
|----------------|--------------------|--------|---------------|-----------|--------|--------|---------|-------------------------------------|----------------------------|------------------------------|------------------------|----------------------------------------|----------------|-----------------------------------------|-----------------------------|-------------------------------|----------------------------------------|-------------------------------------|-----------------|-----------------------------------|----------------------------|------------------------|----------------------|-----------------------|-----------------------|-----------------------------|-------------------------------------|----------------------------------|--------------------------------------|------------------------------|-------------------------------|------------------------------|-----------------------------------------|
| IV- LV.SF.LTR  |                    | IV     | Usp47         | 74996     |        |        |         |                                     |                            |                              |                        |                                        |                |                                         |                             |                               |                                        |                                     |                 |                                   |                            |                        |                      |                       |                       |                             |                                     |                                  |                                      |                              |                               |                              |                                         |
| IV- LV.SF.LTR  |                    | IV     | Wdr42a        | 98193     |        |        |         |                                     |                            |                              |                        |                                        |                |                                         |                             |                               |                                        |                                     |                 |                                   |                            |                        |                      |                       |                       |                             |                                     |                                  |                                      |                              |                               |                              |                                         |
| IV- LV.SF.LTR  |                    | IV     | Zfp28         | 22690     |        |        |         |                                     |                            |                              |                        |                                        |                |                                         |                             |                               |                                        |                                     |                 |                                   |                            |                        |                      |                       |                       |                             |                                     |                                  |                                      |                              |                               |                              |                                         |
| IV- LV.SF.LTR  |                    | IV     | Zfp617        | 170938    |        |        |         |                                     |                            |                              |                        |                                        |                |                                         |                             |                               |                                        |                                     |                 |                                   |                            |                        |                      |                       |                       |                             |                                     |                                  |                                      |                              |                               |                              |                                         |
| IV- LV.SF.LTR  |                    | IV     | Zfp710        | 209225    |        |        |         |                                     |                            |                              |                        |                                        |                |                                         |                             |                               |                                        |                                     |                 |                                   |                            |                        |                      |                       |                       |                             |                                     |                                  |                                      |                              |                               |                              |                                         |
| IV- SIN. LV.SF |                    | IV     | 1810007M14Rik | 67367     |        |        |         |                                     |                            |                              |                        |                                        |                |                                         |                             |                               |                                        |                                     |                 |                                   |                            |                        |                      |                       |                       |                             |                                     |                                  |                                      |                              |                               |                              |                                         |
| IV- SIN. LV.SF |                    | IV     | 2210010L05Rik | 98682     |        |        |         |                                     |                            |                              |                        |                                        |                |                                         |                             |                               |                                        |                                     |                 |                                   |                            |                        |                      |                       |                       |                             |                                     |                                  |                                      |                              |                               |                              |                                         |
| IV- SIN. LV.SF |                    | IV     | 2610034M16Rik | 69239     |        |        |         | x                                   |                            |                              |                        |                                        |                |                                         |                             |                               |                                        |                                     |                 |                                   |                            |                        |                      |                       |                       |                             |                                     |                                  |                                      |                              |                               |                              |                                         |
| IV- SIN. LV.SF |                    | IV     | 4930534B04Rik | 75216     |        |        |         |                                     |                            |                              |                        |                                        |                |                                         |                             |                               |                                        |                                     |                 |                                   |                            |                        |                      |                       |                       |                             |                                     |                                  |                                      |                              |                               |                              |                                         |
| IV- SIN. LV.SF |                    | IV     | Abce1         | 24015     |        |        |         |                                     |                            |                              |                        |                                        |                |                                         |                             |                               |                                        |                                     |                 |                                   |                            |                        |                      |                       |                       |                             |                                     |                                  |                                      |                              |                               | x                            |                                         |
| IV- SIN. LV.SF |                    | IV     | Adarb1        | 110532    |        |        |         |                                     |                            |                              |                        |                                        |                |                                         |                             |                               |                                        |                                     |                 |                                   |                            |                        |                      |                       |                       |                             |                                     |                                  |                                      |                              |                               |                              |                                         |
| IV- SIN. LV.SF |                    | IV     | Armc1         | 74252     |        |        |         |                                     |                            |                              |                        |                                        |                |                                         |                             |                               |                                        |                                     |                 |                                   |                            |                        |                      |                       |                       |                             |                                     |                                  |                                      |                              |                               |                              |                                         |
| IV- SIN. LV.SF |                    | IV     | Ash11         | 192195    |        |        |         | x                                   |                            |                              |                        |                                        |                |                                         |                             |                               |                                        |                                     |                 |                                   |                            |                        |                      |                       |                       |                             |                                     |                                  |                                      |                              |                               |                              |                                         |
| IV- SIN. LV.SF |                    | IV     | Asx12         | 75302     |        |        |         |                                     |                            |                              |                        |                                        |                |                                         |                             |                               |                                        |                                     |                 |                                   |                            |                        |                      |                       |                       |                             |                                     |                                  |                                      |                              |                               |                              |                                         |
| IV- SIN. LV.SF |                    | IV     | Atp6v1h       | 108664    |        |        |         |                                     |                            |                              |                        |                                        |                |                                         |                             |                               |                                        |                                     |                 |                                   |                            |                        |                      |                       |                       |                             |                                     |                                  |                                      |                              |                               | x                            |                                         |
| IV- SIN. LV.SF |                    | IV     | Bcl2          | 12043     |        |        |         |                                     |                            |                              |                        |                                        |                | x                                       | x                           |                               |                                        |                                     |                 |                                   |                            |                        |                      |                       |                       |                             |                                     |                                  |                                      |                              |                               |                              |                                         |
| IV- SIN. LV.SF |                    | IV     | Bdh2          | 69772     |        |        |         |                                     |                            |                              |                        |                                        |                |                                         |                             |                               |                                        |                                     |                 |                                   |                            |                        |                      |                       |                       |                             |                                     |                                  |                                      |                              |                               |                              |                                         |
| IV- SIN. LV.SF |                    | IV     | Bpil2         | 270757    |        |        |         |                                     |                            |                              |                        |                                        |                |                                         |                             |                               |                                        |                                     |                 |                                   |                            |                        |                      |                       |                       |                             |                                     |                                  |                                      |                              |                               |                              |                                         |
| IV- SIN. LV.SF |                    | IV     | Btaf1         | 107182    |        |        |         |                                     |                            |                              |                        |                                        |                |                                         |                             |                               |                                        |                                     |                 |                                   |                            |                        |                      | x                     |                       |                             |                                     |                                  |                                      |                              |                               | x                            |                                         |
| IV- SIN. LV.SF |                    | IV     | Ccdc111       | 408022    |        |        |         |                                     |                            |                              |                        |                                        |                |                                         |                             |                               |                                        |                                     |                 |                                   |                            |                        |                      |                       |                       |                             |                                     |                                  |                                      |                              |                               |                              |                                         |
| IV- SIN. LV.SF |                    | IV     | Ccdc46        | 76380     |        |        |         |                                     |                            |                              |                        |                                        |                |                                         |                             |                               |                                        |                                     |                 |                                   |                            |                        |                      |                       |                       |                             |                                     |                                  |                                      |                              |                               |                              |                                         |
| IV- SIN. LV.SF |                    | IV     | Cdc42bpa      | 226751    |        |        |         |                                     |                            |                              |                        | x                                      |                |                                         |                             |                               |                                        |                                     |                 |                                   |                            |                        |                      |                       |                       | x                           | x                                   |                                  |                                      |                              |                               |                              |                                         |

| Vector         | primary DNA number | Source | Gene Symbol         | Entrez ID | RV cis | SB cis | All cis | BP:intracellular protein transport | BP: chromatin modification | BP:regulation of cell cycle | BP: cell cycle process | BP: protein amino acid phosphorylation | BP:cell cycle | BP: regulation of programmed cell death | BP:regulation of apoptosis | BP:immune system development | BP:hemopoietic or lymphoid organ dev. | BP:negative regulation of transcri | BP:hemopoiesis | BP:regulation of kinase activity | BP:B cell differentiation | BP:mitotic cell cycle | BP:cell cycle phase | BP:dephosphorylation | MF:hellcase activity | MF:protein kinase activity | MF:protein serine-threonine kinase | MF:protein transporter activity | MF:transcription repressor activity | MF:phosphoinositide binding | MF:GTPase activator activity | MF:pyrophosphatase activity | MF:phosphoprotein phosphatase activity |
|----------------|--------------------|--------|---------------------|-----------|--------|--------|---------|------------------------------------|----------------------------|-----------------------------|------------------------|----------------------------------------|---------------|-----------------------------------------|----------------------------|------------------------------|---------------------------------------|------------------------------------|----------------|----------------------------------|---------------------------|-----------------------|---------------------|----------------------|----------------------|----------------------------|------------------------------------|---------------------------------|-------------------------------------|-----------------------------|------------------------------|-----------------------------|----------------------------------------|
| IV- SIN. LV.SF |                    | IV     | Cdkal1              | 68916     |        |        |         |                                    |                            |                             |                        |                                        |               |                                         |                            |                              |                                       |                                    |                |                                  |                           |                       |                     |                      |                      |                            |                                    |                                 |                                     |                             |                              |                             |                                        |
| IV- SIN. LV.SF |                    | IV     | Cep192              | 70799     |        |        |         |                                    |                            |                             |                        |                                        |               |                                         |                            |                              |                                       |                                    |                |                                  |                           |                       |                     |                      |                      |                            |                                    |                                 |                                     |                             |                              |                             |                                        |
| IV- SIN. LV.SF |                    | IV     | Cfc1                | 12627     |        |        |         |                                    |                            |                             |                        |                                        |               |                                         |                            |                              |                                       |                                    |                |                                  |                           |                       |                     |                      |                      |                            |                                    |                                 |                                     |                             |                              |                             |                                        |
| IV- SIN. LV.SF |                    | IV     | Cit                 | 12704     |        |        |         |                                    |                            |                             | x                      | x                                      | x             |                                         |                            |                              |                                       |                                    |                |                                  |                           | x                     | x                   |                      |                      | x                          | x                                  |                                 |                                     |                             |                              |                             |                                        |
| IV- SIN. LV.SF |                    | IV     | Cyp2j6              | 13110     |        |        |         |                                    |                            |                             |                        |                                        |               |                                         |                            |                              |                                       |                                    |                |                                  |                           |                       |                     |                      |                      |                            |                                    |                                 |                                     |                             |                              |                             |                                        |
| IV- SIN. LV.SF |                    | IV     | D030051N19Rik       | 228361    |        |        |         |                                    |                            |                             |                        |                                        |               |                                         |                            |                              |                                       |                                    |                |                                  |                           |                       |                     |                      |                      |                            |                                    |                                 |                                     |                             |                              |                             |                                        |
| IV- SIN. LV.SF |                    | IV     | Dab2                | 13132     |        |        |         |                                    |                            |                             |                        |                                        |               |                                         |                            |                              |                                       |                                    |                |                                  |                           |                       |                     |                      |                      |                            |                                    |                                 |                                     |                             |                              |                             |                                        |
| IV- SIN. LV.SF |                    | IV     | Dhx15               | 13204     |        |        |         |                                    |                            |                             |                        |                                        |               |                                         |                            |                              |                                       |                                    |                |                                  |                           |                       |                     |                      | x                    |                            |                                    |                                 |                                     |                             |                              | x                           |                                        |
| IV- SIN. LV.SF |                    | IV     | Dhx36               | 72162     |        |        |         |                                    |                            |                             |                        |                                        |               |                                         |                            |                              |                                       |                                    |                |                                  |                           |                       |                     | x                    |                      |                            |                                    |                                 |                                     |                             |                              | x                           |                                        |
| IV- SIN. LV.SF |                    | IV     | Diap3               | 56419     |        |        |         |                                    |                            |                             |                        |                                        |               |                                         |                            |                              |                                       |                                    |                |                                  |                           |                       |                     |                      |                      |                            |                                    |                                 |                                     |                             |                              |                             |                                        |
| IV- SIN. LV.SF |                    | IV     | Dio2                | 13371     |        |        |         |                                    |                            |                             |                        |                                        |               |                                         |                            |                              |                                       |                                    |                |                                  |                           |                       |                     |                      |                      |                            |                                    |                                 |                                     |                             |                              |                             |                                        |
| IV- SIN. LV.SF |                    | IV     | E130309F12Rik       | 272031    |        |        |         |                                    |                            |                             |                        |                                        |               |                                         |                            |                              |                                       |                                    |                |                                  |                           |                       |                     |                      |                      |                            |                                    |                                 |                                     |                             |                              |                             |                                        |
| IV- SIN. LV.SF |                    | IV     | Edd1                | 70790     |        |        |         |                                    |                            |                             |                        |                                        |               |                                         |                            |                              |                                       |                                    |                |                                  |                           |                       |                     |                      |                      |                            |                                    |                                 |                                     |                             |                              |                             |                                        |
| IV- SIN. LV.SF |                    | IV     | EG432825            | 432825    |        |        |         |                                    |                            |                             |                        |                                        |               |                                         |                            |                              |                                       |                                    |                |                                  |                           |                       |                     |                      |                      |                            |                                    |                                 |                                     |                             |                              |                             |                                        |
| IV- SIN. LV.SF |                    | IV     | Emcn                | 59308     |        |        |         |                                    |                            |                             |                        |                                        |               |                                         |                            |                              |                                       |                                    |                |                                  |                           |                       |                     |                      |                      |                            |                                    |                                 |                                     |                             |                              |                             |                                        |
| IV- SIN. LV.SF |                    | IV     | ENSMUSG000000055963 | 208820    |        |        |         |                                    |                            |                             |                        |                                        |               |                                         |                            |                              |                                       |                                    |                |                                  |                           |                       |                     |                      |                      |                            |                                    |                                 |                                     |                             |                              |                             |                                        |
| IV- SIN. LV.SF |                    | IV     | ENSMUSG000000063249 |           |        |        |         |                                    |                            |                             |                        |                                        |               |                                         |                            |                              |                                       |                                    |                |                                  |                           |                       |                     |                      |                      |                            |                                    |                                 |                                     |                             |                              |                             |                                        |
| IV- SIN. LV.SF |                    | IV     | Epha4               | 13838     |        |        |         |                                    |                            |                             |                        | x                                      |               |                                         |                            |                              |                                       |                                    |                |                                  |                           |                       |                     |                      |                      | x                          | x                                  |                                 |                                     |                             |                              |                             |                                        |
| IV- SIN. LV.SF |                    | IV     | Exoc2               | 66482     |        |        |         |                                    |                            |                             |                        |                                        |               |                                         |                            |                              |                                       |                                    |                |                                  |                           |                       |                     |                      |                      |                            |                                    |                                 |                                     |                             |                              |                             |                                        |
| IV- SIN. LV.SF |                    | IV     | Fbxl10              | 30841     | 6      |        | x       |                                    | x                          |                             |                        |                                        |               |                                         |                            |                              |                                       |                                    |                |                                  |                           |                       |                     |                      |                      |                            |                                    |                                 |                                     |                             |                              |                             |                                        |

| Vector         | primary DNA number | Source | Gene Symbol   | Entrez ID | RV cis | SB cis | All cis | BP:intracellular protein transport | BP: chromatin modification | BP:regulation of cell cycle | BP: cell cycle process | BP: protein amino acid phosphorylation | BP:cell cycle | BP: regulation of programmed cell death | BP:regulation of apoptosis | BP:immune system development | BP:hempoietic or lymphoid organ dev. | BP:negative regulation of transcri | BP:hempopotesis | BP:regulation of kinase activity | BP:B cell differentiation | BP:mitotic cell cycle | BP:cell cycle phase | BP:dephosphorylation | MF:helicase activity | MF:protein kinase activity | MF:protein serine-threonine kinase | MF:protein transporter activity | MF:transcription repressor activity | MF:phosphoinositide binding | MF:GTPase activator activity | MF:pyrophosphatase activity | MF:phosphoprotein phosphatase activity |
|----------------|--------------------|--------|---------------|-----------|--------|--------|---------|------------------------------------|----------------------------|-----------------------------|------------------------|----------------------------------------|---------------|-----------------------------------------|----------------------------|------------------------------|--------------------------------------|------------------------------------|-----------------|----------------------------------|---------------------------|-----------------------|---------------------|----------------------|----------------------|----------------------------|------------------------------------|---------------------------------|-------------------------------------|-----------------------------|------------------------------|-----------------------------|----------------------------------------|
| IV- SIN. LV.SF |                    | IV     | Foxp1         | 108655    |        |        |         |                                    |                            |                             |                        |                                        |               |                                         |                            | x                            | x                                    | x                                  | x               |                                  | x                         |                       |                     |                      |                      |                            |                                    |                                 | x                                   |                             |                              |                             |                                        |
| IV- SIN. LV.SF |                    | IV     | fut10         | 171167    |        |        |         |                                    |                            |                             |                        |                                        |               |                                         |                            |                              |                                      |                                    |                 |                                  |                           |                       |                     |                      |                      |                            |                                    |                                 |                                     |                             |                              |                             |                                        |
| IV- SIN. LV.SF |                    | IV     | G430022H21Rik | 210529    |        |        |         |                                    |                            |                             |                        |                                        |               |                                         |                            |                              |                                      |                                    |                 |                                  |                           |                       |                     |                      |                      |                            |                                    |                                 |                                     |                             |                              |                             |                                        |
| IV- SIN. LV.SF |                    | IV     | Gad1l         | 73748     |        |        |         |                                    |                            |                             |                        |                                        |               |                                         |                            |                              |                                      |                                    |                 |                                  |                           |                       |                     |                      |                      |                            |                                    |                                 |                                     |                             |                              |                             |                                        |
| IV- SIN. LV.SF |                    | IV     | Gatad2b       | 229542    |        |        |         |                                    |                            |                             |                        |                                        |               |                                         |                            |                              |                                      |                                    |                 |                                  |                           |                       |                     |                      |                      |                            |                                    |                                 |                                     |                             |                              |                             |                                        |
| IV- SIN. LV.SF |                    | IV     | Gm672         | 269037    |        |        |         |                                    |                            |                             |                        |                                        |               |                                         |                            |                              |                                      |                                    |                 |                                  |                           |                       |                     |                      |                      |                            |                                    |                                 |                                     |                             |                              |                             |                                        |
| IV- SIN. LV.SF |                    | IV     | Hspa14        | 50497     |        |        |         |                                    |                            |                             |                        |                                        |               |                                         |                            |                              |                                      |                                    |                 |                                  |                           |                       |                     |                      |                      |                            |                                    |                                 |                                     |                             |                              |                             |                                        |
| IV- SIN. LV.SF |                    | IV     | Irf2          | 16363     |        |        |         |                                    |                            |                             |                        |                                        |               |                                         |                            |                              |                                      |                                    |                 |                                  |                           |                       |                     |                      |                      |                            |                                    |                                 |                                     |                             |                              |                             |                                        |
| IV- SIN. LV.SF |                    | IV     | Itgb8         | 320910    |        |        |         |                                    |                            |                             |                        |                                        |               |                                         |                            |                              |                                      |                                    |                 |                                  |                           |                       |                     |                      |                      |                            |                                    |                                 |                                     |                             |                              |                             |                                        |
| IV- SIN. LV.SF |                    | IV     | Lcorl         | 209707    |        |        |         |                                    |                            |                             |                        |                                        |               |                                         |                            |                              |                                      |                                    |                 |                                  |                           |                       |                     |                      |                      |                            |                                    |                                 |                                     |                             |                              |                             |                                        |
| IV- SIN. LV.SF |                    | IV     | Lmbrd1        | 68421     |        |        |         |                                    |                            |                             |                        |                                        |               |                                         |                            |                              |                                      |                                    |                 |                                  |                           |                       |                     |                      |                      |                            |                                    |                                 |                                     |                             |                              |                             |                                        |
| IV- SIN. LV.SF |                    | IV     | LOC381483     | 381483    |        |        |         |                                    |                            |                             |                        |                                        |               |                                         |                            |                              |                                      |                                    |                 |                                  |                           |                       |                     |                      |                      |                            |                                    |                                 |                                     |                             |                              |                             |                                        |
| IV- SIN. LV.SF |                    | IV     | LOC665775     | 665775    |        |        |         |                                    |                            |                             |                        |                                        |               |                                         |                            |                              |                                      |                                    |                 |                                  |                           |                       |                     |                      |                      |                            |                                    |                                 |                                     |                             |                              |                             |                                        |
| IV- SIN. LV.SF |                    | IV     | Lrrc8b        | 433926    |        |        |         |                                    |                            |                             |                        |                                        |               |                                         |                            |                              |                                      |                                    |                 |                                  |                           |                       |                     |                      |                      |                            |                                    |                                 |                                     |                             |                              |                             |                                        |
| IV- SIN. LV.SF |                    | IV     | Meis1         | 17268     | 27     |        | x       |                                    |                            |                             |                        |                                        |               |                                         |                            |                              |                                      |                                    |                 |                                  |                           |                       |                     |                      |                      |                            |                                    |                                 |                                     |                             |                              |                             |                                        |
| IV- SIN. LV.SF |                    | IV     | Mllt6         | 246198    |        |        |         |                                    |                            |                             |                        |                                        |               |                                         |                            |                              |                                      |                                    |                 |                                  |                           |                       |                     |                      |                      |                            |                                    |                                 |                                     |                             |                              |                             |                                        |
| IV- SIN. LV.SF |                    | IV     | Morn3         | 74890     |        |        |         |                                    |                            |                             |                        |                                        |               |                                         |                            |                              |                                      |                                    |                 |                                  |                           |                       |                     |                      |                      |                            |                                    |                                 |                                     |                             |                              |                             |                                        |
| IV- SIN. LV.SF |                    | IV     | Mrpl1         | 94061     |        |        |         |                                    |                            |                             |                        |                                        |               |                                         |                            |                              |                                      |                                    |                 |                                  |                           |                       |                     |                      |                      |                            |                                    |                                 |                                     |                             |                              |                             |                                        |
| IV- SIN. LV.SF |                    | IV     | Myst4         | 54169     |        |        |         | x                                  |                            |                             |                        |                                        |               |                                         |                            |                              |                                      | x                                  |                 |                                  |                           |                       |                     |                      |                      |                            |                                    |                                 | x                                   |                             |                              |                             |                                        |
| IV- SIN. LV.SF |                    | IV     | Nalcn         | 338370    |        |        |         |                                    |                            |                             |                        |                                        |               |                                         |                            |                              |                                      |                                    |                 |                                  |                           |                       |                     |                      |                      |                            |                                    |                                 |                                     |                             |                              |                             |                                        |
| IV- SIN. LV.SF |                    | IV     | Narg2         | 93697     |        |        |         |                                    |                            |                             |                        |                                        |               |                                         |                            |                              |                                      |                                    |                 |                                  |                           |                       |                     |                      |                      |                            |                                    |                                 |                                     |                             |                              |                             |                                        |
| IV- SIN. LV.SF |                    | IV     | Nrxn1         | 18189     |        |        |         |                                    |                            |                             |                        |                                        |               |                                         |                            |                              |                                      |                                    |                 |                                  |                           |                       |                     |                      |                      |                            |                                    |                                 |                                     |                             |                              |                             |                                        |

| Vector         | primary DNA number | Source | Gene Symbol        | Entrez ID | RV cis | SB cis | All cis | BP:intracellular protein transport | BP: chromatin modification | BP:regulation of cell cycle | BP: cell cycle process | BP: protein amino acid phosphorylation | BP:cell cycle | BP: regulation of programmed cell death | BP:regulation of apoptosis | BP:immune system development | BP:hemopoietic or lymphoid organ dev. | BP:negative regulation of transcri | BP:hemopoiesis | BP:regulation of kinase activity | BP:B cell differentiation | BP:mitotic cell cycle | BP:cell cycle phase | BP:dephosphorylation | MF:helicase activity | MF:protein kinase activity | MF:protein serine-threonine kinase | MF:protein transporter activity | MF:transcription repressor activity | MF:phosphoinositide binding | MF:GTPase activator activity | MF:pyrophosphatase activity | MF:phosphoprotein phosphatase activity |
|----------------|--------------------|--------|--------------------|-----------|--------|--------|---------|------------------------------------|----------------------------|-----------------------------|------------------------|----------------------------------------|---------------|-----------------------------------------|----------------------------|------------------------------|---------------------------------------|------------------------------------|----------------|----------------------------------|---------------------------|-----------------------|---------------------|----------------------|----------------------|----------------------------|------------------------------------|---------------------------------|-------------------------------------|-----------------------------|------------------------------|-----------------------------|----------------------------------------|
| IV- SIN. LV.SF |                    | IV     | Nudcd3             | 209586    |        |        |         |                                    |                            |                             |                        |                                        |               |                                         |                            |                              |                                       |                                    |                |                                  |                           |                       |                     |                      |                      |                            |                                    |                                 |                                     |                             |                              |                             |                                        |
| IV- SIN. LV.SF |                    | IV     | Nudt12             | 67993     |        |        |         |                                    |                            |                             |                        |                                        |               |                                         |                            |                              |                                       |                                    |                |                                  |                           |                       |                     |                      |                      |                            |                                    |                                 |                                     |                             |                              |                             |                                        |
| IV- SIN. LV.SF |                    | IV     | OTTMUSG00000008561 | 666048    |        |        |         |                                    |                            |                             |                        |                                        |               |                                         |                            |                              |                                       |                                    |                |                                  |                           |                       |                     |                      |                      |                            |                                    |                                 |                                     |                             |                              |                             |                                        |
| IV- SIN. LV.SF |                    | IV     | Parp2              | 11546     |        |        |         |                                    |                            |                             |                        |                                        |               |                                         |                            |                              |                                       |                                    |                |                                  |                           |                       |                     |                      |                      |                            |                                    |                                 |                                     |                             |                              |                             |                                        |
| IV- SIN. LV.SF |                    | IV     | parp8              | 52552     |        |        |         |                                    |                            |                             |                        |                                        |               |                                         |                            |                              |                                       |                                    |                |                                  |                           |                       |                     |                      |                      |                            |                                    |                                 |                                     |                             |                              |                             |                                        |
| IV- SIN. LV.SF |                    | IV     | Pcaf               | 18519     |        |        |         | x                                  |                            |                             |                        |                                        |               |                                         |                            |                              |                                       |                                    |                |                                  |                           |                       |                     |                      |                      |                            |                                    |                                 |                                     |                             |                              |                             |                                        |
| IV- SIN. LV.SF |                    | IV     | Pdhx               | 27402     |        |        |         |                                    |                            |                             |                        |                                        |               |                                         |                            |                              |                                       |                                    |                |                                  |                           |                       |                     |                      |                      |                            |                                    |                                 |                                     |                             |                              |                             |                                        |
| IV- SIN. LV.SF |                    | IV     | Pftk1              | 18647     |        |        |         |                                    |                            |                             |                        | x                                      |               |                                         |                            |                              |                                       |                                    |                |                                  |                           |                       |                     |                      |                      |                            | x                                  | x                               |                                     |                             |                              |                             |                                        |
| IV- SIN. LV.SF |                    | IV     | Phf14              | 75725     |        |        |         |                                    |                            |                             |                        |                                        |               |                                         |                            |                              |                                       |                                    |                |                                  |                           |                       |                     |                      |                      |                            |                                    |                                 |                                     |                             |                              |                             |                                        |
| IV- SIN. LV.SF |                    | IV     | Pik4ca             | 224020    |        |        |         |                                    |                            |                             |                        |                                        |               |                                         |                            |                              |                                       |                                    |                |                                  |                           |                       |                     |                      |                      |                            |                                    |                                 |                                     |                             |                              |                             |                                        |
| IV- SIN. LV.SF |                    | IV     | Ppp1r12a           | 17931     |        |        |         |                                    |                            |                             |                        |                                        |               |                                         |                            |                              |                                       |                                    |                |                                  |                           |                       |                     |                      |                      |                            |                                    |                                 |                                     |                             |                              | x                           |                                        |
| IV- SIN. LV.SF |                    | IV     | Ppp3ca             | 19055     |        |        |         | x                                  |                            | x                           |                        | x                                      |               |                                         |                            |                              |                                       |                                    |                |                                  |                           | x                     | x                   | x                    |                      |                            |                                    |                                 |                                     |                             |                              | x                           |                                        |
| IV- SIN. LV.SF |                    | IV     | Rab11fip3          | 215445    |        |        |         |                                    |                            |                             |                        |                                        |               |                                         |                            |                              |                                       |                                    |                |                                  |                           |                       |                     |                      |                      |                            |                                    |                                 |                                     |                             |                              |                             |                                        |
| IV- SIN. LV.SF |                    | IV     | Rab38              | 72433     |        |        |         |                                    |                            |                             |                        | x                                      |               |                                         |                            |                              |                                       |                                    |                |                                  |                           |                       |                     |                      |                      | x                          |                                    |                                 |                                     |                             |                              |                             |                                        |
| IV- SIN. LV.SF |                    | IV     | Rbm26              | 74213     |        |        |         |                                    |                            |                             |                        |                                        |               |                                         |                            |                              |                                       |                                    |                |                                  |                           |                       |                     |                      |                      |                            |                                    |                                 |                                     |                             |                              |                             |                                        |
| IV- SIN. LV.SF |                    | IV     | Rttm               | 246102    |        |        |         |                                    |                            |                             |                        |                                        |               |                                         |                            |                              |                                       |                                    |                |                                  |                           |                       |                     |                      |                      |                            |                                    |                                 |                                     |                             |                              |                             |                                        |
| IV- SIN. LV.SF |                    | IV     | Satb2              | 212712    |        |        |         |                                    |                            |                             |                        |                                        |               |                                         |                            |                              |                                       |                                    |                |                                  |                           |                       |                     |                      |                      |                            |                                    |                                 |                                     |                             |                              |                             |                                        |
| IV- SIN. LV.SF |                    | IV     | Sesn1              | 140742    |        |        |         |                                    | x                          | x                           |                        | x                                      |               |                                         |                            |                              |                                       |                                    |                |                                  |                           |                       |                     |                      |                      |                            |                                    |                                 |                                     |                             |                              |                             |                                        |
| IV- SIN. LV.SF |                    | IV     | Slc28a2            | 269346    |        |        |         |                                    |                            |                             |                        |                                        |               |                                         |                            |                              |                                       |                                    |                |                                  |                           |                       |                     |                      |                      |                            |                                    |                                 |                                     |                             |                              |                             |                                        |
| IV- SIN. LV.SF |                    | IV     | Slit2              | 20563     |        |        |         |                                    |                            |                             |                        |                                        |               |                                         |                            |                              |                                       |                                    |                |                                  |                           |                       |                     |                      |                      |                            |                                    |                                 |                                     |                             |                              |                             |                                        |
| IV- SIN. LV.SF |                    | IV     | Sorl1              | 20660     |        |        |         |                                    |                            |                             |                        |                                        |               |                                         |                            |                              |                                       |                                    |                |                                  |                           |                       |                     |                      |                      |                            |                                    |                                 |                                     |                             |                              |                             |                                        |

| Vector          | primary DNA number | Source | Gene Symbol   | Entrez ID | RV cis | SB cis | All cis | BP: intracellular protein transport | BP: chromatin modification | BP: regulation of cell cycle | BP: cell cycle process | BP: protein amino acid phosphorylation | BP: cell cycle | BP: regulation of programmed cell death | BP: regulation of apoptosis | BP: immune system development | BP: hemopoietic or lymphoid organ dev. | BP: negative regulation of transcri | BP: hemopoiesis | BP: regulation of kinase activity | BP: B cell differentiation | BP: mitotic cell cycle | BP: cell cycle phase | BP: dephosphorylation | MF: helicase activity | MF: protein kinase activity | MF: protein serine-threonine kinase | MF: protein transporter activity | MF: transcription repressor activity | MF: phosphoinositide binding | MF: GTPase activator activity | MF: pyrophosphatase activity | MF: phosphoprotein phosphatase activity |
|-----------------|--------------------|--------|---------------|-----------|--------|--------|---------|-------------------------------------|----------------------------|------------------------------|------------------------|----------------------------------------|----------------|-----------------------------------------|-----------------------------|-------------------------------|----------------------------------------|-------------------------------------|-----------------|-----------------------------------|----------------------------|------------------------|----------------------|-----------------------|-----------------------|-----------------------------|-------------------------------------|----------------------------------|--------------------------------------|------------------------------|-------------------------------|------------------------------|-----------------------------------------|
| IV- SIN. LV.SF  |                    | IV     | Stxbp5        | 78808     |        |        |         |                                     |                            |                              |                        |                                        |                |                                         |                             |                               |                                        |                                     |                 |                                   |                            |                        |                      |                       |                       |                             |                                     |                                  |                                      |                              |                               |                              |                                         |
| IV- SIN. LV.SF  |                    | IV     | Sumf1         | 58911     |        |        |         |                                     |                            |                              |                        |                                        |                |                                         |                             |                               |                                        |                                     |                 |                                   |                            |                        |                      |                       |                       |                             |                                     |                                  |                                      |                              |                               |                              |                                         |
| IV- SIN. LV.SF  |                    | IV     | Sybl1         | 20955     |        |        |         | x                                   |                            |                              |                        |                                        |                |                                         |                             |                               |                                        |                                     |                 |                                   |                            |                        |                      |                       |                       |                             |                                     | x                                |                                      |                              |                               |                              |                                         |
| IV- SIN. LV.SF  |                    | IV     | Thoc2         | 331401    |        |        |         |                                     |                            |                              |                        |                                        |                |                                         |                             |                               |                                        |                                     |                 |                                   |                            |                        |                      |                       |                       |                             |                                     |                                  |                                      |                              |                               |                              |                                         |
| IV- SIN. LV.SF  |                    | IV     | Ticam2        | 225471    |        |        |         |                                     |                            |                              |                        |                                        |                |                                         |                             |                               |                                        |                                     |                 |                                   |                            |                        |                      |                       |                       |                             |                                     |                                  |                                      |                              |                               |                              |                                         |
| IV- SIN. LV.SF  |                    | IV     | Tpk1          | 29807     |        | 2      | x       |                                     |                            |                              |                        |                                        |                |                                         |                             |                               |                                        |                                     |                 |                                   |                            |                        |                      |                       |                       |                             |                                     |                                  |                                      |                              |                               |                              |                                         |
| IV- SIN. LV.SF  |                    | IV     | Trim27        | 19720     |        |        |         |                                     |                            |                              |                        |                                        |                |                                         |                             |                               |                                        | x                                   |                 |                                   |                            |                        |                      |                       |                       |                             |                                     |                                  |                                      |                              |                               |                              |                                         |
| IV- SIN. LV.SF  |                    | IV     | Unc84a        | 77053     |        |        |         |                                     |                            |                              |                        |                                        |                |                                         |                             |                               |                                        |                                     |                 |                                   |                            |                        |                      |                       |                       |                             |                                     |                                  |                                      |                              |                               |                              |                                         |
| IV- SIN. LV.SF  |                    | IV     | Wdr67         | 210544    |        |        |         |                                     |                            |                              |                        |                                        |                |                                         |                             |                               |                                        |                                     |                 |                                   |                            |                        |                      |                       |                       |                             |                                     |                                  |                                      |                              | x                             |                              |                                         |
| IV- SIN. LV.SF  |                    | IV     | Zfp787        | 67109     |        |        |         |                                     |                            |                              |                        |                                        |                |                                         |                             |                               |                                        |                                     |                 |                                   |                            |                        |                      |                       |                       |                             |                                     |                                  |                                      |                              |                               |                              |                                         |
| IV- SIN. RV.PGK |                    | IV     | 4922503N01Rik | 230603    |        |        |         |                                     |                            |                              |                        |                                        |                |                                         |                             |                               |                                        |                                     |                 |                                   |                            |                        |                      |                       |                       |                             |                                     |                                  |                                      |                              |                               |                              |                                         |
| IV- SIN. RV.PGK |                    | IV     | 4930473A06Rik | 320226    |        |        |         |                                     |                            |                              |                        |                                        |                |                                         |                             |                               |                                        |                                     |                 |                                   |                            |                        |                      |                       |                       |                             |                                     |                                  |                                      |                              |                               |                              |                                         |
| IV- SIN. RV.PGK |                    | IV     | 4930512M02Rik | 75110     |        |        |         |                                     |                            |                              |                        |                                        |                |                                         |                             |                               |                                        |                                     |                 |                                   |                            |                        |                      |                       |                       |                             |                                     |                                  |                                      |                              |                               |                              |                                         |
| IV- SIN. RV.PGK |                    | IV     | 4933424C13Rik | 71130     |        |        |         |                                     |                            |                              |                        |                                        |                |                                         |                             |                               |                                        |                                     |                 |                                   |                            |                        |                      |                       |                       |                             |                                     |                                  |                                      |                              |                               |                              |                                         |
| IV- SIN. RV.PGK |                    | IV     | 4933440H19Rik | 71254     |        |        |         |                                     |                            |                              |                        |                                        |                |                                         |                             |                               |                                        |                                     |                 |                                   |                            |                        |                      |                       |                       |                             |                                     |                                  |                                      |                              |                               |                              |                                         |
| IV- SIN. RV.PGK |                    | IV     | 5033411D12Rik | 192136    |        |        |         |                                     |                            |                              |                        |                                        |                |                                         |                             |                               |                                        |                                     |                 |                                   |                            |                        |                      |                       |                       |                             |                                     |                                  |                                      |                              |                               |                              |                                         |
| IV- SIN. RV.PGK |                    | IV     | 6330512M04Rik | 320802    |        |        |         |                                     |                            |                              |                        |                                        |                |                                         |                             |                               |                                        |                                     |                 |                                   |                            |                        |                      |                       |                       |                             |                                     |                                  |                                      |                              |                               |                              |                                         |
| IV- SIN. RV.PGK |                    | IV     | Aacs          | 78894     |        |        |         |                                     |                            |                              |                        |                                        |                |                                         |                             |                               |                                        |                                     |                 |                                   |                            |                        |                      |                       |                       |                             |                                     |                                  |                                      |                              |                               |                              |                                         |
| IV- SIN. RV.PGK |                    | IV     | Acvr2a        | 11480     |        |        |         |                                     |                            |                              |                        | x                                      |                |                                         |                             |                               |                                        |                                     |                 |                                   |                            |                        |                      |                       |                       | x                           | x                                   |                                  |                                      |                              |                               |                              |                                         |
| IV- SIN. RV.PGK |                    | IV     | Aebp2         | 11569     |        |        |         |                                     |                            |                              |                        |                                        |                |                                         |                             |                               |                                        |                                     |                 |                                   |                            |                        |                      |                       |                       |                             |                                     |                                  | x                                    |                              |                               |                              |                                         |
| IV- SIN. RV.PGK |                    | IV     | Aff3          | 16764     |        |        |         |                                     |                            |                              |                        |                                        |                |                                         |                             |                               |                                        |                                     |                 |                                   |                            |                        |                      |                       |                       |                             |                                     |                                  |                                      |                              |                               |                              |                                         |
| IV- SIN. RV.PGK |                    | IV     | AK007247      | 108161    |        |        |         |                                     |                            |                              |                        |                                        |                |                                         |                             |                               |                                        |                                     |                 |                                   |                            |                        |                      |                       |                       |                             |                                     |                                  |                                      |                              |                               |                              |                                         |

| Vector          | primary DNA number | Source | Gene Symbol   | Entrez ID | RV cis | SB cis | All cis | BP: intracellular protein transport | BP: chromatin modification | BP: regulation of cell cycle | BP: cell cycle process | BP: protein amino acid phosphorylation | BP: cell cycle | BP: regulation of programmed cell death | BP: regulation of apoptosis | BP: immune system development | BP: hemopoietic or lymphoid organ dev. | BP: negative regulation of transcri | BP: hemopoiesis | BP: regulation of kinase activity | BP: B cell differentiation | BP: mitotic cell cycle | BP: cell cycle phase | BP: dephosphorylation | MF: helicase activity | MF: protein kinase activity | MF: protein serine-threonine kinase | MF: protein transporter activity | MF: transcription repressor activity | MF: phosphoinositide binding | MF: GTPase activator activity | MF: pyrophosphatase activity | MF: phosphoprotein phosphatase activity |
|-----------------|--------------------|--------|---------------|-----------|--------|--------|---------|-------------------------------------|----------------------------|------------------------------|------------------------|----------------------------------------|----------------|-----------------------------------------|-----------------------------|-------------------------------|----------------------------------------|-------------------------------------|-----------------|-----------------------------------|----------------------------|------------------------|----------------------|-----------------------|-----------------------|-----------------------------|-------------------------------------|----------------------------------|--------------------------------------|------------------------------|-------------------------------|------------------------------|-----------------------------------------|
| IV- SIN. RV.PGK |                    | IV     | Akr1c19       | 432720    |        |        |         |                                     |                            |                              |                        |                                        |                |                                         |                             |                               |                                        |                                     |                 |                                   |                            |                        |                      |                       |                       |                             |                                     |                                  |                                      |                              |                               |                              |                                         |
| IV- SIN. RV.PGK |                    | IV     | Anp32e        | 66471     |        |        |         |                                     |                            |                              |                        |                                        |                |                                         |                             |                               |                                        |                                     |                 |                                   |                            |                        |                      |                       |                       |                             |                                     |                                  |                                      |                              |                               |                              |                                         |
| IV- SIN. RV.PGK |                    | IV     | Arid1b        | 239985    |        |        |         |                                     |                            |                              |                        |                                        |                |                                         |                             |                               |                                        |                                     |                 |                                   |                            |                        |                      |                       |                       |                             |                                     |                                  |                                      |                              |                               |                              |                                         |
| IV- SIN. RV.PGK |                    | IV     | Arid2         | 77044     |        |        |         |                                     |                            |                              |                        |                                        |                |                                         |                             |                               |                                        |                                     |                 |                                   |                            |                        |                      |                       |                       |                             |                                     |                                  |                                      |                              |                               |                              |                                         |
| IV- SIN. RV.PGK |                    | IV     | arid5b        | 71371     |        |        |         |                                     |                            |                              |                        |                                        |                |                                         |                             |                               |                                        |                                     |                 |                                   |                            |                        |                      |                       |                       |                             |                                     |                                  |                                      |                              |                               |                              |                                         |
| IV- SIN. RV.PGK |                    | IV     | Atp2b4        | 100038692 |        |        |         |                                     |                            |                              |                        |                                        |                |                                         |                             |                               |                                        |                                     |                 |                                   |                            |                        |                      |                       |                       |                             |                                     |                                  |                                      |                              |                               |                              |                                         |
| IV- SIN. RV.PGK |                    | IV     | AW549877      | 106064    |        |        |         |                                     |                            |                              |                        |                                        |                |                                         |                             |                               |                                        |                                     |                 |                                   |                            |                        |                      |                       |                       |                             |                                     |                                  |                                      |                              |                               |                              |                                         |
| IV- SIN. RV.PGK |                    | IV     | B9d2          | 232987    |        |        |         |                                     |                            |                              |                        |                                        |                |                                         |                             |                               |                                        |                                     |                 |                                   |                            |                        |                      |                       |                       |                             |                                     |                                  |                                      |                              |                               |                              |                                         |
| IV- SIN. RV.PGK |                    | IV     | Banp I        | 53325     |        |        |         | x                                   |                            |                              |                        |                                        | x              |                                         |                             |                               |                                        |                                     |                 |                                   |                            |                        |                      |                       |                       |                             |                                     |                                  |                                      |                              |                               |                              |                                         |
| IV- SIN. RV.PGK |                    | IV     | BC003940      | 192173    |        |        |         |                                     |                            |                              |                        |                                        |                |                                         |                             |                               |                                        |                                     |                 |                                   |                            |                        |                      |                       |                       |                             |                                     |                                  |                                      |                              |                               |                              |                                         |
| IV- SIN. RV.PGK |                    | IV     | Brd2          | 14312     | 2      |        | x       |                                     |                            |                              |                        |                                        |                |                                         |                             |                               |                                        |                                     |                 |                                   |                            |                        |                      |                       |                       | x                           | x                                   |                                  |                                      |                              |                               |                              |                                         |
| IV- SIN. RV.PGK |                    | IV     | Btk           | 12229     |        |        |         |                                     |                            |                              |                        | x                                      |                |                                         |                             |                               |                                        |                                     |                 |                                   |                            |                        |                      |                       |                       | x                           | x                                   |                                  |                                      |                              |                               |                              |                                         |
| IV- SIN. RV.PGK |                    | IV     | C130039O16Rik | 238317    |        |        |         |                                     |                            |                              |                        |                                        |                |                                         |                             |                               |                                        |                                     |                 |                                   |                            |                        |                      |                       |                       |                             |                                     |                                  |                                      |                              |                               |                              |                                         |
| IV- SIN. RV.PGK |                    | IV     | Ccnd2         | 12444     | 22     |        | x       |                                     | x                          | x                            |                        | x                                      |                |                                         |                             |                               |                                        |                                     |                 |                                   |                            |                        |                      |                       |                       |                             |                                     |                                  |                                      |                              |                               |                              |                                         |
| IV- SIN. RV.PGK |                    | IV     | Ccnl1         | 56706     |        |        |         |                                     | x                          | x                            |                        | x                                      |                |                                         |                             |                               |                                        |                                     |                 |                                   |                            |                        |                      |                       |                       |                             |                                     |                                  |                                      |                              |                               |                              |                                         |
| IV- SIN. RV.PGK |                    | IV     | Ccr1          | 12768     | 3      |        | x       |                                     |                            |                              |                        |                                        |                |                                         |                             | x                             | x                                      |                                     | x               |                                   |                            |                        |                      |                       |                       |                             |                                     |                                  |                                      |                              |                               |                              |                                         |
| IV- SIN. RV.PGK |                    | IV     | Ccr7          | 12775     | 7      |        | x       |                                     |                            |                              |                        |                                        |                |                                         |                             |                               |                                        |                                     |                 |                                   |                            |                        |                      |                       |                       |                             |                                     |                                  |                                      |                              |                               |                              |                                         |
| IV- SIN. RV.PGK |                    | IV     | Cct4          | 12464     |        |        |         |                                     |                            |                              |                        |                                        |                |                                         |                             |                               |                                        |                                     |                 |                                   |                            |                        |                      |                       |                       |                             |                                     |                                  |                                      |                              |                               |                              |                                         |
| IV- SIN. RV.PGK |                    | IV     | Cdc14a        | 229776    |        |        |         |                                     |                            |                              |                        |                                        | x              |                                         |                             |                               |                                        |                                     |                 |                                   |                            |                        |                      | x                     |                       |                             |                                     |                                  |                                      |                              |                               | x                            |                                         |
| IV- SIN. RV.PGK |                    | IV     | Cdc42ep3      | 260409    |        |        |         |                                     |                            |                              |                        |                                        |                |                                         |                             |                               |                                        |                                     |                 |                                   |                            |                        |                      |                       |                       |                             |                                     |                                  |                                      |                              |                               |                              |                                         |
| IV- SIN. RV.PGK |                    | IV     | Centd3        | 106952    |        |        |         |                                     |                            |                              |                        |                                        |                |                                         |                             |                               |                                        |                                     |                 |                                   |                            |                        |                      |                       |                       |                             |                                     |                                  |                                      | x                            | x                             |                              |                                         |

| Vector          | primary DNA number | Source | Gene Symbol | Entrez ID | RV cis | SB cis | All cis | BP: intracellular protein transport | BP: chromatin modification | BP: regulation of cell cycle | BP: cell cycle process | BP: protein amino acid phosphorylation | BP: cell cycle | BP: regulation of programmed cell death | BP: regulation of apoptosis | BP: immune system development | BP: hemopoietic or lymphoid organ dev. | BP: negative regulation of transcri | BP: hemopoiesis | BP: regulation of kinase activity | BP: B cell differentiation | BP: mitotic cell cycle | BP: cell cycle phase | BP: dephosphorylation | MF: helicase activity | MF: protein kinase activity | MF: protein serine-threonine kinase | MF: protein transporter activity | MF: transcription repressor activity | MF: phosphoinositide binding | MF: GTPase activator activity | MF: pyrophosphatase activity | MF: phosphoprotein phosphatase activity |
|-----------------|--------------------|--------|-------------|-----------|--------|--------|---------|-------------------------------------|----------------------------|------------------------------|------------------------|----------------------------------------|----------------|-----------------------------------------|-----------------------------|-------------------------------|----------------------------------------|-------------------------------------|-----------------|-----------------------------------|----------------------------|------------------------|----------------------|-----------------------|-----------------------|-----------------------------|-------------------------------------|----------------------------------|--------------------------------------|------------------------------|-------------------------------|------------------------------|-----------------------------------------|
| IV- SIN. RV.PGK |                    | IV     | Clec2d      | 93694     |        |        |         |                                     |                            |                              |                        |                                        |                | x                                       | x                           | x                             | x                                      |                                     | x               |                                   |                            |                        |                      |                       |                       |                             |                                     |                                  |                                      |                              |                               |                              |                                         |
| IV- SIN. RV.PGK |                    | IV     | Clec4n      | 56620     |        |        |         |                                     |                            |                              |                        |                                        |                |                                         |                             |                               |                                        |                                     |                 |                                   |                            |                        |                      |                       |                       |                             |                                     |                                  |                                      |                              |                               |                              |                                         |
| IV- SIN. RV.PGK |                    | IV     | Clybl       | 69634     |        |        |         |                                     |                            |                              |                        |                                        |                |                                         |                             |                               |                                        |                                     |                 |                                   |                            |                        |                      |                       |                       |                             |                                     |                                  |                                      |                              |                               |                              |                                         |
| IV- SIN. RV.PGK |                    | IV     | Cmtm7       | 102545    | 3      |        | x       |                                     |                            |                              |                        |                                        |                |                                         |                             |                               |                                        |                                     |                 |                                   |                            |                        |                      |                       |                       |                             |                                     |                                  |                                      |                              |                               |                              |                                         |
| IV- SIN. RV.PGK |                    | IV     | Crtc3       | 70461     |        |        |         |                                     |                            |                              |                        |                                        |                |                                         |                             |                               |                                        |                                     |                 |                                   |                            |                        |                      |                       |                       |                             |                                     |                                  |                                      |                              |                               |                              |                                         |
| IV- SIN. RV.PGK |                    | IV     | Crtc3       | 70461     |        |        |         |                                     |                            |                              |                        |                                        |                |                                         |                             |                               |                                        |                                     |                 |                                   |                            |                        |                      |                       |                       |                             |                                     |                                  |                                      |                              |                               |                              |                                         |
| IV- SIN. RV.PGK |                    | IV     | Cugbp2      | 14007     |        |        |         |                                     |                            |                              |                        |                                        |                |                                         |                             |                               |                                        |                                     |                 |                                   |                            |                        |                      |                       |                       |                             |                                     |                                  |                                      |                              |                               |                              |                                         |
| IV- SIN. RV.PGK |                    | IV     | Cutl1       | 13047     | 4      |        | x       |                                     |                            |                              |                        |                                        |                |                                         |                             |                               |                                        | x                                   |                 |                                   |                            |                        |                      |                       |                       |                             |                                     | x                                |                                      |                              |                               |                              |                                         |
| IV- SIN. RV.PGK |                    | IV     | D12Ert551e  | 52635     |        |        |         |                                     |                            |                              |                        |                                        |                |                                         |                             |                               |                                        |                                     |                 |                                   |                            |                        |                      |                       |                       |                             |                                     |                                  |                                      |                              |                               |                              |                                         |
| IV- SIN. RV.PGK |                    | IV     | D17H6S56E-3 | 27762     |        |        |         |                                     |                            |                              |                        |                                        |                |                                         |                             |                               |                                        |                                     |                 |                                   |                            |                        |                      |                       |                       |                             |                                     |                                  |                                      |                              |                               |                              |                                         |
| IV- SIN. RV.PGK |                    | IV     | D17Wsu92e   | 224647    |        |        |         |                                     |                            |                              |                        |                                        |                |                                         |                             |                               |                                        |                                     |                 |                                   |                            |                        |                      |                       |                       |                             |                                     |                                  |                                      |                              |                               |                              |                                         |
| IV- SIN. RV.PGK |                    | IV     | Dapp1       | 26377     |        |        |         |                                     |                            |                              |                        |                                        |                |                                         |                             |                               |                                        |                                     |                 |                                   |                            |                        |                      |                       |                       |                             |                                     |                                  |                                      |                              |                               |                              |                                         |
| IV- SIN. RV.PGK |                    | IV     | Dapp1       | 26377     |        |        |         |                                     |                            |                              |                        |                                        |                |                                         |                             |                               |                                        |                                     |                 |                                   |                            |                        |                      |                       |                       |                             |                                     |                                  |                                      |                              |                               |                              |                                         |
| IV- SIN. RV.PGK |                    | IV     | Depdc1b     | 218581    |        |        |         |                                     |                            |                              |                        |                                        |                |                                         |                             |                               |                                        |                                     |                 |                                   |                            |                        |                      |                       |                       |                             |                                     |                                  |                                      |                              | x                             |                              |                                         |
| IV- SIN. RV.PGK |                    | IV     | Dhodh       | 56749     |        |        |         |                                     |                            |                              |                        |                                        |                |                                         |                             |                               |                                        |                                     |                 |                                   |                            |                        |                      |                       |                       |                             |                                     |                                  |                                      |                              |                               |                              |                                         |
| IV- SIN. RV.PGK |                    | IV     | Dtl         | 76843     |        |        |         |                                     |                            |                              |                        |                                        |                |                                         |                             |                               |                                        |                                     |                 |                                   |                            |                        |                      |                       |                       |                             |                                     |                                  |                                      |                              |                               |                              |                                         |
| IV- SIN. RV.PGK |                    | IV     | Dysfip1     | 68701     |        |        |         |                                     |                            |                              |                        |                                        |                |                                         |                             |                               |                                        |                                     |                 |                                   |                            |                        |                      |                       |                       |                             |                                     |                                  |                                      |                              |                               |                              |                                         |
| IV- SIN. RV.PGK |                    | IV     | Fert2       | 320004    |        |        |         |                                     |                            |                              |                        |                                        |                |                                         |                             |                               |                                        |                                     |                 |                                   |                            |                        |                      |                       |                       |                             |                                     |                                  |                                      |                              |                               |                              |                                         |
| IV- SIN. RV.PGK |                    | IV     | Gab2        | 14389     |        |        |         |                                     |                            |                              |                        |                                        |                |                                         |                             |                               |                                        |                                     |                 |                                   |                            |                        |                      |                       |                       |                             |                                     |                                  |                                      |                              |                               |                              |                                         |
| IV- SIN. RV.PGK |                    | IV     | Gcap14      | 72972     |        |        |         |                                     |                            |                              |                        |                                        |                |                                         |                             |                               |                                        |                                     |                 |                                   |                            |                        |                      |                       |                       |                             |                                     |                                  |                                      |                              |                               |                              |                                         |
| IV- SIN. RV.PGK |                    | IV     | Gcg         | 14526     |        |        |         |                                     |                            |                              |                        |                                        |                |                                         |                             |                               |                                        |                                     |                 |                                   |                            |                        |                      |                       |                       |                             |                                     |                                  |                                      |                              |                               |                              |                                         |
| IV- SIN. RV.PGK |                    | IV     | Gfi1b       | 14582     |        |        |         |                                     |                            |                              |                        |                                        |                |                                         |                             |                               |                                        |                                     |                 |                                   |                            |                        |                      |                       |                       |                             |                                     |                                  |                                      |                              |                               |                              |                                         |

| Vector          | primary DNA number | Source | Gene Symbol | Entrez ID | RV cis | SB cis | All cis | BP:intracellular protein transport | BP: chromatin modification | BP:regulation of cell cycle | BP: cell cycle process | BP: protein amino acid phosphorylation | BP:cell cycle | BP: regulation of programmed cell death | BP:regulation of apoptosis | BP:immune system development | BP:hempoietic or lymphoid organ dev. | BP:negative regulation of transcri | BP:hempopotesis | BP:regulation of kinase activity | BP:B cell differentiation | BP:mitotic cell cycle | BP:cell cycle phase | BP:dephosphorylation | MF:helicase activity | MF:protein kinase activity | MF:protein serine-threonine kinase | MF:protein transporter activity | MF:transcription repressor activity | MF:phosphoinositide binding | MF:GTPase activator activity | MF:pyrophosphatase activity | MF:phosphoprotein phosphatase activity |
|-----------------|--------------------|--------|-------------|-----------|--------|--------|---------|------------------------------------|----------------------------|-----------------------------|------------------------|----------------------------------------|---------------|-----------------------------------------|----------------------------|------------------------------|--------------------------------------|------------------------------------|-----------------|----------------------------------|---------------------------|-----------------------|---------------------|----------------------|----------------------|----------------------------|------------------------------------|---------------------------------|-------------------------------------|-----------------------------|------------------------------|-----------------------------|----------------------------------------|
| IV- SIN. RV.PGK |                    | IV     | Gm628       | 268816    |        |        |         |                                    |                            |                             |                        |                                        |               |                                         |                            |                              |                                      |                                    |                 |                                  |                           |                       |                     |                      |                      |                            |                                    |                                 |                                     |                             |                              |                             |                                        |
| IV- SIN. RV.PGK |                    | IV     | Grap2       | 17444     |        |        |         |                                    |                            |                             |                        |                                        |               |                                         |                            |                              |                                      |                                    |                 |                                  |                           |                       |                     |                      |                      |                            |                                    |                                 |                                     |                             |                              |                             |                                        |
| IV- SIN. RV.PGK |                    | IV     | Grb2        | 14784     |        |        |         |                                    |                            |                             |                        |                                        |               |                                         |                            |                              |                                      |                                    |                 |                                  |                           |                       |                     |                      |                      |                            |                                    |                                 |                                     |                             |                              |                             |                                        |
| IV- SIN. RV.PGK |                    | IV     | Haa0        | 107766    |        |        |         |                                    |                            |                             |                        |                                        |               |                                         |                            |                              |                                      |                                    |                 |                                  |                           |                       |                     |                      |                      |                            |                                    |                                 |                                     |                             |                              |                             |                                        |
| IV- SIN. RV.PGK |                    | IV     | Heg1        | 77446     |        |        |         |                                    |                            |                             |                        |                                        |               |                                         |                            |                              |                                      |                                    |                 |                                  |                           |                       |                     |                      |                      |                            |                                    |                                 |                                     |                             |                              |                             |                                        |
| IV- SIN. RV.PGK |                    | IV     | Heg1        | 77446     |        |        |         |                                    |                            |                             |                        |                                        |               |                                         |                            |                              |                                      |                                    |                 |                                  |                           |                       |                     |                      |                      |                            |                                    |                                 |                                     |                             |                              |                             |                                        |
| IV- SIN. RV.PGK |                    | IV     | Hey1        | 15213     |        |        |         |                                    |                            |                             |                        |                                        |               |                                         |                            |                              |                                      |                                    |                 |                                  |                           |                       |                     |                      |                      |                            |                                    |                                 |                                     |                             |                              |                             |                                        |
| IV- SIN. RV.PGK |                    | IV     | Hic2        | 58180     |        |        |         |                                    |                            |                             |                        |                                        |               |                                         |                            |                              |                                      |                                    |                 |                                  |                           |                       |                     |                      |                      |                            |                                    |                                 |                                     |                             |                              |                             |                                        |
| IV- SIN. RV.PGK |                    | IV     | Hod         | 74318     |        |        |         |                                    |                            |                             |                        |                                        |               |                                         |                            |                              |                                      | x                                  |                 |                                  |                           |                       |                     |                      |                      |                            |                                    |                                 | x                                   |                             |                              |                             |                                        |
| IV- SIN. RV.PGK |                    | IV     | Hsp90aa1    | 15519     |        |        |         |                                    |                            |                             |                        |                                        |               |                                         |                            | x                            | x                                    |                                    | x               |                                  |                           |                       |                     |                      |                      |                            |                                    |                                 |                                     |                             |                              |                             |                                        |
| IV- SIN. RV.PGK |                    | IV     | Hspa12b     | 72630     |        |        |         |                                    |                            |                             |                        |                                        |               |                                         |                            |                              |                                      |                                    |                 |                                  |                           |                       |                     |                      |                      |                            |                                    |                                 |                                     |                             |                              |                             |                                        |
| IV- SIN. RV.PGK |                    | IV     | Idh3a       | 67834     |        |        |         |                                    |                            |                             |                        |                                        |               |                                         |                            |                              |                                      |                                    |                 |                                  |                           |                       |                     |                      |                      |                            |                                    |                                 |                                     |                             |                              |                             |                                        |
| IV- SIN. RV.PGK |                    | IV     | Ift57       | 73916     |        |        |         |                                    |                            |                             |                        |                                        |               | x                                       | x                          |                              |                                      |                                    |                 |                                  |                           |                       |                     |                      |                      |                            |                                    |                                 |                                     |                             |                              |                             |                                        |
| IV- SIN. RV.PGK |                    | IV     | Iqgap2      | 544963    |        |        |         |                                    |                            |                             |                        |                                        |               |                                         |                            |                              |                                      |                                    |                 |                                  |                           |                       |                     |                      |                      |                            |                                    |                                 |                                     |                             |                              |                             |                                        |
| IV- SIN. RV.PGK |                    | IV     | Kdr         | 16542     | 8      |        | x       |                                    |                            |                             |                        | x                                      |               |                                         |                            | x                            | x                                    |                                    | x               |                                  |                           |                       |                     |                      |                      | x                          | x                                  |                                 |                                     |                             |                              |                             |                                        |
| IV- SIN. RV.PGK |                    | IV     | Klhl22      | 224023    |        |        |         |                                    |                            |                             |                        |                                        |               |                                         |                            |                              |                                      |                                    |                 |                                  |                           |                       |                     |                      |                      |                            |                                    |                                 |                                     |                             |                              |                             |                                        |
| IV- SIN. RV.PGK |                    | IV     | Lass2       | 76893     |        |        |         |                                    |                            |                             |                        |                                        |               |                                         |                            |                              |                                      |                                    |                 |                                  |                           |                       |                     |                      |                      |                            |                                    |                                 |                                     |                             |                              |                             |                                        |
| IV- SIN. RV.PGK |                    | IV     | Leo1        | 235497    |        |        |         |                                    |                            |                             |                        |                                        |               |                                         |                            |                              |                                      |                                    |                 |                                  |                           |                       |                     |                      |                      |                            |                                    |                                 |                                     |                             |                              |                             |                                        |
| IV- SIN. RV.PGK |                    | IV     | Lnpep       | 240028    | 5      |        | x       |                                    |                            |                             |                        |                                        |               |                                         |                            |                              |                                      |                                    |                 |                                  |                           |                       |                     |                      |                      |                            |                                    |                                 |                                     |                             |                              |                             |                                        |
| IV- SIN. RV.PGK |                    | IV     | LOC634731   | 634731    |        |        |         |                                    |                            |                             |                        |                                        |               |                                         |                            |                              |                                      |                                    |                 |                                  |                           |                       |                     |                      |                      |                            |                                    |                                 |                                     |                             |                              |                             |                                        |
| IV- SIN. RV.PGK |                    | IV     | Lrpprc      | 72416     |        |        |         |                                    |                            |                             |                        |                                        |               |                                         |                            |                              |                                      |                                    |                 |                                  |                           |                       |                     |                      |                      |                            |                                    |                                 |                                     |                             |                              |                             |                                        |
| IV- SIN. RV.PGK |                    | IV     | mmu-mir-142 | 387160    | 8      |        | x       |                                    |                            |                             |                        |                                        |               |                                         |                            |                              |                                      |                                    |                 |                                  |                           |                       |                     |                      |                      |                            |                                    |                                 |                                     |                             |                              |                             |                                        |

| Vector          | primary DNA number | Source | Gene Symbol | Entrez ID | RV cis | SB cis | All cis | BP:intracellular protein transport | BP: chromatin modification | BP:regulation of cell cycle | BP: cell cycle process | BP: protein amino acid phosphorylation | BP:cell cycle | BP: regulation of programmed cell death | BP: regulation of apoptosis | BP: immune system development | BP:hemopoietic or lymphoid organ dev. | BP:negative regulation of transcri | BP:hemopoiesis | BP: regulation of kinase activity | BP: B cell differentiation | BP:mitotic cell cycle | BP:cell cycle phase | BP:dephosphorylation | MF:helicase activity | MF:protein kinase activity | MF:protein serine-threonine kinase | MF:protein transporter activity | MF:transcription repressor activity | MF:phosphoinositide binding | MF:GTPase activator activity | MF:pyrophosphatase activity | MF:phosphoprotein phosphatase activity |
|-----------------|--------------------|--------|-------------|-----------|--------|--------|---------|------------------------------------|----------------------------|-----------------------------|------------------------|----------------------------------------|---------------|-----------------------------------------|-----------------------------|-------------------------------|---------------------------------------|------------------------------------|----------------|-----------------------------------|----------------------------|-----------------------|---------------------|----------------------|----------------------|----------------------------|------------------------------------|---------------------------------|-------------------------------------|-----------------------------|------------------------------|-----------------------------|----------------------------------------|
| IV- SIN. RV.PGK |                    | IV     | mmu-mir-142 | 387160    | 8      |        | x       |                                    |                            |                             |                        |                                        |               |                                         |                             |                               |                                       |                                    |                |                                   |                            |                       |                     |                      |                      |                            |                                    |                                 |                                     |                             |                              |                             |                                        |
| IV- SIN. RV.PGK |                    | IV     | mmu-mir-802 | 791074    |        |        |         |                                    |                            |                             |                        |                                        |               |                                         |                             |                               |                                       |                                    |                |                                   |                            |                       |                     |                      |                      |                            |                                    |                                 |                                     |                             |                              |                             |                                        |
| IV- SIN. RV.PGK |                    | IV     | Mtap6       | 17760     |        |        |         |                                    |                            |                             |                        |                                        |               |                                         |                             |                               |                                       |                                    |                |                                   |                            |                       |                     |                      |                      |                            |                                    |                                 |                                     |                             |                              |                             |                                        |
| IV- SIN. RV.PGK |                    | IV     | Mtvr2       | 17826     |        |        |         |                                    |                            |                             |                        |                                        |               |                                         |                             |                               |                                       |                                    |                |                                   |                            |                       |                     |                      |                      |                            |                                    |                                 |                                     |                             |                              |                             |                                        |
| IV- SIN. RV.PGK |                    | IV     | Myo1d       | 338367    |        |        |         |                                    |                            |                             |                        |                                        |               |                                         |                             |                               |                                       |                                    |                |                                   |                            |                       |                     |                      |                      |                            |                                    |                                 |                                     |                             |                              |                             |                                        |
| IV- SIN. RV.PGK |                    | IV     | Myst4       | 54169     |        |        |         | x                                  |                            |                             |                        |                                        |               |                                         |                             |                               | x                                     |                                    |                |                                   |                            |                       |                     |                      |                      |                            |                                    |                                 | x                                   |                             |                              |                             |                                        |
| IV- SIN. RV.PGK |                    | IV     | Negr1       | 320840    |        |        |         |                                    |                            |                             |                        |                                        |               |                                         |                             |                               |                                       |                                    |                |                                   |                            |                       |                     |                      |                      |                            |                                    |                                 |                                     | x                           |                              |                             |                                        |
| IV- SIN. RV.PGK |                    | IV     | Nek6        | 59126     |        |        |         |                                    | x                          | x                           | x                      | x                                      |               |                                         |                             |                               |                                       |                                    |                |                                   |                            | x                     | x                   |                      |                      | x                          | x                                  |                                 |                                     |                             |                              |                             |                                        |
| IV- SIN. RV.PGK |                    | IV     | Nhs         | 195727    |        |        |         |                                    |                            |                             |                        |                                        |               |                                         |                             |                               |                                       |                                    |                |                                   |                            |                       |                     |                      |                      |                            |                                    |                                 |                                     |                             |                              |                             |                                        |
| IV- SIN. RV.PGK |                    | IV     | Ninj1       | 18081     |        |        |         |                                    |                            |                             |                        |                                        |               |                                         |                             |                               |                                       |                                    |                |                                   |                            |                       |                     |                      |                      |                            |                                    |                                 |                                     |                             |                              |                             |                                        |
| IV- SIN. RV.PGK |                    | IV     | Nt5c2       | 76952     |        |        |         |                                    |                            |                             |                        |                                        |               |                                         |                             |                               |                                       |                                    |                |                                   |                            |                       |                     |                      |                      |                            |                                    |                                 |                                     |                             |                              |                             |                                        |
| IV- SIN. RV.PGK |                    | IV     | Nup35       | 69482     |        |        | x       |                                    |                            |                             |                        |                                        |               |                                         |                             |                               |                                       |                                    |                |                                   |                            |                       |                     |                      |                      |                            |                                    |                                 |                                     |                             |                              |                             |                                        |
| IV- SIN. RV.PGK |                    | IV     | Osbpl8      | 237542    |        |        |         |                                    |                            |                             |                        |                                        |               |                                         |                             |                               |                                       |                                    |                |                                   |                            |                       |                     |                      |                      |                            |                                    |                                 |                                     |                             |                              |                             |                                        |
| IV- SIN. RV.PGK |                    | IV     | Pafah1b1    | 18472     |        |        |         |                                    |                            | x                           |                        |                                        | x             |                                         |                             |                               |                                       |                                    |                |                                   |                            | x                     | x                   |                      |                      |                            |                                    |                                 |                                     |                             |                              |                             |                                        |
| IV- SIN. RV.PGK |                    | IV     | Pan3        | 72587     |        |        |         |                                    |                            |                             |                        | x                                      |               |                                         |                             |                               |                                       |                                    |                |                                   |                            |                       |                     |                      |                      | x                          |                                    |                                 |                                     |                             |                              |                             |                                        |
| IV- SIN. RV.PGK |                    | IV     | Pde4d       | 238871    | 1      |        | x       |                                    |                            |                             |                        |                                        |               |                                         |                             |                               |                                       |                                    |                |                                   |                            |                       |                     |                      |                      |                            |                                    |                                 |                                     |                             |                              |                             |                                        |
| IV- SIN. RV.PGK |                    | IV     | Perp        | 64058     |        |        |         |                                    |                            |                             |                        |                                        |               | x                                       | x                           |                               |                                       |                                    |                |                                   |                            |                       |                     |                      |                      |                            |                                    |                                 |                                     |                             |                              |                             |                                        |
| IV- SIN. RV.PGK |                    | IV     | Pip4k2a     | 18718     |        |        |         |                                    |                            |                             |                        |                                        |               |                                         |                             |                               |                                       |                                    |                |                                   |                            |                       |                     |                      |                      |                            |                                    |                                 |                                     |                             |                              |                             |                                        |
| IV- SIN. RV.PGK |                    | IV     | Pip4k2a     | 18718     |        |        |         |                                    |                            |                             |                        |                                        |               |                                         |                             |                               |                                       |                                    |                |                                   |                            |                       |                     |                      |                      |                            |                                    |                                 |                                     |                             |                              |                             |                                        |
| IV- SIN. RV.PGK |                    | IV     | Polg2       | 50776     |        |        |         |                                    |                            |                             |                        |                                        |               |                                         |                             |                               |                                       |                                    |                |                                   |                            |                       |                     |                      |                      |                            |                                    |                                 |                                     |                             |                              |                             |                                        |
| IV- SIN. RV.PGK |                    | IV     | Prkce       | 18754     |        |        |         |                                    |                            |                             |                        | x                                      |               |                                         |                             |                               |                                       |                                    |                |                                   |                            |                       |                     |                      |                      | x                          | x                                  |                                 |                                     |                             |                              |                             |                                        |
| IV- SIN. RV.PGK |                    | IV     | Rad50       | 19360     |        |        |         |                                    |                            | x                           |                        | x                                      |               |                                         |                             |                               |                                       |                                    |                |                                   |                            |                       | x                   |                      |                      |                            |                                    |                                 |                                     |                             |                              |                             |                                        |

| Vector          | primary DNA number | Source | Gene Symbol | Entrez ID | RV cis | SB cis | All cis | BP: intracellular protein transport | BP: chromatin modification | BP: regulation of cell cycle | BP: cell cycle process | BP: protein amino acid phosphorylation | BP: cell cycle | BP: regulation of programmed cell death | BP: regulation of apoptosis | BP: immune system development | BP: hemopoietic or lymphoid organ dev. | BP: negative regulation of transcri | BP: hemopoiesis | BP: regulation of kinase activity | BP: B cell differentiation | BP: mitotic cell cycle | BP: cell cycle phase | BP: dephosphorylation | MF: helicase activity | MF: protein kinase activity | MF: protein serine-threonine kinase | MF: protein transporter activity | MF: transcription repressor activity | MF: phosphoinositide binding | MF: GTPase activator activity | MF: pyrophosphatase activity | MF: phosphoprotein phosphatase activity |
|-----------------|--------------------|--------|-------------|-----------|--------|--------|---------|-------------------------------------|----------------------------|------------------------------|------------------------|----------------------------------------|----------------|-----------------------------------------|-----------------------------|-------------------------------|----------------------------------------|-------------------------------------|-----------------|-----------------------------------|----------------------------|------------------------|----------------------|-----------------------|-----------------------|-----------------------------|-------------------------------------|----------------------------------|--------------------------------------|------------------------------|-------------------------------|------------------------------|-----------------------------------------|
| IV- SIN. RV.PGK |                    | IV     | Rasal1      | 19415     |        |        |         |                                     |                            |                              |                        |                                        |                |                                         |                             |                               |                                        |                                     |                 |                                   |                            |                        |                      |                       |                       |                             |                                     |                                  |                                      |                              |                               |                              |                                         |
| IV- SIN. RV.PGK |                    | IV     | Rcn3        | 52377     |        |        |         |                                     |                            |                              |                        |                                        |                |                                         |                             |                               |                                        |                                     |                 |                                   |                            |                        |                      |                       |                       |                             |                                     |                                  |                                      |                              |                               |                              |                                         |
| IV- SIN. RV.PGK |                    | IV     | Rps13       | 68052     |        |        |         |                                     |                            |                              |                        |                                        |                |                                         |                             |                               |                                        |                                     |                 |                                   |                            |                        |                      |                       |                       |                             |                                     |                                  |                                      |                              |                               |                              |                                         |
| IV- SIN. RV.PGK |                    | IV     | Satb1       | 20230     | 2      |        | x       |                                     | x                          |                              |                        |                                        |                |                                         |                             |                               |                                        |                                     |                 |                                   |                            |                        |                      |                       |                       |                             |                                     |                                  |                                      |                              |                               |                              |                                         |
| IV- SIN. RV.PGK |                    | IV     | Sept9       | 53860     | 7      |        | x       |                                     |                            |                              |                        |                                        | x              |                                         |                             |                               |                                        |                                     |                 |                                   |                            |                        |                      |                       |                       |                             |                                     |                                  |                                      |                              |                               |                              |                                         |
| IV- SIN. RV.PGK |                    | IV     | Set         | 56086     | 5      |        | x       |                                     |                            |                              |                        |                                        |                |                                         |                             |                               |                                        |                                     |                 |                                   |                            |                        |                      |                       |                       |                             |                                     |                                  |                                      |                              |                               |                              |                                         |
| IV- SIN. RV.PGK |                    | IV     | Sfrs16      | 53609     |        |        |         |                                     |                            |                              |                        |                                        |                |                                         |                             |                               |                                        |                                     |                 |                                   |                            |                        |                      |                       |                       |                             |                                     |                                  |                                      |                              |                               |                              |                                         |
| IV- SIN. RV.PGK |                    | IV     | Sh3kbp1     | 58194     |        |        |         |                                     |                            |                              |                        |                                        |                |                                         |                             |                               |                                        |                                     |                 |                                   |                            |                        |                      |                       |                       |                             |                                     |                                  |                                      |                              |                               |                              |                                         |
| IV- SIN. RV.PGK |                    | IV     | Slc2a3      | 20527     |        |        |         |                                     |                            |                              |                        |                                        |                |                                         |                             |                               |                                        |                                     |                 |                                   |                            |                        |                      |                       |                       |                             |                                     |                                  |                                      |                              |                               |                              |                                         |
| IV- SIN. RV.PGK |                    | IV     | Slc38a1     | 105727    | 2      |        | x       |                                     |                            |                              |                        |                                        |                |                                         |                             |                               |                                        |                                     |                 |                                   |                            |                        |                      |                       |                       |                             |                                     |                                  |                                      |                              |                               |                              |                                         |
| IV- SIN. RV.PGK |                    | IV     | Slc4a7      | 218756    |        |        |         |                                     |                            |                              |                        |                                        |                |                                         |                             |                               |                                        |                                     |                 |                                   |                            |                        |                      |                       |                       |                             |                                     |                                  |                                      |                              |                               |                              |                                         |
| IV- SIN. RV.PGK |                    | IV     | Slc9a1      | 20544     |        |        |         |                                     |                            |                              |                        |                                        |                |                                         |                             |                               |                                        |                                     |                 |                                   |                            |                        |                      |                       |                       |                             |                                     |                                  |                                      |                              |                               |                              |                                         |
| IV- SIN. RV.PGK |                    | IV     | Snx2        | 67804     |        |        |         | x                                   |                            |                              |                        |                                        |                |                                         |                             |                               |                                        |                                     |                 |                                   |                            |                        |                      |                       |                       |                             |                                     | x                                |                                      | x                            |                               |                              |                                         |
| IV- SIN. RV.PGK |                    | IV     | Snx30       | 209131    |        |        |         |                                     |                            |                              |                        |                                        |                |                                         |                             |                               |                                        |                                     |                 |                                   |                            |                        |                      |                       |                       |                             |                                     |                                  |                                      | x                            |                               |                              |                                         |
| IV- SIN. RV.PGK |                    | IV     | Snx5        | 69178     | 2      |        | x       |                                     |                            |                              |                        |                                        |                |                                         |                             |                               |                                        |                                     |                 |                                   |                            |                        |                      |                       |                       |                             |                                     |                                  |                                      | x                            |                               |                              |                                         |
| IV- SIN. RV.PGK |                    | IV     | Sptlc2      | 20773     |        |        |         |                                     |                            |                              |                        |                                        |                |                                         |                             |                               |                                        |                                     |                 |                                   |                            |                        |                      |                       |                       |                             |                                     |                                  |                                      |                              |                               |                              |                                         |
| IV- SIN. RV.PGK |                    | IV     | Sufu        | 24069     |        |        |         | x                                   |                            |                              |                        |                                        |                |                                         |                             |                               |                                        | x                                   |                 |                                   |                            |                        |                      |                       |                       |                             |                                     |                                  |                                      |                              |                               |                              |                                         |
| IV- SIN. RV.PGK |                    | IV     | Suv420h2    | 232811    |        |        |         |                                     | x                          |                              |                        |                                        |                |                                         |                             |                               |                                        |                                     |                 |                                   |                            |                        |                      |                       |                       |                             |                                     |                                  |                                      |                              |                               |                              |                                         |
| IV- SIN. RV.PGK |                    | IV     | Taf6l       | 225895    |        |        |         |                                     |                            |                              |                        |                                        |                |                                         |                             |                               |                                        |                                     |                 |                                   |                            |                        |                      |                       |                       |                             |                                     |                                  |                                      |                              |                               |                              |                                         |
| IV- SIN. RV.PGK |                    | IV     | Tceb3       | 27224     |        |        |         |                                     |                            |                              |                        |                                        |                |                                         |                             |                               |                                        |                                     |                 |                                   |                            |                        |                      |                       |                       |                             |                                     |                                  |                                      |                              |                               |                              |                                         |
| IV- SIN. RV.PGK |                    | IV     | Tiam2       | 24001     |        |        |         |                                     |                            |                              |                        |                                        |                |                                         |                             |                               |                                        |                                     |                 |                                   |                            |                        |                      |                       |                       |                             |                                     |                                  |                                      |                              | x                             |                              |                                         |
| IV- SIN. RV.PGK |                    | IV     | Tmem138     | 72982     |        |        |         |                                     |                            |                              |                        |                                        |                |                                         |                             |                               |                                        |                                     |                 |                                   |                            |                        |                      |                       |                       |                             |                                     |                                  |                                      |                              |                               |                              |                                         |

| Vector           | primary DNA number | Source | Gene Symbol   | Entrez ID | RV cis | SB cis | All cis | BP:intracellular protein transport | BP: chromatin modification | BP:regulation of cell cycle | BP: cell cycle process | BP: protein amino acid phosphorylation | BP:cell cycle | BP: regulation of programmed cell death | BP:regulation of apoptosis | BP:immune system development | BP:hemopoietic or lymphoid organ dev. | BP:negative regulation of transcri | BP:hemopotesis | BP:regulation of kinase activity | BP:B cell differentiation | BP:mitotic cell cycle | BP:cell cycle phase | BP:dephosphorylation | MF:helicase activity | MF:protein kinase activity | MF:protein serine-threonine kinase | MF:protein transporter activity | MF:transcription repressor activity | MF:phosphoinositide binding | MF:GTPase activator activity | MF:pyrophosphatase activity | MF-phosphoprotein phosphatase activity |
|------------------|--------------------|--------|---------------|-----------|--------|--------|---------|------------------------------------|----------------------------|-----------------------------|------------------------|----------------------------------------|---------------|-----------------------------------------|----------------------------|------------------------------|---------------------------------------|------------------------------------|----------------|----------------------------------|---------------------------|-----------------------|---------------------|----------------------|----------------------|----------------------------|------------------------------------|---------------------------------|-------------------------------------|-----------------------------|------------------------------|-----------------------------|----------------------------------------|
| IV- SIN. RV.PGK  |                    | IV     | Tmem48        | 72787     |        |        |         | x                                  |                            |                             |                        |                                        |               |                                         |                            |                              |                                       |                                    |                |                                  |                           |                       |                     |                      |                      |                            |                                    |                                 |                                     |                             |                              |                             |                                        |
| IV- SIN. RV.PGK  |                    | IV     | Top1          | 21969     |        |        |         |                                    |                            |                             |                        |                                        |               |                                         |                            |                              |                                       |                                    |                |                                  |                           |                       |                     |                      |                      |                            |                                    |                                 |                                     |                             |                              |                             |                                        |
| IV- SIN. RV.PGK  |                    | IV     | Traf1         | 22029     | 3      |        | x       |                                    |                            |                             |                        |                                        |               | x                                       | x                          |                              |                                       |                                    |                |                                  |                           |                       |                     |                      |                      |                            |                                    |                                 |                                     |                             |                              |                             |                                        |
| IV- SIN. RV.PGK  |                    | IV     | Wdr5          | 140858    |        |        |         |                                    |                            |                             |                        |                                        |               |                                         |                            |                              |                                       |                                    |                |                                  |                           |                       |                     |                      |                      |                            |                                    |                                 |                                     |                             |                              |                             |                                        |
| IV- SIN. RV.PGK  |                    | IV     | Whsc1 l1      | 234135    |        |        |         |                                    | x                          |                             |                        |                                        |               |                                         |                            |                              |                                       |                                    |                |                                  |                           |                       |                     |                      |                      |                            |                                    |                                 |                                     |                             |                              |                             |                                        |
| IV- SIN. RV.PGK  |                    | IV     | Xylt1         | 233781    |        |        |         |                                    |                            |                             |                        |                                        |               |                                         |                            |                              |                                       |                                    |                |                                  |                           |                       |                     |                      |                      |                            |                                    |                                 |                                     |                             |                              |                             |                                        |
| IV- SIN. RV.PGK  |                    | IV     | Xylt1         | 233781    |        |        |         |                                    |                            |                             |                        |                                        |               |                                         |                            |                              |                                       |                                    |                |                                  |                           |                       |                     |                      |                      |                            |                                    |                                 |                                     |                             |                              |                             |                                        |
| IV- SIN. RV.PGK  |                    | IV     | Zbtb7a        | 16969     |        |        |         |                                    |                            |                             |                        |                                        |               |                                         |                            |                              |                                       | x                                  |                |                                  |                           |                       |                     |                      |                      |                            |                                    | x                               |                                     |                             |                              |                             |                                        |
| IV- SIN. RV.PGK  |                    | IV     | Zfp217        | 228913    | 5      |        | x       |                                    |                            |                             |                        |                                        |               |                                         |                            |                              |                                       |                                    |                |                                  |                           |                       |                     |                      |                      |                            |                                    |                                 |                                     |                             |                              |                             |                                        |
| IV- SIN. RV.PGK  |                    | IV     | Zfp36l2       | 12193     | 4      |        | x       |                                    |                            |                             |                        |                                        |               |                                         |                            |                              |                                       |                                    |                |                                  |                           |                       |                     |                      |                      |                            |                                    |                                 |                                     |                             |                              |                             |                                        |
| IV- SIN. RV.PGK  |                    | IV     | Zfp407        | 240476    |        |        |         |                                    |                            |                             |                        |                                        |               |                                         |                            |                              |                                       |                                    |                |                                  |                           |                       |                     |                      |                      |                            |                                    |                                 |                                     |                             |                              |                             |                                        |
| IV- SIN. RV.PGK  |                    | IV     | Zfp535        | 52712     |        |        |         |                                    |                            |                             |                        |                                        |               |                                         |                            |                              |                                       |                                    |                |                                  |                           |                       |                     |                      |                      |                            |                                    |                                 |                                     |                             |                              |                             |                                        |
| IV- SIN. RV.PGK  |                    | IV     | Zfp62         | 22720     |        |        |         |                                    |                            |                             |                        |                                        |               |                                         |                            |                              |                                       |                                    |                |                                  |                           |                       |                     |                      |                      |                            |                                    |                                 |                                     |                             |                              |                             |                                        |
| IV- SIN. RV.PGK  |                    | IV     | Zmiz1         | 328365    | 9      | 3      | x       |                                    |                            |                             |                        |                                        |               |                                         |                            |                              |                                       |                                    |                |                                  |                           |                       |                     |                      |                      |                            |                                    |                                 |                                     |                             |                              |                             |                                        |
| Tum- SIN. RV.PGK | 290                | BM     | 1810022K09Rik | 69126     |        |        |         |                                    |                            |                             |                        |                                        |               |                                         |                            |                              |                                       |                                    |                |                                  |                           |                       |                     |                      |                      |                            |                                    |                                 |                                     |                             |                              |                             |                                        |
| Tum- SIN. RV.PGK | 218                | BM     | 2210010L05Rik | 98682     |        |        |         |                                    |                            |                             |                        |                                        |               |                                         |                            |                              |                                       |                                    |                |                                  |                           |                       |                     |                      |                      |                            |                                    |                                 |                                     |                             |                              |                             |                                        |
| Tum- SIN. RV.PGK | 221                | BM     | A1bg          | 117586    |        |        |         |                                    |                            |                             |                        |                                        |               |                                         |                            |                              |                                       |                                    |                |                                  |                           |                       |                     |                      |                      |                            |                                    |                                 |                                     |                             |                              |                             |                                        |
| Tum- SIN. RV.PGK | 289                | BM     | Aff4          | 93736     |        |        |         |                                    |                            |                             |                        |                                        |               |                                         |                            |                              |                                       |                                    |                |                                  |                           |                       |                     |                      |                      |                            |                                    |                                 |                                     |                             |                              |                             |                                        |
| Tum- SIN. RV.PGK | 208                | BM     | A1987692      | 331063    |        |        |         |                                    |                            |                             |                        |                                        |               |                                         |                            |                              |                                       |                                    |                |                                  |                           |                       |                     |                      |                      |                            |                                    |                                 |                                     |                             |                              |                             |                                        |
| Tum- SIN. RV.PGK | 344                | BM     | akap6         | 238161    |        |        |         |                                    |                            |                             |                        |                                        |               |                                         |                            |                              |                                       |                                    |                |                                  |                           |                       |                     |                      |                      |                            |                                    |                                 |                                     |                             |                              |                             |                                        |
| Tum- SIN. RV.PGK | 290                | BM     | Ap3m2         | 64933     | 2      |        | x       | x                                  |                            |                             |                        |                                        |               |                                         |                            |                              |                                       |                                    |                |                                  |                           |                       |                     |                      |                      |                            |                                    | x                               |                                     |                             |                              |                             |                                        |
| Tum- SIN. RV.PGK | 344                | BM     | Arsb          | 11881     |        |        |         |                                    |                            |                             |                        |                                        |               |                                         |                            |                              |                                       |                                    |                |                                  |                           |                       |                     |                      |                      |                            |                                    |                                 |                                     |                             |                              |                             |                                        |

| Vector           | primary DNA number | Source | Gene Symbol   | Entrez ID | RV cis | SB cis | All cis | BP:intracellular protein transport | BP: chromatin modification | BP:regulation of cell cycle | BP: cell cycle process | BP: protein amino acid phosphorylation | BP:cell cycle | BP: regulation of programmed cell death | BP:regulation of apoptosis | BP:immune system development | BP:hemoipoetic or lymphoid organ dev. | BP:negative regulation of transcri | BP:hemopoiesis | BP:regulation of kinase activity | BP:B cell differentiation | BP:mitotic cell cycle | BP:cell cycle phase | BP:dephosphorylation | MF:helicase activity | MF:protein kinase activity | MF:protein serine-threonine kinase | MF:protein transporter activity | MF:transcription repressor activity | MF:phosphoinositide binding | MF:GTPase activator activity | MF:pyrophosphatase activity | MF:phosphoprotein phosphatase activity |
|------------------|--------------------|--------|---------------|-----------|--------|--------|---------|------------------------------------|----------------------------|-----------------------------|------------------------|----------------------------------------|---------------|-----------------------------------------|----------------------------|------------------------------|---------------------------------------|------------------------------------|----------------|----------------------------------|---------------------------|-----------------------|---------------------|----------------------|----------------------|----------------------------|------------------------------------|---------------------------------|-------------------------------------|-----------------------------|------------------------------|-----------------------------|----------------------------------------|
| Tum- SIN. RV.PGK | 223                | BM     | C230093N12Rik | 98952     |        |        |         |                                    |                            |                             |                        |                                        |               |                                         |                            |                              |                                       |                                    |                |                                  |                           |                       |                     |                      |                      |                            |                                    |                                 |                                     |                             |                              |                             |                                        |
| Tum- SIN. RV.PGK | 341                | BM     | Cbfa2t2       | 12396     |        |        |         |                                    |                            |                             |                        |                                        |               |                                         |                            |                              |                                       | x                                  |                |                                  |                           |                       |                     |                      |                      |                            |                                    |                                 | x                                   |                             |                              |                             |                                        |
| Tum- SIN. RV.PGK | 288                | BM     | Cln5          | 12728     |        |        |         |                                    |                            |                             |                        |                                        |               |                                         |                            |                              |                                       |                                    |                |                                  |                           |                       |                     |                      |                      |                            |                                    |                                 |                                     |                             |                              |                             |                                        |
| Tum- SIN. RV.PGK | 343                | BM     | Coil          | 12812     |        |        |         |                                    |                            |                             |                        |                                        |               |                                         |                            |                              |                                       |                                    |                |                                  |                           |                       |                     |                      |                      |                            |                                    |                                 |                                     |                             |                              |                             |                                        |
| Tum- SIN. RV.PGK | 289                | BM     | copz1         | 56447     |        |        |         | x                                  |                            |                             |                        |                                        |               |                                         |                            |                              |                                       |                                    |                |                                  |                           |                       |                     |                      |                      |                            |                                    | x                               |                                     |                             |                              |                             |                                        |
| Tum- SIN. RV.PGK | 342                | BM     | Cuedc1        | 103841    | 3      |        | x       |                                    |                            |                             |                        |                                        |               |                                         |                            |                              |                                       |                                    |                |                                  |                           |                       |                     |                      |                      |                            |                                    |                                 |                                     |                             |                              |                             |                                        |
| Tum- SIN. RV.PGK | 208                | BM     | D17Wsu92e     | 224647    |        |        |         |                                    |                            |                             |                        |                                        |               |                                         |                            |                              |                                       |                                    |                |                                  |                           |                       |                     |                      |                      |                            |                                    |                                 |                                     |                             |                              |                             |                                        |
| Tum- SIN. RV.PGK | 293                | BM     | D6Wsu176e     | 27999     |        |        |         |                                    |                            |                             |                        |                                        |               |                                         |                            |                              |                                       |                                    |                |                                  |                           |                       |                     |                      |                      |                            |                                    |                                 |                                     |                             |                              |                             |                                        |
| Tum- SIN. RV.PGK | 289                | BM     | Epb4.114b     | 54357     |        |        |         |                                    |                            |                             |                        |                                        |               |                                         |                            |                              |                                       |                                    |                |                                  |                           |                       |                     |                      |                      |                            |                                    |                                 |                                     |                             |                              |                             |                                        |
| Tum- SIN. RV.PGK | 344                | BM     | Fkbp1         | 56299     |        |        |         |                                    |                            |                             |                        |                                        |               |                                         |                            |                              |                                       |                                    |                |                                  |                           |                       |                     |                      |                      |                            |                                    |                                 |                                     |                             |                              |                             |                                        |
| Tum- SIN. RV.PGK | 343                | BM     | Galnt11       | 231050    |        |        |         |                                    |                            |                             |                        |                                        |               |                                         |                            |                              |                                       |                                    |                |                                  |                           |                       |                     |                      |                      |                            |                                    |                                 |                                     |                             |                              |                             |                                        |
| Tum- SIN. RV.PGK | 223                | BM     | Gent1         | 14537     |        |        |         |                                    |                            |                             |                        |                                        |               |                                         |                            |                              |                                       |                                    |                |                                  |                           |                       |                     |                      |                      |                            |                                    |                                 |                                     |                             |                              |                             |                                        |
| Tum- SIN. RV.PGK | 342                | BM     | Gltscr1       | 243842    |        |        |         |                                    |                            |                             |                        |                                        |               |                                         |                            |                              |                                       |                                    |                |                                  |                           |                       |                     |                      |                      |                            |                                    |                                 |                                     |                             |                              |                             |                                        |
| Tum- SIN. RV.PGK | 225                | BM     | Gm414         | 229389    |        |        |         |                                    |                            |                             |                        |                                        |               |                                         |                            |                              |                                       |                                    |                |                                  |                           |                       |                     |                      |                      |                            |                                    |                                 |                                     |                             |                              |                             |                                        |
| Tum- SIN. RV.PGK | 344                | BM     | Gse1          | 382034    | 2      |        | x       |                                    |                            |                             |                        |                                        |               |                                         |                            |                              |                                       |                                    |                |                                  |                           |                       |                     |                      |                      |                            |                                    |                                 |                                     |                             |                              |                             |                                        |
| Tum- SIN. RV.PGK | 287                | BM     | Haao          | 107766    |        |        |         |                                    |                            |                             |                        |                                        |               |                                         |                            |                              |                                       |                                    |                |                                  |                           |                       |                     |                      |                      |                            |                                    |                                 |                                     |                             |                              |                             |                                        |
| Tum- SIN. RV.PGK | 346                | BM     | Hist2h2aa1    | 15267     |        |        |         |                                    |                            |                             |                        |                                        |               |                                         |                            |                              |                                       |                                    |                |                                  |                           |                       |                     |                      |                      |                            |                                    |                                 |                                     |                             |                              |                             |                                        |
| Tum- SIN. RV.PGK | 239                | BM     | Hyal2         | 15587     |        |        |         |                                    |                            |                             |                        |                                        |               |                                         |                            |                              |                                       |                                    |                |                                  |                           |                       |                     |                      |                      |                            |                                    |                                 |                                     | x                           |                              |                             |                                        |
| Tum- SIN. RV.PGK | 342                | BM     | Lipc          | 15450     |        |        |         |                                    |                            |                             |                        |                                        |               |                                         |                            |                              |                                       |                                    |                |                                  |                           |                       |                     |                      |                      |                            |                                    |                                 |                                     |                             |                              |                             |                                        |
| Tum- SIN. RV.PGK | 288                | BM     | LOC433791     | 433791    |        |        |         |                                    |                            |                             |                        |                                        |               |                                         |                            |                              |                                       |                                    |                |                                  |                           |                       |                     |                      |                      |                            |                                    |                                 |                                     |                             |                              |                             |                                        |
| Tum- SIN. RV.PGK | 211                | BM     | Lrrfip1       | 16978     |        |        |         |                                    |                            |                             |                        |                                        |               |                                         |                            |                              |                                       |                                    |                |                                  |                           |                       |                     |                      |                      |                            |                                    |                                 |                                     |                             |                              |                             |                                        |
| Tum- SIN. RV.PGK | 286                | BM     | Map3k14       | 53859     |        |        |         |                                    |                            |                             |                        | x                                      |               |                                         |                            |                              |                                       |                                    |                |                                  |                           |                       |                     |                      |                      | x                          | x                                  |                                 |                                     |                             |                              |                             |                                        |

| Vector           | primary DNA number | Source | Gene Symbol | Entrez ID | RV cis | SB cis | All cis | BP:intracellular protein transport | BP: chromatin modification | BP: regulation of cell cycle | BP: cell cycle process | BP: protein amino acid phosphorylation | BP: cell cycle | BP: regulation of programmed cell death | BP: regulation of apoptosis | BP: immune system development | BP:hemopoietic or lymphoid organ dev. | BP:negative regulation of transcri | BP:hemopoiesis | BP: regulation of kinase activity | BP: B cell differentiation | BP:mitotic cell cycle | BP: cell cycle phase | BP:dephosphorylation | MF:helicase activity | MF:protein kinase activity | MF:protein serine-threonine kinase | MF:protein transporter activity | MF:transcription repressor activity | MF:phosphoinositide binding | MF:GTPase activator activity | MF:pyrophosphatase activity | MF:phosphoprotein phosphatase activity |
|------------------|--------------------|--------|-------------|-----------|--------|--------|---------|------------------------------------|----------------------------|------------------------------|------------------------|----------------------------------------|----------------|-----------------------------------------|-----------------------------|-------------------------------|---------------------------------------|------------------------------------|----------------|-----------------------------------|----------------------------|-----------------------|----------------------|----------------------|----------------------|----------------------------|------------------------------------|---------------------------------|-------------------------------------|-----------------------------|------------------------------|-----------------------------|----------------------------------------|
| Tum- SIN. RV.PGK | 342                | BM     | mef2d       | 17261     | 6      |        | x       |                                    |                            |                              |                        |                                        |                |                                         |                             |                               |                                       |                                    |                |                                   |                            |                       |                      |                      |                      |                            |                                    |                                 |                                     |                             |                              |                             |                                        |
| Tum- SIN. RV.PGK | 216                | BM     | Mfsd3       | 69572     |        |        |         |                                    |                            |                              |                        |                                        |                |                                         |                             |                               |                                       |                                    |                |                                   |                            |                       |                      |                      |                      |                            |                                    |                                 |                                     |                             |                              |                             |                                        |
| Tum- SIN. RV.PGK | 218                | BM     | Nedd9       | 18003     |        |        |         |                                    |                            |                              | x                      |                                        | x              |                                         |                             |                               |                                       |                                    |                |                                   |                            | x                     | x                    |                      |                      |                            |                                    |                                 |                                     |                             |                              |                             |                                        |
| Tum- SIN. RV.PGK | 342                | BM     | Notch3      | 18131     |        |        |         |                                    |                            |                              |                        |                                        |                |                                         |                             |                               |                                       |                                    |                |                                   |                            |                       |                      |                      |                      |                            |                                    |                                 |                                     |                             |                              |                             |                                        |
| Tum- SIN. RV.PGK | 228                | BM     | Pcbd2       | 72562     |        |        |         |                                    |                            |                              |                        |                                        |                |                                         |                             |                               |                                       |                                    |                |                                   |                            |                       |                      |                      |                      |                            |                                    |                                 |                                     |                             |                              |                             |                                        |
| Tum- SIN. RV.PGK | 346                | BM     | Pofut2      | 80294     |        |        |         |                                    |                            |                              |                        |                                        |                |                                         |                             |                               |                                       |                                    |                |                                   |                            |                       |                      |                      |                      |                            |                                    |                                 |                                     |                             |                              |                             |                                        |
| Tum- SIN. RV.PGK | 286                | BM     | Rap1b       | 215449    | 4      |        | x       |                                    |                            |                              |                        |                                        |                |                                         |                             |                               |                                       |                                    |                |                                   |                            |                       |                      |                      |                      |                            |                                    |                                 |                                     |                             |                              |                             |                                        |
| Tum- SIN. RV.PGK | 221                | BM     | Rbpsuh      | 19664     |        |        |         |                                    |                            |                              |                        |                                        |                |                                         |                             | x                             | x                                     |                                    | x              |                                   | x                          |                       |                      |                      |                      |                            |                                    |                                 |                                     |                             |                              |                             |                                        |
| Tum- SIN. RV.PGK | 344                | BM     | Rhof        | 23912     | 4      |        | x       | x                                  |                            |                              |                        |                                        |                |                                         |                             |                               |                                       |                                    |                |                                   |                            |                       |                      |                      |                      |                            |                                    |                                 |                                     |                             |                              |                             |                                        |
| Tum- SIN. RV.PGK | 221                | BM     | Rras2       | 66922     | 32     |        | x       |                                    |                            |                              |                        |                                        |                |                                         |                             |                               |                                       |                                    |                |                                   |                            |                       |                      |                      |                      |                            |                                    |                                 |                                     |                             |                              | x                           |                                        |
| Tum- SIN. RV.PGK | 208                | BM     | Saps1       | 243819    |        |        |         |                                    |                            |                              |                        |                                        |                |                                         |                             |                               |                                       |                                    |                |                                   |                            |                       |                      |                      |                      |                            |                                    |                                 |                                     |                             |                              |                             |                                        |
| Tum- SIN. RV.PGK | 208                | BM     | Sirt2       | 64383     |        |        |         |                                    | x                          | x                            | x                      |                                        | x              |                                         |                             |                               |                                       | x                                  |                |                                   |                            | x                     | x                    |                      |                      |                            |                                    |                                 |                                     |                             |                              |                             |                                        |
| Tum- SIN. RV.PGK | 293                | BM     | srp9        | 27058     |        |        |         | x                                  |                            |                              |                        |                                        |                |                                         |                             |                               |                                       |                                    |                |                                   |                            |                       |                      |                      |                      |                            |                                    |                                 |                                     |                             |                              |                             |                                        |
| Tum- SIN. RV.PGK | 208                | BM     | Sufu        | 24069     |        |        |         | x                                  |                            |                              |                        |                                        |                |                                         |                             |                               |                                       | x                                  |                |                                   |                            |                       |                      |                      |                      |                            |                                    |                                 |                                     |                             |                              |                             |                                        |
| Tum- SIN. RV.PGK | 346                | BM     | Tbcb        | 66411     |        |        |         |                                    |                            |                              |                        |                                        |                |                                         |                             |                               |                                       |                                    |                |                                   |                            |                       |                      |                      |                      |                            |                                    |                                 |                                     |                             |                              |                             |                                        |
| Tum- SIN. RV.PGK | 228                | BM     | Tmem162     | 76415     |        |        |         |                                    |                            |                              |                        |                                        |                |                                         |                             |                               |                                       |                                    |                |                                   |                            |                       |                      |                      |                      |                            |                                    |                                 |                                     |                             |                              |                             |                                        |
| Tum- SIN. RV.PGK | 225                | BM     | Tparp       | 99929     |        |        |         |                                    |                            |                              |                        |                                        |                |                                         |                             |                               |                                       |                                    |                |                                   |                            |                       |                      |                      |                      |                            |                                    |                                 |                                     |                             |                              |                             |                                        |
| Tum- SIN. RV.PGK | 287                | BM     | Traf2       | 22030     |        |        |         |                                    |                            |                              |                        |                                        |                | x                                       | x                           |                               |                                       |                                    |                |                                   |                            |                       |                      |                      |                      |                            |                                    |                                 |                                     |                             |                              |                             |                                        |
| Tum- SIN. RV.PGK | 228                | BM     | Ythdf2      | 213541    |        |        |         |                                    |                            |                              |                        |                                        |                |                                         |                             |                               |                                       |                                    |                |                                   |                            |                       |                      |                      |                      |                            |                                    |                                 |                                     |                             |                              |                             |                                        |
| Tum- SIN. RV.PGK | 211                | BM     | Zc3h12d     | 237256    |        |        |         |                                    |                            |                              |                        |                                        |                |                                         |                             |                               |                                       |                                    |                |                                   |                            |                       |                      |                      |                      |                            |                                    |                                 |                                     |                             |                              |                             |                                        |
| Tum- SIN. RV.PGK | 225                | BM     | Zdhhc19     | 245308    |        |        |         |                                    |                            |                              |                        |                                        |                |                                         |                             |                               |                                       |                                    |                |                                   |                            |                       |                      |                      |                      |                            |                                    |                                 |                                     |                             |                              |                             |                                        |
| Tum- SIN. RV.PGK | 293                | BM     | Zfp1        | 22640     |        |        |         |                                    |                            |                              |                        |                                        |                |                                         |                             |                               |                                       |                                    |                |                                   |                            |                       |                      |                      |                      |                            |                                    |                                 |                                     |                             |                              |                             |                                        |

| Vector           | primary DNA number | Source | Gene Symbol   | Entrez ID | RV cis | SB cis | All cis | BP:intracellular protein transport | BP: chromatin modification | BP:regulation of cell cycle | BP: cell cycle process | BP: protein amino acid phosphorylation | BP:cell cycle | BP: regulation of programmed cell death | BP:regulation of apoptosis | BP:immune system development | BP:hemopoietic or lymphoid organ dev. | BP:negative regulation of transcri | BP:hemopoiesis | BP:regulation of kinase activity | BP:B cell differentiation | BP:mitotic cell cycle | BP:cell cycle phase | BP:dephosphorylation | MF:hellcase activity | MF:protein kinase activity | MF:protein serine-threonine kinase | MF:protein transporter activity | MF:transcription repressor activity | MF:phosphoinositide binding | MF:GTPase activator activity | MF:pyrophosphatase activity | MF:phosphoprotein phosphatase activity |
|------------------|--------------------|--------|---------------|-----------|--------|--------|---------|------------------------------------|----------------------------|-----------------------------|------------------------|----------------------------------------|---------------|-----------------------------------------|----------------------------|------------------------------|---------------------------------------|------------------------------------|----------------|----------------------------------|---------------------------|-----------------------|---------------------|----------------------|----------------------|----------------------------|------------------------------------|---------------------------------|-------------------------------------|-----------------------------|------------------------------|-----------------------------|----------------------------------------|
| Tum- SIN. RV.PGK | 345                | BM     | Zfp36l2       | 12193     | 4      |        | x       |                                    |                            |                             |                        |                                        |               |                                         |                            |                              |                                       |                                    |                |                                  |                           |                       |                     |                      |                      |                            |                                    |                                 |                                     |                             |                              |                             |                                        |
| Tum- SIN. RV.PGK | 225                | BM     | Zfp39         | 22698     |        |        |         |                                    |                            |                             |                        |                                        |               |                                         |                            |                              |                                       |                                    |                |                                  |                           |                       |                     |                      |                      |                            |                                    |                                 |                                     |                             |                              |                             |                                        |
| Tum-LV.SF.LTR    | 264                | BM     | 0610010B08Rik | 627932    |        |        |         |                                    |                            |                             |                        |                                        |               |                                         |                            |                              |                                       |                                    |                |                                  |                           |                       |                     |                      |                      |                            |                                    |                                 |                                     |                             |                              |                             |                                        |
| Tum-LV.SF.LTR    | 257                | BM     | 1700009N14Rik | 75471     |        |        |         | x                                  |                            |                             | x                      |                                        | x             |                                         |                            |                              |                                       |                                    |                |                                  |                           | x                     | x                   |                      |                      |                            |                                    | x                               |                                     |                             |                              | x                           |                                        |
| Tum-LV.SF.LTR    | 257                | BM     | 5033411D12Rik | 192136    |        |        |         |                                    |                            |                             |                        |                                        |               |                                         |                            |                              |                                       |                                    |                |                                  |                           |                       |                     |                      |                      |                            |                                    |                                 |                                     |                             |                              |                             |                                        |
| Tum-LV.SF.LTR    | 259                | T      | 5830411G16Rik | 78937     |        |        |         |                                    |                            |                             |                        |                                        |               |                                         |                            |                              |                                       |                                    |                |                                  |                           |                       |                     |                      |                      |                            |                                    |                                 |                                     |                             |                              |                             |                                        |
| Tum-LV.SF.LTR    | 261                | BM     | Abca13        | 268379    |        |        |         | x                                  |                            |                             |                        |                                        |               |                                         |                            |                              |                                       |                                    |                |                                  |                           |                       |                     |                      |                      |                            |                                    |                                 |                                     |                             |                              | x                           |                                        |
| Tum-LV.SF.LTR    | 261                | BM     | Agtr1b        | 11608     |        |        |         |                                    |                            |                             |                        |                                        |               | x                                       | x                          |                              |                                       |                                    |                |                                  |                           |                       |                     |                      |                      |                            |                                    |                                 |                                     |                             |                              |                             |                                        |
| Tum-LV.SF.LTR    | 266                | BM     | AK129128      | 218343    |        |        |         |                                    |                            |                             |                        |                                        |               |                                         |                            |                              |                                       |                                    |                |                                  |                           |                       |                     |                      |                      |                            |                                    |                                 |                                     |                             |                              |                             |                                        |
| Tum-LV.SF.LTR    | 271                | BM     | Ankrd11       | 77087     |        |        |         |                                    |                            |                             |                        |                                        |               |                                         |                            |                              |                                       |                                    |                |                                  |                           |                       |                     |                      |                      |                            |                                    |                                 |                                     |                             |                              |                             |                                        |
| Tum-LV.SF.LTR    | 184                | BM     | arhgap6       | 11856     |        |        |         |                                    |                            |                             |                        |                                        |               |                                         |                            |                              |                                       |                                    |                |                                  |                           |                       |                     |                      |                      |                            |                                    |                                 |                                     |                             |                              | x                           |                                        |
| Tum-LV.SF.LTR    | 224                | BM     | Arl4a         | 11861     |        |        |         | x                                  |                            |                             |                        |                                        |               |                                         |                            |                              |                                       |                                    |                |                                  |                           |                       |                     |                      |                      |                            |                                    |                                 |                                     |                             |                              | x                           |                                        |
| Tum-LV.SF.LTR    | 257                | BM     | Atad2b        | 320817    |        |        |         |                                    |                            |                             |                        |                                        |               |                                         |                            |                              |                                       |                                    |                |                                  |                           |                       |                     |                      |                      |                            |                                    |                                 |                                     |                             |                              |                             |                                        |
| Tum-LV.SF.LTR    | 230                | BM     | BC013672      | 234311    |        |        |         |                                    |                            |                             |                        |                                        |               |                                         |                            |                              |                                       |                                    |                |                                  |                           |                       |                     |                      | x                    |                            |                                    |                                 |                                     |                             |                              | x                           |                                        |
| Tum-LV.SF.LTR    | 230                | BM     | BC020002      | 252875    |        |        |         |                                    |                            |                             |                        |                                        |               |                                         |                            |                              |                                       |                                    |                |                                  |                           |                       |                     |                      |                      |                            |                                    |                                 |                                     |                             |                              |                             |                                        |
| Tum-LV.SF.LTR    | 213                | T      | BC053440      | 234344    |        |        |         |                                    |                            |                             |                        |                                        |               |                                         |                            |                              |                                       |                                    |                |                                  |                           |                       |                     |                      |                      |                            |                                    |                                 |                                     |                             |                              |                             |                                        |
| Tum-LV.SF.LTR    | 257                | BM     | bche          | 12038     |        |        |         |                                    |                            |                             |                        |                                        |               |                                         |                            |                              |                                       |                                    |                |                                  |                           |                       |                     |                      |                      |                            |                                    |                                 |                                     |                             |                              |                             |                                        |
| Tum-LV.SF.LTR    | 274                | BM     | bcl6          | 12053     | 5      |        | x       |                                    |                            |                             |                        |                                        |               | x                                       | x                          | x                            | x                                     | x                                  | x              |                                  | x                         |                       |                     |                      |                      |                            |                                    |                                 |                                     |                             |                              |                             |                                        |
| Tum-LV.SF.LTR    | 212                | BM     | Braf          | 109880    |        | 2<br>7 | x       |                                    |                            |                             | x                      |                                        |               |                                         |                            |                              |                                       |                                    |                |                                  |                           |                       |                     |                      |                      | x                          | x                                  |                                 |                                     |                             |                              |                             |                                        |
| Tum-LV.SF.LTR    | 257                | BM     | C030011O14Rik | 215708    |        |        |         |                                    |                            |                             |                        |                                        |               |                                         |                            |                              |                                       |                                    |                |                                  |                           |                       |                     |                      |                      |                            |                                    |                                 |                                     |                             |                              |                             |                                        |
| Tum-LV.SF.LTR    | 266                | BM     | Cadm2         | 239857    |        |        |         |                                    |                            |                             |                        |                                        |               |                                         |                            |                              |                                       |                                    |                |                                  |                           |                       |                     |                      |                      |                            |                                    |                                 |                                     |                             |                              |                             |                                        |

| Vector        | primary DNA number | Source | Gene Symbol | Entrez ID | RV cis | SB cis | All cis | BP:intracellular protein transport | BP: chromatin modification | BP: regulation of cell cycle | BP: cell cycle process | BP: protein amino acid phosphorylation | BP:cell cycle | BP: regulation of programmed cell death | BP: regulation of apoptosis | BP: immune system development | BP:hemopoietic or lymphoid organ dev. | BP:negative regulation of transcri | BP:hemopoiesis | BP: regulation of kinase activity | BP: B cell differentiation | BP:mitotic cell cycle | BP:cell cycle phase | BP:dephosphorylation | MF:helicase activity | MF:protein kinase activity | MF:protein serine-threonine kinase | MF:protein transporter activity | MF:transcription repressor activity | MF:phosphoinositide binding | MF:GTPase activator activity | MF:pyrophosphatase activity | MF:phosphoprotein phosphatase activity |
|---------------|--------------------|--------|-------------|-----------|--------|--------|---------|------------------------------------|----------------------------|------------------------------|------------------------|----------------------------------------|---------------|-----------------------------------------|-----------------------------|-------------------------------|---------------------------------------|------------------------------------|----------------|-----------------------------------|----------------------------|-----------------------|---------------------|----------------------|----------------------|----------------------------|------------------------------------|---------------------------------|-------------------------------------|-----------------------------|------------------------------|-----------------------------|----------------------------------------|
| Tum-LV.SF.LTR | 184                | BM     | Cdc2l6      | 78334     |        |        |         |                                    |                            |                              |                        | x                                      |               |                                         |                             |                               |                                       |                                    |                |                                   |                            |                       |                     |                      |                      | x                          | x                                  |                                 |                                     |                             |                              |                             |                                        |
| Tum-LV.SF.LTR | 173                | BM     | Cenpc1      | 12617     |        |        |         |                                    |                            |                              |                        |                                        |               |                                         |                             |                               |                                       |                                    |                |                                   |                            |                       |                     |                      |                      |                            |                                    |                                 |                                     |                             |                              |                             |                                        |
| Tum-LV.SF.LTR | 270                | BM     | Cntnap2     | 66797     |        |        |         |                                    |                            |                              |                        |                                        |               |                                         |                             |                               |                                       |                                    |                |                                   |                            |                       |                     |                      |                      |                            |                                    |                                 |                                     |                             |                              |                             |                                        |
| Tum-LV.SF.LTR | 173                | SP     | Crb1        | 170788    |        |        |         |                                    |                            |                              |                        |                                        |               |                                         |                             |                               |                                       |                                    |                |                                   |                            |                       |                     |                      |                      |                            |                                    |                                 |                                     |                             |                              |                             |                                        |
| Tum-LV.SF.LTR | 230                | BM     | Csmd3       | 239420    |        | 3      | x       |                                    |                            |                              |                        |                                        |               |                                         |                             |                               |                                       |                                    |                |                                   |                            |                       |                     |                      |                      |                            |                                    |                                 |                                     |                             |                              |                             |                                        |
| Tum-LV.SF.LTR | 277                | BM     | Cyhr1       | 54151     |        |        |         |                                    |                            |                              |                        |                                        |               |                                         |                             |                               |                                       |                                    |                |                                   |                            |                       |                     |                      |                      |                            |                                    |                                 |                                     |                             |                              |                             |                                        |
| Tum-LV.SF.LTR | 179                | SP     | D16Ert472e  | 67102     |        |        |         |                                    |                            |                              |                        |                                        |               |                                         |                             |                               |                                       |                                    |                |                                   |                            |                       |                     |                      |                      |                            |                                    |                                 |                                     |                             |                              |                             |                                        |
| Tum-LV.SF.LTR | 180                | SP     | D53005L1Rik | 338349    |        |        |         |                                    |                            |                              |                        |                                        |               |                                         |                             |                               |                                       |                                    |                |                                   |                            |                       |                     |                      |                      |                            |                                    |                                 |                                     |                             |                              |                             |                                        |
| Tum-LV.SF.LTR | 294                | T      | D6Mm5e      | 110958    | 2      |        | x       |                                    |                            |                              |                        |                                        |               |                                         |                             |                               |                                       |                                    |                |                                   |                            |                       |                     |                      |                      |                            |                                    |                                 |                                     |                             |                              |                             |                                        |
| Tum-LV.SF.LTR | 270                | BM     | Dach2       | 93837     | 2      |        | x       |                                    |                            |                              |                        |                                        |               |                                         |                             |                               |                                       |                                    |                |                                   |                            |                       |                     |                      |                      |                            |                                    |                                 |                                     |                             |                              |                             |                                        |
| Tum-LV.SF.LTR | 264                | BM     | Diap1       | 13367     |        |        |         |                                    |                            |                              |                        |                                        |               |                                         |                             |                               |                                       |                                    |                |                                   |                            |                       |                     |                      |                      |                            |                                    |                                 |                                     |                             |                              |                             |                                        |
| Tum-LV.SF.LTR | 263                | BM     | Dok6        | 623279    |        |        |         |                                    |                            |                              |                        |                                        |               |                                         |                             |                               |                                       |                                    |                |                                   |                            |                       |                     |                      |                      |                            |                                    |                                 |                                     |                             |                              |                             |                                        |
| Tum-LV.SF.LTR | 230                | BM     | E2f5        | 13559     |        |        |         |                                    | x                          | x                            |                        | x                                      |               |                                         |                             |                               |                                       |                                    |                |                                   |                            | x                     | x                   |                      |                      |                            |                                    |                                 |                                     |                             |                              |                             |                                        |
| Tum-LV.SF.LTR | 230                | BM     | Eps15       | 13858     |        | 2      | x       |                                    |                            |                              |                        |                                        |               |                                         |                             |                               |                                       |                                    |                |                                   |                            |                       |                     |                      |                      |                            |                                    |                                 |                                     |                             |                              |                             |                                        |
| Tum-LV.SF.LTR | 230                | BM     | Faf1        | 14084     |        |        |         | x                                  |                            |                              |                        |                                        |               | x                                       | x                           |                               |                                       |                                    |                |                                   |                            |                       |                     |                      |                      |                            |                                    |                                 |                                     |                             |                              |                             |                                        |
| Tum-LV.SF.LTR | 214                | SP     | Fhl2        | 14200     |        |        |         |                                    |                            |                              |                        |                                        |               |                                         |                             |                               |                                       |                                    |                |                                   |                            |                       |                     |                      |                      |                            |                                    |                                 |                                     |                             |                              |                             |                                        |
| Tum-LV.SF.LTR | 272                | BM     | Flrt2       | 399558    |        |        |         |                                    |                            |                              |                        | x                                      |               |                                         |                             |                               |                                       |                                    |                |                                   |                            |                       |                     |                      |                      | x                          | x                                  |                                 |                                     |                             |                              |                             |                                        |
| Tum-LV.SF.LTR | 312                | BM     | Flrt2       | 399558    |        |        |         |                                    |                            |                              |                        | x                                      |               |                                         |                             |                               |                                       |                                    |                |                                   |                            |                       |                     |                      |                      | x                          | x                                  |                                 |                                     |                             |                              |                             |                                        |
| Tum-LV.SF.LTR | 262                | BM     | Fmn12       | 71409     |        |        |         |                                    |                            |                              |                        |                                        |               |                                         |                             |                               |                                       |                                    |                |                                   |                            |                       |                     |                      |                      |                            |                                    |                                 |                                     |                             |                              |                             |                                        |
| Tum-LV.SF.LTR | 271                | BM     | Galnt12     | 78754     |        |        |         |                                    |                            |                              |                        |                                        |               |                                         |                             |                               |                                       |                                    |                |                                   |                            |                       |                     |                      |                      |                            |                                    |                                 |                                     |                             |                              |                             |                                        |
| Tum-LV.SF.LTR | 182                | BM     | Gm421       | 242235    |        |        |         |                                    |                            |                              |                        |                                        |               |                                         |                             |                               |                                       |                                    |                |                                   |                            |                       |                     |                      |                      |                            |                                    |                                 |                                     |                             |                              |                             |                                        |
| Tum-LV.SF.LTR | 274                | BM     | Hrsp12      | 15473     |        |        |         |                                    |                            |                              |                        |                                        |               |                                         |                             |                               |                                       |                                    |                |                                   |                            |                       |                     |                      |                      |                            |                                    |                                 |                                     |                             |                              |                             |                                        |

| Vector        | primary DNA number | Source | Gene Symbol | Entrez ID | RV cis | SB cis | All cis | BP:intracellular protein transport | BP: chromatin modification | BP:regulation of cell cycle | BP: cell cycle process | BP: protein amino acid phosphorylation | BP:cell cycle | BP: regulation of programmed cell death | BP:regulation of apoptosis | BP:immune system development | BP:hempoietic or lymphoid organ dev. | BP:negative regulation of transcri | BP:hempopotesis | BP:regulation of kinase activity | BP:B cell differentiation | BP:mitotic cell cycle | BP:cell cycle phase | BP:dephosphorylation | MF:helicase activity | MF:protein kinase activity | MF:protein serine-threonine kinase | MF:protein transporter activity | MF:transcription repressor activity | MF:phosphoinositide binding | MF:GTPase activator activity | MF:pyrophosphatase activity | MF:phosphoprotein phosphatase activity |
|---------------|--------------------|--------|-------------|-----------|--------|--------|---------|------------------------------------|----------------------------|-----------------------------|------------------------|----------------------------------------|---------------|-----------------------------------------|----------------------------|------------------------------|--------------------------------------|------------------------------------|-----------------|----------------------------------|---------------------------|-----------------------|---------------------|----------------------|----------------------|----------------------------|------------------------------------|---------------------------------|-------------------------------------|-----------------------------|------------------------------|-----------------------------|----------------------------------------|
| Tum-LV.SF.LTR | 180                | SP     | Ibtk        | 108837    |        |        |         |                                    |                            |                             |                        | x                                      |               |                                         |                            |                              |                                      |                                    |                 |                                  |                           |                       |                     |                      |                      |                            |                                    |                                 |                                     |                             |                              |                             |                                        |
| Tum-LV.SF.LTR | 212                | BM     | Ifi204      | 15951     |        |        |         |                                    |                            |                             |                        |                                        |               | x                                       | x                          |                              |                                      |                                    |                 |                                  |                           |                       |                     |                      |                      |                            |                                    |                                 |                                     |                             |                              |                             |                                        |
| Tum-LV.SF.LTR | 257                | BM     | Ifi204      | 15951     |        |        |         |                                    |                            |                             |                        |                                        |               | x                                       | x                          |                              |                                      |                                    |                 |                                  |                           |                       |                     |                      |                      |                            |                                    |                                 |                                     |                             |                              |                             |                                        |
| Tum-LV.SF.LTR | 179                | SP     | Ifna14      | 404549    |        |        |         |                                    |                            |                             |                        |                                        |               |                                         |                            |                              |                                      |                                    |                 |                                  |                           |                       |                     |                      |                      |                            |                                    |                                 |                                     |                             |                              |                             |                                        |
| Tum-LV.SF.LTR | 262                | BM     | Itga2       | 16398     |        |        |         |                                    |                            |                             |                        |                                        |               |                                         |                            |                              |                                      |                                    |                 |                                  |                           |                       |                     |                      |                      |                            |                                    |                                 |                                     |                             |                              |                             |                                        |
| Tum-LV.SF.LTR | 274                | BM     | Itpr1       | 16438     |        |        |         |                                    |                            |                             |                        |                                        |               |                                         |                            |                              |                                      |                                    |                 |                                  |                           |                       |                     |                      |                      |                            |                                    |                                 |                                     |                             |                              |                             |                                        |
| Tum-LV.SF.LTR | 296                | BM     | Jmjd1c      | 108829    |        |        |         | x                                  |                            |                             |                        |                                        |               |                                         |                            |                              |                                      |                                    |                 |                                  |                           |                       |                     |                      |                      |                            |                                    |                                 |                                     |                             |                              |                             |                                        |
| Tum-LV.SF.LTR | 269                | SP     | Kif11       | 16551     |        |        |         |                                    |                            | x                           |                        | x                                      |               |                                         |                            |                              |                                      |                                    |                 |                                  |                           | x                     | x                   |                      |                      |                            |                                    |                                 |                                     |                             |                              |                             |                                        |
| Tum-LV.SF.LTR | 230                | BM     | Klf6        | 23849     |        |        |         |                                    |                            |                             |                        |                                        |               |                                         |                            |                              |                                      |                                    |                 |                                  |                           |                       |                     |                      |                      |                            |                                    |                                 |                                     |                             |                              |                             |                                        |
| Tum-LV.SF.LTR | 230                | BM     | Kpna2       | 16647     |        |        |         | x                                  |                            |                             |                        |                                        |               |                                         |                            |                              |                                      |                                    |                 |                                  |                           |                       |                     |                      |                      |                            |                                    | x                               |                                     |                             |                              |                             |                                        |
| Tum-LV.SF.LTR | 275                | BM     | Lin28b      | 380669    |        |        |         |                                    |                            |                             |                        |                                        |               |                                         |                            |                              |                                      |                                    |                 |                                  |                           |                       |                     |                      |                      |                            |                                    |                                 |                                     |                             |                              |                             |                                        |
| Tum-LV.SF.LTR | 270                | T      | Mdm1        | 17245     |        |        |         |                                    |                            |                             |                        |                                        |               |                                         |                            |                              |                                      |                                    |                 |                                  |                           |                       |                     |                      |                      |                            |                                    |                                 |                                     |                             |                              |                             |                                        |
| Tum-LV.SF.LTR | 229                | BM     | Meis1       | 17268     | 27     |        | x       |                                    |                            |                             |                        |                                        |               |                                         |                            |                              |                                      |                                    |                 |                                  |                           |                       |                     |                      |                      |                            |                                    |                                 |                                     |                             |                              |                             |                                        |
| Tum-LV.SF.LTR | 255                | BM     | Nkx2-3      | 18089     |        |        |         |                                    |                            |                             |                        |                                        |               |                                         |                            | x                            | x                                    |                                    | x               |                                  | x                         |                       |                     |                      |                      |                            |                                    |                                 |                                     |                             |                              |                             |                                        |
| Tum-LV.SF.LTR | 230                | BM     | Nmt2        | 18108     |        |        |         |                                    |                            |                             |                        |                                        |               |                                         |                            |                              |                                      |                                    |                 |                                  |                           |                       |                     |                      |                      |                            |                                    |                                 |                                     |                             |                              |                             |                                        |
| Tum-LV.SF.LTR | 261                | T      | Nsd1        | 18193     |        |        |         |                                    | x                          |                             |                        |                                        |               |                                         |                            |                              |                                      |                                    | x               |                                  |                           |                       |                     |                      |                      |                            |                                    |                                 | x                                   |                             |                              |                             |                                        |
| Tum-LV.SF.LTR | 214                | BM     | Nsd1        | 18193     |        |        |         |                                    | x                          |                             |                        |                                        |               |                                         |                            |                              |                                      |                                    | x               |                                  |                           |                       |                     |                      |                      |                            |                                    |                                 | x                                   |                             |                              |                             |                                        |
| Tum-LV.SF.LTR | 191                | SP     | Nup50       | 18141     |        |        |         |                                    |                            |                             |                        |                                        |               |                                         |                            |                              |                                      |                                    |                 |                                  |                           |                       |                     |                      |                      |                            |                                    |                                 |                                     |                             |                              |                             |                                        |
| Tum-LV.SF.LTR | 184                | BM     | Olfir56     | 18356     |        |        |         |                                    |                            |                             |                        |                                        |               |                                         |                            |                              |                                      |                                    |                 |                                  |                           |                       |                     |                      |                      |                            |                                    |                                 |                                     |                             |                              |                             |                                        |
| Tum-LV.SF.LTR | 270                | BM     | Pam         | 18484     |        |        |         |                                    |                            |                             |                        |                                        |               |                                         |                            |                              |                                      |                                    |                 |                                  |                           |                       |                     |                      |                      |                            |                                    |                                 |                                     |                             |                              |                             |                                        |
| Tum-LV.SF.LTR | 267                | BM     | Pcmtd1      | 319263    |        |        |         |                                    |                            |                             |                        |                                        |               |                                         |                            |                              |                                      |                                    |                 |                                  |                           |                       |                     |                      |                      |                            |                                    |                                 |                                     |                             |                              |                             |                                        |
| Tum-LV.SF.LTR | 230                | BM     | Pde4d       | 238871    | 1      |        | x       |                                    |                            |                             |                        |                                        |               |                                         |                            |                              |                                      |                                    |                 |                                  |                           |                       |                     |                      |                      |                            |                                    |                                 |                                     |                             |                              |                             |                                        |

| Vector        | primary DNA number | Source | Gene Symbol | Entrez ID | RV cis | SB cis | All cis | BP: intracellular protein transport | BP: chromatin modification | BP: regulation of cell cycle | BP: cell cycle process | BP: protein amino acid phosphorylation | BP: cell cycle | BP: regulation of programmed cell death | BP: regulation of apoptosis | BP: immune system development | BP: hemopoietic or lymphoid organ dev. | BP: negative regulation of transcri | BP: hemopoiesis | BP: regulation of kinase activity | BP: B cell differentiation | BP: mitotic cell cycle | BP: cell cycle phase | BP: dephosphorylation | MF: helicase activity | MF: protein kinase activity | MF: protein serine-threonine kinase | MF: protein transporter activity | MF: transcription repressor activity | MF: phosphoinositide binding | MF: GTPase activator activity | MF: pyrophosphatase activity | MF: phosphoprotein phosphatase activity |
|---------------|--------------------|--------|-------------|-----------|--------|--------|---------|-------------------------------------|----------------------------|------------------------------|------------------------|----------------------------------------|----------------|-----------------------------------------|-----------------------------|-------------------------------|----------------------------------------|-------------------------------------|-----------------|-----------------------------------|----------------------------|------------------------|----------------------|-----------------------|-----------------------|-----------------------------|-------------------------------------|----------------------------------|--------------------------------------|------------------------------|-------------------------------|------------------------------|-----------------------------------------|
| Tum-LV.SF.LTR | 262                | T      | Pdgfc       | 54635     |        |        |         |                                     |                            | x                            | x                      | x                                      | x              |                                         |                             |                               |                                        |                                     |                 | x                                 |                            |                        |                      |                       |                       |                             |                                     |                                  |                                      |                              |                               |                              |                                         |
| Tum-LV.SF.LTR | 224                | BM     | Prdm2       | 110593    |        |        |         |                                     |                            |                              |                        |                                        |                |                                         |                             |                               |                                        |                                     |                 |                                   |                            |                        |                      |                       |                       |                             |                                     |                                  |                                      |                              |                               |                              |                                         |
| Tum-LV.SF.LTR | 274                | BM     | Ptprc       | 19264     |        |        |         |                                     |                            | x                            | x                      |                                        | x              | x                                       | x                           | x                             | x                                      |                                     | x               | x                                 | x                          |                        |                      | x                     |                       |                             |                                     |                                  |                                      |                              |                               | x                            |                                         |
| Tum-LV.SF.LTR | 275                | BM     | Rad21       | 19357     |        |        |         |                                     |                            |                              | x                      |                                        | x              |                                         |                             |                               |                                        |                                     |                 |                                   |                            | x                      | x                    |                       |                       |                             |                                     |                                  |                                      |                              |                               |                              |                                         |
| Tum-LV.SF.LTR | 191                | SP     | Rere        | 68703     | 3      |        | x       |                                     | x                          |                              |                        |                                        |                |                                         |                             |                               |                                        |                                     |                 |                                   |                            |                        |                      |                       |                       |                             |                                     |                                  |                                      |                              |                               |                              |                                         |
| Tum-LV.SF.LTR | 264                | BM     | Rgs18       | 64214     |        |        |         |                                     |                            |                              |                        |                                        |                |                                         |                             |                               |                                        |                                     |                 |                                   |                            |                        |                      |                       |                       |                             |                                     |                                  |                                      |                              | x                             |                              |                                         |
| Tum-LV.SF.LTR | 230                | BM     | Rnf38       | 73469     |        |        |         |                                     |                            |                              |                        |                                        |                |                                         |                             |                               |                                        |                                     |                 |                                   |                            |                        |                      |                       |                       |                             |                                     |                                  |                                      |                              |                               |                              |                                         |
| Tum-LV.SF.LTR | 265                | BM     | Rps6ka3     | 110651    |        |        |         |                                     |                            |                              |                        | x                                      |                |                                         |                             |                               |                                        |                                     |                 |                                   |                            |                        |                      |                       |                       | x                           | x                                   |                                  |                                      |                              |                               |                              |                                         |
| Tum-LV.SF.LTR | 176                | BM     | Scfd2       | 212986    |        |        |         |                                     |                            |                              |                        |                                        |                |                                         |                             |                               |                                        |                                     |                 |                                   |                            |                        |                      |                       |                       |                             |                                     |                                  |                                      |                              |                               |                              |                                         |
| Tum-LV.SF.LTR | 213                | BM     | sdhd        | 66925     |        |        |         |                                     |                            |                              |                        |                                        |                |                                         |                             |                               |                                        |                                     |                 |                                   |                            |                        |                      |                       |                       |                             |                                     |                                  |                                      |                              |                               |                              |                                         |
| Tum-LV.SF.LTR | 212                | SP     | Serpinb2    | 18788     |        |        |         |                                     |                            |                              |                        |                                        |                |                                         |                             |                               |                                        |                                     |                 |                                   |                            |                        |                      |                       |                       |                             |                                     |                                  |                                      |                              |                               |                              |                                         |
| Tum-LV.SF.LTR | 274                | BM     | Slc13a1     | 55961     |        |        |         |                                     |                            |                              |                        |                                        |                |                                         |                             |                               |                                        |                                     |                 |                                   |                            |                        |                      |                       |                       |                             |                                     |                                  |                                      |                              |                               |                              |                                         |
| Tum-LV.SF.LTR | 275                | T      | Slc17a6     | 140919    |        |        |         |                                     |                            |                              |                        |                                        |                |                                         |                             |                               |                                        |                                     |                 |                                   |                            |                        |                      |                       |                       |                             |                                     |                                  |                                      |                              |                               |                              |                                         |
| Tum-LV.SF.LTR | 261                | T      | Slc8a1      | 20541     |        |        |         |                                     |                            |                              |                        |                                        |                |                                         |                             |                               |                                        |                                     |                 |                                   |                            |                        |                      |                       |                       |                             |                                     |                                  |                                      |                              |                               |                              |                                         |
| Tum-LV.SF.LTR | 262                | BM     | Smarca2     | 67155     |        |        |         |                                     |                            |                              |                        |                                        |                |                                         |                             |                               |                                        |                                     |                 |                                   |                            |                        |                      |                       | x                     |                             |                                     |                                  |                                      |                              |                               |                              |                                         |
| Tum-LV.SF.LTR | 184                | BM     | Smc3        | 13006     |        |        |         |                                     |                            | x                            |                        | x                                      |                |                                         |                             |                               |                                        |                                     |                 |                                   |                            | x                      | x                    |                       |                       |                             |                                     |                                  |                                      |                              |                               | x                            |                                         |
| Tum-LV.SF.LTR | 255                | BM     | Smg6        | 103677    | 9      |        | x       |                                     |                            |                              |                        |                                        |                |                                         |                             |                               |                                        |                                     |                 |                                   |                            |                        |                      |                       |                       |                             |                                     |                                  |                                      |                              |                               |                              |                                         |
| Tum-LV.SF.LTR | 274                | BM     | Snx16       | 74718     |        |        |         |                                     |                            |                              |                        |                                        |                |                                         |                             |                               |                                        |                                     |                 |                                   |                            |                        |                      |                       |                       |                             |                                     |                                  | x                                    |                              |                               |                              |                                         |
| Tum-LV.SF.LTR | 184                | BM     | Sos1        | 20662     |        |        |         |                                     |                            |                              |                        |                                        |                |                                         |                             |                               |                                        |                                     |                 |                                   |                            |                        |                      |                       |                       |                             |                                     |                                  |                                      |                              |                               |                              |                                         |
| Tum-LV.SF.LTR | 254                | BM     | Ssh2        | 237860    |        |        |         |                                     |                            |                              |                        |                                        |                |                                         |                             |                               |                                        |                                     |                 |                                   |                            |                        | x                    |                       |                       |                             |                                     |                                  |                                      |                              |                               |                              |                                         |
| Tum-LV.SF.LTR | 255                | BM     | Ssr3        | 67437     |        |        |         | x                                   |                            |                              |                        |                                        |                |                                         |                             |                               |                                        |                                     |                 |                                   |                            |                        |                      |                       |                       |                             |                                     |                                  |                                      |                              |                               |                              |                                         |
| Tum-LV.SF.LTR | 274                | BM     | Tcf7l2      | 21416     |        |        |         |                                     |                            |                              |                        |                                        |                |                                         |                             |                               |                                        |                                     |                 |                                   |                            |                        |                      |                       |                       |                             |                                     |                                  |                                      |                              |                               |                              |                                         |

| Vector         | primary DNA number | Source | Gene Symbol   | Entrez ID | RV cis | SB cis | All cis | BP:intracellular protein transport | BP: chromatin modification | BP:regulation of cell cycle | BP: cell cycle process | BP: protein amino acid phosphorylation | BP:cell cycle | BP: regulation of programmed cell death | BP:regulation of apoptosis | BP:immune system development | BP:hempoietic or lymphoid organ dev. | BP:negative regulation of transcri | BP:hempotesis | BP:regulation of kinase activity | BP:B cell differentiation | BP:mitotic cell cycle | BP:cell cycle phase | BP:dephosphorylation | MF:helicase activity | MF:protein kinase activity | MF:protein serine-threonine kinase | MF:protein transporter activity | MF:transcription repressor activity | MF:phosphoinositide binding | MF:GTPase activator activity | MF:pyrophosphatase activity | MF-phosphoprotein phosphatase activity |
|----------------|--------------------|--------|---------------|-----------|--------|--------|---------|------------------------------------|----------------------------|-----------------------------|------------------------|----------------------------------------|---------------|-----------------------------------------|----------------------------|------------------------------|--------------------------------------|------------------------------------|---------------|----------------------------------|---------------------------|-----------------------|---------------------|----------------------|----------------------|----------------------------|------------------------------------|---------------------------------|-------------------------------------|-----------------------------|------------------------------|-----------------------------|----------------------------------------|
| Tum-LV.SF.LTR  | 258                | BM     | Thex1         | 67276     |        |        |         |                                    |                            |                             |                        |                                        |               |                                         |                            |                              |                                      |                                    |               |                                  |                           |                       |                     |                      |                      |                            |                                    |                                 |                                     |                             |                              |                             |                                        |
| Tum-LV.SF.LTR  | 294                | T      | Tmem45a       | 56277     |        |        |         |                                    |                            |                             |                        |                                        |               |                                         |                            |                              |                                      |                                    |               |                                  |                           |                       |                     |                      |                      |                            |                                    |                                 |                                     |                             |                              |                             |                                        |
| Tum-LV.SF.LTR  | 214                | SP     | Tpp2          | 22019     |        |        |         |                                    |                            |                             |                        |                                        |               |                                         |                            |                              |                                      |                                    |               |                                  |                           |                       |                     |                      |                      |                            |                                    |                                 |                                     |                             |                              |                             |                                        |
| Tum-LV.SF.LTR  | 295                | SP     | Trp53bp2      | 209456    |        |        |         |                                    |                            |                             |                        |                                        | x             | x                                       | x                          |                              |                                      |                                    |               |                                  |                           |                       |                     |                      |                      |                            |                                    |                                 |                                     |                             |                              |                             |                                        |
| Tum-LV.SF.LTR  | 255                | BM     | Ttc30a2       | 620631    |        |        |         |                                    |                            |                             |                        |                                        |               |                                         |                            |                              |                                      |                                    |               |                                  |                           |                       |                     |                      |                      |                            |                                    |                                 |                                     |                             |                              |                             |                                        |
| Tum-LV.SF.LTR  | 274                | BM     | Ubl3          | 24109     | 3      |        | x       |                                    |                            |                             |                        |                                        |               |                                         |                            |                              |                                      |                                    |               |                                  |                           |                       |                     |                      |                      |                            |                                    |                                 |                                     |                             |                              |                             |                                        |
| Tum-LV.SF.LTR  | 173                | SP     | Utrn          | 22288     |        |        |         |                                    |                            |                             |                        |                                        |               |                                         |                            |                              |                                      |                                    |               |                                  |                           |                       |                     |                      |                      |                            |                                    |                                 |                                     |                             |                              |                             |                                        |
| Tum-LV.SF.LTR  | 275                | BM     | Vwc2          | 319922    |        |        |         |                                    |                            |                             |                        |                                        |               |                                         |                            |                              |                                      |                                    |               |                                  |                           |                       |                     |                      |                      |                            |                                    |                                 |                                     |                             |                              |                             |                                        |
| Tum-SIN. LV.SF | 198                | BM     | 2010111I01Rik | 72061     |        |        |         |                                    |                            |                             |                        |                                        |               |                                         |                            |                              |                                      |                                    |               |                                  |                           |                       |                     |                      |                      |                            |                                    |                                 |                                     |                             |                              |                             |                                        |
| Tum-SIN. LV.SF | 209                | SP     | 2610002M06Rik | 67028     |        |        |         |                                    |                            |                             |                        |                                        |               |                                         |                            |                              |                                      |                                    |               |                                  |                           |                       |                     |                      |                      |                            |                                    |                                 |                                     |                             |                              |                             |                                        |
| Tum-SIN. LV.SF | 220                | BM     | 4930486L24Rik | 214639    |        |        |         |                                    |                            |                             |                        |                                        |               |                                         |                            |                              |                                      |                                    |               |                                  |                           |                       |                     |                      |                      |                            |                                    |                                 |                                     |                             |                              |                             |                                        |
| Tum-SIN. LV.SF | 174                | BM     | 4933427E13Rik | 71234     |        |        |         |                                    |                            |                             |                        |                                        |               |                                         |                            |                              |                                      |                                    |               |                                  |                           |                       |                     |                      |                      |                            |                                    |                                 |                                     |                             |                              |                             |                                        |
| Tum-SIN. LV.SF | 206                | BM     | 5730453I16Rik | 269061    |        |        |         |                                    |                            |                             |                        |                                        |               |                                         |                            |                              |                                      |                                    |               |                                  |                           |                       |                     |                      |                      |                            |                                    |                                 |                                     |                             |                              |                             |                                        |
| Tum-SIN. LV.SF | 174                | SP     | Abca5         | 217265    |        |        |         |                                    |                            |                             |                        |                                        |               |                                         |                            |                              |                                      |                                    |               |                                  |                           |                       |                     |                      |                      |                            |                                    |                                 |                                     |                             |                              | x                           |                                        |
| Tum-SIN. LV.SF | 186                | BM     | Abce1         | 24015     |        |        |         |                                    |                            |                             |                        |                                        |               |                                         |                            |                              |                                      |                                    |               |                                  |                           |                       |                     |                      |                      |                            |                                    |                                 |                                     |                             |                              | x                           |                                        |
| Tum-SIN. LV.SF | 210                | BM     | AK129128      | 218343    |        |        |         |                                    |                            |                             |                        |                                        |               |                                         |                            |                              |                                      |                                    |               |                                  |                           |                       |                     |                      |                      |                            |                                    |                                 |                                     |                             |                              |                             |                                        |
| Tum-SIN. LV.SF | 194                | BM     | Ankib1        | 70797     |        |        |         |                                    |                            |                             |                        |                                        |               |                                         |                            |                              |                                      |                                    |               |                                  |                           |                       |                     |                      |                      |                            |                                    |                                 |                                     |                             |                              |                             |                                        |
| Tum-SIN. LV.SF | 206                | BM     | Ankrd10       | 102334    |        |        |         |                                    |                            |                             |                        |                                        |               |                                         |                            |                              |                                      |                                    |               |                                  |                           |                       |                     |                      |                      |                            |                                    |                                 |                                     |                             |                              |                             |                                        |
| Tum-SIN. LV.SF | 207                | BM     | Arl6ip2       | 56298     |        |        |         |                                    |                            |                             |                        |                                        |               |                                         |                            |                              |                                      |                                    |               |                                  |                           |                       |                     |                      |                      |                            |                                    |                                 |                                     |                             |                              | x                           |                                        |
| Tum-SIN. LV.SF | 301                | T      | Bbs9          | 319845    |        |        |         |                                    |                            |                             |                        |                                        |               |                                         |                            |                              |                                      |                                    |               |                                  |                           |                       |                     |                      |                      |                            |                                    |                                 |                                     |                             |                              |                             |                                        |
| Tum-SIN. LV.SF | 311                | T      | BC013672      | 234311    |        |        |         |                                    |                            |                             |                        |                                        |               |                                         |                            |                              |                                      |                                    |               |                                  |                           |                       |                     | x                    |                      |                            |                                    |                                 |                                     |                             |                              | x                           |                                        |
| Tum-SIN. LV.SF | 207                | BM     | BC072598      | 71169     |        |        |         |                                    |                            |                             |                        |                                        |               |                                         |                            |                              |                                      |                                    |               |                                  |                           |                       |                     |                      |                      |                            |                                    |                                 |                                     |                             |                              |                             |                                        |

| Vector         | primary DNA number | Source | Gene Symbol   | Entrez ID | RV cis | SB cis | All cis | BP:intracellular protein transport | BP: chromatin modification | BP:regulation of cell cycle | BP: cell cycle process | BP: protein amino acid phosphorylation | BP:cell cycle | BP: regulation of programmed cell death | BP: regulation of apoptosis | BP: immune system development | BP:hemopoietic or lymphoid organ dev. | BP:negative regulation of transcri | BP:hemopoiesis | BP: regulation of kinase activity | BP:B cell differentiation | BP:mitotic cell cycle | BP:cell cycle phase | BP:dephosphorylation | MF:helicase activity | MF:protein kinase activity | MF:protein serine-threonine kinase | MF:protein transporter activity | MF:transcription repressor activity | MF:phosphoinositide binding | MF:GTPase activator activity | MF:pyrophosphatase activity | MF:phosphoprotein phosphatase activity |
|----------------|--------------------|--------|---------------|-----------|--------|--------|---------|------------------------------------|----------------------------|-----------------------------|------------------------|----------------------------------------|---------------|-----------------------------------------|-----------------------------|-------------------------------|---------------------------------------|------------------------------------|----------------|-----------------------------------|---------------------------|-----------------------|---------------------|----------------------|----------------------|----------------------------|------------------------------------|---------------------------------|-------------------------------------|-----------------------------|------------------------------|-----------------------------|----------------------------------------|
| Tum-SIN. LV.SF | 190                | BM     | Brcc3         | 210766    |        |        |         |                                    |                            |                             |                        |                                        |               |                                         |                             |                               |                                       |                                    |                |                                   |                           |                       |                     |                      |                      |                            |                                    |                                 |                                     |                             |                              |                             |                                        |
| Tum-SIN. LV.SF | 207                | BM     | C330019G07Rik | 215476    |        |        |         |                                    |                            |                             |                        |                                        |               |                                         |                             |                               |                                       |                                    |                |                                   |                           |                       |                     |                      |                      |                            |                                    |                                 |                                     |                             |                              |                             |                                        |
| Tum-SIN. LV.SF | 303                | BM     | C6            | 12274     |        |        |         |                                    |                            |                             |                        |                                        |               |                                         |                             |                               |                                       |                                    |                |                                   |                           |                       |                     |                      |                      |                            |                                    |                                 |                                     |                             |                              |                             |                                        |
| Tum-SIN. LV.SF | 206                | BM     | camk2d        | 108058    | 5      |        | x       |                                    |                            |                             | x                      | x                                      | x             |                                         |                             |                               |                                       |                                    |                |                                   |                           | x                     | x                   |                      |                      | x                          | x                                  |                                 |                                     |                             |                              |                             |                                        |
| Tum-SIN. LV.SF | 198                | BM     | CcnH          | 66671     |        |        |         |                                    |                            | x                           | x                      |                                        | x             |                                         |                             |                               |                                       |                                    |                |                                   |                           |                       |                     |                      |                      | x                          | x                                  |                                 |                                     |                             |                              |                             |                                        |
| Tum-SIN. LV.SF | 215                | BM     | Col4a3        | 12828     |        |        |         |                                    |                            |                             |                        |                                        |               |                                         | x                           | x                             |                                       |                                    |                |                                   |                           |                       |                     |                      |                      |                            |                                    |                                 |                                     |                             |                              |                             |                                        |
| Tum-SIN. LV.SF | 302                | BM     | Dhsrx         | 236082    |        |        |         |                                    |                            |                             |                        |                                        |               |                                         |                             |                               |                                       |                                    |                |                                   |                           |                       |                     |                      |                      |                            |                                    |                                 |                                     |                             |                              |                             |                                        |
| Tum-SIN. LV.SF | 174                | SP     | Dhsrx         | 236082    |        |        |         |                                    |                            |                             |                        |                                        |               |                                         |                             |                               |                                       |                                    |                |                                   |                           |                       |                     |                      |                      |                            |                                    |                                 |                                     |                             |                              |                             |                                        |
| Tum-SIN. LV.SF | 207                | T      | Dhx15         | 13204     |        |        |         |                                    |                            |                             |                        |                                        |               |                                         |                             |                               |                                       |                                    |                |                                   |                           |                       |                     |                      |                      | x                          |                                    |                                 |                                     |                             |                              | x                           |                                        |
| Tum-SIN. LV.SF | 174                | BM     | EG209380      | 209380    | 2      |        | x       |                                    |                            |                             |                        |                                        |               |                                         |                             |                               |                                       |                                    |                |                                   |                           |                       |                     |                      |                      |                            |                                    |                                 |                                     |                             |                              |                             |                                        |
| Tum-SIN. LV.SF | 206                | BM     | ErbB4         | 13869     |        |        |         |                                    |                            |                             |                        | x                                      |               |                                         |                             |                               |                                       |                                    |                |                                   |                           |                       |                     |                      |                      |                            | x                                  |                                 |                                     |                             |                              |                             |                                        |
| Tum-SIN. LV.SF | 215                | BM     | Esrrg         | 26381     |        |        |         |                                    |                            |                             |                        |                                        |               |                                         |                             |                               |                                       |                                    |                |                                   |                           |                       |                     |                      |                      |                            |                                    |                                 |                                     |                             |                              |                             |                                        |
| Tum-SIN. LV.SF | 222                | SP     | Eya2          | 14049     |        |        |         |                                    |                            |                             |                        |                                        |               |                                         |                             |                               |                                       |                                    |                |                                   |                           |                       |                     | x                    |                      |                            |                                    |                                 |                                     |                             |                              | x                           |                                        |
| Tum-SIN. LV.SF | 206                | BM     | Fbxl17        | 50758     |        |        |         |                                    |                            |                             |                        |                                        |               |                                         |                             |                               |                                       |                                    |                |                                   |                           |                       |                     |                      |                      |                            |                                    |                                 |                                     |                             |                              |                             |                                        |
| Tum-SIN. LV.SF | 238                | SP     | Gata3         | 14462     |        |        |         |                                    |                            |                             |                        |                                        |               |                                         |                             |                               |                                       |                                    |                |                                   |                           |                       |                     |                      |                      |                            |                                    |                                 |                                     |                             |                              |                             |                                        |
| Tum-SIN. LV.SF | 198                | BM     | Gbe1          | 74185     |        |        |         |                                    |                            |                             |                        |                                        |               |                                         |                             |                               |                                       |                                    |                |                                   |                           |                       |                     |                      |                      |                            |                                    |                                 |                                     |                             |                              |                             |                                        |
| Tum-SIN. LV.SF | 207                | SP     | Gnb1          | 14688     |        |        |         |                                    |                            |                             |                        |                                        |               |                                         |                             |                               |                                       |                                    |                |                                   |                           |                       |                     |                      |                      |                            |                                    |                                 |                                     |                             |                              | x                           |                                        |
| Tum-SIN. LV.SF | 306                | BM     | Grb2          | 14784     |        |        |         |                                    |                            |                             |                        |                                        |               |                                         |                             |                               |                                       |                                    |                |                                   |                           |                       |                     |                      |                      |                            |                                    |                                 |                                     |                             |                              |                             |                                        |
| Tum-SIN. LV.SF | 305                | BM     | Kif5b         | 16573     |        |        |         |                                    |                            |                             |                        |                                        |               |                                         |                             |                               |                                       |                                    |                |                                   |                           |                       |                     |                      |                      |                            |                                    |                                 |                                     |                             |                              |                             |                                        |
| Tum-SIN. LV.SF | 206                | BM     | LOC433479     | 72899     |        |        |         |                                    |                            |                             |                        |                                        |               |                                         |                             |                               |                                       |                                    |                |                                   |                           |                       |                     |                      |                      |                            |                                    |                                 |                                     |                             |                              |                             |                                        |
| Tum-SIN. LV.SF | 220                | BM     | Lrig3         | 320398    |        |        |         |                                    |                            |                             |                        |                                        |               |                                         |                             |                               |                                       |                                    |                |                                   |                           |                       |                     |                      |                      |                            |                                    |                                 |                                     |                             |                              |                             |                                        |
| Tum-SIN. LV.SF | 215                | BM     | Lrrc4c        | 241568    |        |        |         |                                    |                            |                             |                        |                                        |               |                                         |                             |                               |                                       |                                    |                |                                   |                           |                       |                     |                      |                      |                            |                                    |                                 |                                     |                             |                              |                             |                                        |

| Vector         | primary DNA number | Source | Gene Symbol | Entrez ID | RV cis | SB cis | All cis | BP:intracellular protein transport | BP: chromatin modification | BP:regulation of cell cycle | BP: cell cycle process | BP: protein amino acid phosphorylation | BP:cell cycle | BP: regulation of programmed cell death | BP:regulation of apoptosis | BP:immune system development | BP:hemopoietic or lymphoid organ dev. | BP:negative regulation of transcri | BP:hemopoiesis | BP:regulation of kinase activity | BP:B cell differentiation | BP:mitotic cell cycle | BP:cell cycle phase | BP:dephosphorylation | MF:helicase activity | MF:protein kinase activity | MF:protein serine-threonine kinase | MF:protein transporter activity | MF:transcription repressor activity | MF:phosphoinositide binding | MF:GTPase activator activity | MF:pyrophosphatase activity | MF:phosphoprotein phosphatase activity |
|----------------|--------------------|--------|-------------|-----------|--------|--------|---------|------------------------------------|----------------------------|-----------------------------|------------------------|----------------------------------------|---------------|-----------------------------------------|----------------------------|------------------------------|---------------------------------------|------------------------------------|----------------|----------------------------------|---------------------------|-----------------------|---------------------|----------------------|----------------------|----------------------------|------------------------------------|---------------------------------|-------------------------------------|-----------------------------|------------------------------|-----------------------------|----------------------------------------|
| Tum-SIN. LV.SF | 190                | BM     | Mad211      | 56150     |        |        |         |                                    |                            | x                           | x                      |                                        | x             |                                         |                            |                              |                                       |                                    |                |                                  |                           | x                     | x                   |                      |                      |                            |                                    |                                 |                                     |                             |                              |                             |                                        |
| Tum-SIN. LV.SF | 303                | BM     | Mad211      | 56150     |        |        |         |                                    |                            | x                           | x                      |                                        | x             |                                         |                            |                              |                                       |                                    |                |                                  |                           | x                     | x                   |                      |                      |                            |                                    |                                 |                                     |                             |                              |                             |                                        |
| Tum-SIN. LV.SF | 219                | SP     | Maml2       | 270118    |        |        |         |                                    |                            |                             |                        |                                        |               |                                         |                            |                              |                                       |                                    |                |                                  |                           |                       |                     |                      |                      |                            |                                    |                                 |                                     |                             |                              |                             |                                        |
| Tum-SIN. LV.SF | 301                | T      | Mnat1       | 17420     |        |        |         |                                    |                            |                             |                        |                                        | x             |                                         |                            |                              |                                       |                                    |                |                                  |                           |                       |                     |                      |                      |                            |                                    |                                 |                                     |                             |                              |                             |                                        |
| Tum-SIN. LV.SF | 301                | BM     | Mtm1        | 17772     |        |        |         |                                    |                            |                             |                        |                                        |               |                                         |                            |                              |                                       |                                    |                |                                  |                           |                       |                     | x                    |                      |                            |                                    |                                 |                                     |                             |                              | x                           |                                        |
| Tum-SIN. LV.SF | 174                | BM     | Myo9a       | 270163    |        |        |         |                                    |                            |                             |                        |                                        |               |                                         |                            |                              |                                       |                                    |                |                                  |                           |                       |                     |                      |                      |                            |                                    |                                 |                                     |                             |                              |                             |                                        |
| Tum-SIN. LV.SF | 207                | T      | Ncoa7       | 211329    |        |        |         |                                    |                            |                             |                        |                                        |               |                                         |                            |                              |                                       |                                    |                |                                  |                           |                       |                     |                      |                      |                            |                                    |                                 |                                     |                             |                              |                             |                                        |
| Tum-SIN. LV.SF | 309                | BM     | Nhs11       | 215819    |        |        |         |                                    |                            |                             |                        |                                        |               |                                         |                            |                              |                                       |                                    |                |                                  |                           |                       |                     |                      |                      |                            |                                    |                                 |                                     |                             |                              |                             |                                        |
| Tum-SIN. LV.SF | 209                | T      | Osbpl8      | 237542    |        |        |         |                                    |                            |                             |                        |                                        |               |                                         |                            |                              |                                       |                                    |                |                                  |                           |                       |                     |                      |                      |                            |                                    |                                 |                                     |                             |                              |                             |                                        |
| Tum-SIN. LV.SF | 215                | BM     | Phtf2       | 68770     |        |        |         |                                    |                            |                             |                        |                                        |               |                                         |                            |                              |                                       |                                    |                |                                  |                           |                       |                     |                      |                      |                            |                                    |                                 |                                     |                             |                              |                             |                                        |
| Tum-SIN. LV.SF | 207                | BM     | Pja2        | 224938    |        |        |         |                                    |                            |                             |                        |                                        |               |                                         |                            |                              |                                       |                                    |                |                                  |                           |                       |                     |                      |                      |                            |                                    |                                 |                                     |                             |                              |                             |                                        |
| Tum-SIN. LV.SF | 220                | BM     | Pla2g4a     | 18783     |        |        |         |                                    |                            |                             |                        |                                        |               |                                         |                            |                              |                                       |                                    |                |                                  |                           |                       |                     |                      |                      |                            |                                    |                                 |                                     |                             |                              |                             |                                        |
| Tum-SIN. LV.SF | 299                | BM     | Polg        | 18975     |        |        |         |                                    |                            |                             |                        |                                        |               |                                         |                            |                              |                                       |                                    |                |                                  |                           |                       |                     |                      |                      |                            |                                    |                                 |                                     |                             |                              |                             |                                        |
| Tum-SIN. LV.SF | 238                | BM     | Polq        | 77782     |        |        |         |                                    |                            |                             |                        |                                        |               |                                         |                            |                              |                                       |                                    |                |                                  |                           |                       |                     |                      | x                    |                            |                                    |                                 |                                     |                             |                              | x                           |                                        |
| Tum-SIN. LV.SF | 209                | T      | Pscdbp      | 227929    |        |        |         |                                    |                            |                             |                        |                                        |               |                                         |                            |                              |                                       |                                    |                |                                  |                           |                       |                     |                      |                      |                            |                                    |                                 |                                     |                             |                              |                             |                                        |
| Tum-SIN. LV.SF | 174                | BM     | Ptpn2       | 19255     |        |        |         |                                    |                            |                             |                        |                                        |               |                                         |                            |                              |                                       |                                    |                |                                  |                           |                       |                     | x                    |                      |                            |                                    |                                 |                                     |                             |                              |                             | x                                      |
| Tum-SIN. LV.SF | 206                | BM     | Ptprd       | 19266     |        |        |         |                                    |                            |                             |                        |                                        |               |                                         |                            |                              |                                       |                                    |                |                                  |                           |                       |                     | x                    |                      |                            |                                    |                                 |                                     |                             |                              |                             | x                                      |
| Tum-SIN. LV.SF | 220                | BM     | Rab1        | 19324     |        |        |         | x                                  |                            |                             |                        |                                        |               |                                         |                            |                              |                                       |                                    |                |                                  |                           |                       |                     |                      |                      |                            |                                    | x                               |                                     |                             |                              |                             | x                                      |
| Tum-SIN. LV.SF | 210                | BM     | Rab39b      | 67790     |        |        |         | x                                  |                            |                             |                        |                                        |               |                                         |                            |                              |                                       |                                    |                |                                  |                           |                       |                     |                      |                      |                            |                                    | x                               |                                     |                             |                              |                             |                                        |
| Tum-SIN. LV.SF | 174                | BM     | rab9        | 56382     |        |        |         | x                                  |                            |                             |                        |                                        |               |                                         |                            |                              |                                       |                                    |                |                                  |                           |                       |                     |                      |                      |                            |                                    | x                               |                                     |                             |                              |                             | x                                      |
| Tum-SIN. LV.SF | 207                | T      | Ranbp5      | 70572     |        |        |         | x                                  |                            |                             |                        |                                        |               |                                         |                            |                              |                                       |                                    |                |                                  |                           |                       |                     |                      |                      |                            |                                    | x                               |                                     |                             |                              |                             |                                        |
| Tum-SIN. LV.SF | 298                | BM     | Scmh1       | 29871     |        |        |         |                                    |                            |                             |                        |                                        |               |                                         |                            |                              |                                       | x                                  |                |                                  |                           |                       |                     |                      |                      |                            |                                    |                                 | x                                   |                             |                              |                             |                                        |

| Vector         | primary DNA number | Source | Gene Symbol | Entrez ID | RV cis | SB cis | All cis | BP: intracellular protein transport | BP: chromatin modification | BP: regulation of cell cycle | BP: cell cycle process | BP: protein amino acid phosphorylation | BP: cell cycle | BP: regulation of programmed cell death | BP: regulation of apoptosis | BP: immune system development | BP: hemopoietic or lymphoid organ dev. | BP: negative regulation of transcri | BP: hemopotesis | BP: regulation of kinase activity | BP: B cell differentiation | BP: mitotic cell cycle | BP: cell cycle phase | BP: dephosphorylation | MF: helicase activity | MF: protein kinase activity | MF: protein serine-threonine kinase | MF: protein transporter activity | MF: transcription repressor activity | MF: phosphoinositide binding | MF: GTPase activator activity | MF: pyrophosphatase activity | MF: phosphoprotein phosphatase activity |
|----------------|--------------------|--------|-------------|-----------|--------|--------|---------|-------------------------------------|----------------------------|------------------------------|------------------------|----------------------------------------|----------------|-----------------------------------------|-----------------------------|-------------------------------|----------------------------------------|-------------------------------------|-----------------|-----------------------------------|----------------------------|------------------------|----------------------|-----------------------|-----------------------|-----------------------------|-------------------------------------|----------------------------------|--------------------------------------|------------------------------|-------------------------------|------------------------------|-----------------------------------------|
| Tum-SIN. LV.SF | 310                | BM     | Sf3a1       | 67465     |        |        |         |                                     |                            |                              |                        |                                        |                |                                         |                             |                               |                                        |                                     |                 |                                   |                            |                        |                      |                       |                       |                             |                                     |                                  |                                      |                              |                               |                              |                                         |
| Tum-SIN. LV.SF | 210                | SP     | Sh2d4b      | 328381    |        |        |         |                                     |                            |                              |                        |                                        |                |                                         |                             |                               |                                        |                                     |                 |                                   |                            |                        |                      |                       |                       |                             |                                     |                                  |                                      |                              |                               |                              |                                         |
| Tum-SIN. LV.SF | 210                | BM     | Slc2a3      | 20527     |        |        |         |                                     |                            |                              |                        |                                        |                |                                         |                             |                               |                                        |                                     |                 |                                   |                            |                        |                      |                       |                       |                             |                                     |                                  |                                      |                              |                               |                              |                                         |
| Tum-SIN. LV.SF | 237                | BM     | Smarcad1    | 13990     |        |        |         |                                     | x                          |                              |                        |                                        |                |                                         |                             |                               |                                        |                                     |                 |                                   |                            |                        |                      | x                     |                       |                             |                                     |                                  |                                      |                              |                               |                              |                                         |
| Tum-SIN. LV.SF | 220                | BM     | smyd3       | 69726     |        | 3      | x       |                                     | x                          |                              |                        |                                        |                |                                         |                             |                               |                                        |                                     |                 |                                   |                            |                        |                      |                       |                       |                             |                                     |                                  |                                      |                              |                               |                              |                                         |
| Tum-SIN. LV.SF | 236                | BM     | Stim2       | 116873    |        |        |         |                                     |                            |                              |                        |                                        |                |                                         |                             |                               |                                        |                                     |                 |                                   |                            |                        |                      |                       |                       |                             |                                     |                                  |                                      |                              |                               |                              |                                         |
| Tum-SIN. LV.SF | 207                | BM     | Stk11       | 20869     |        |        |         |                                     |                            | x                            | x                      | x                                      | x              |                                         |                             |                               |                                        |                                     |                 |                                   |                            |                        |                      |                       |                       |                             | x                                   | x                                |                                      |                              |                               |                              |                                         |
| Tum-SIN. LV.SF | 215                | BM     | Tdrd3       | 219249    |        |        |         |                                     |                            |                              |                        |                                        |                |                                         |                             |                               |                                        |                                     |                 |                                   |                            |                        |                      |                       |                       |                             |                                     |                                  |                                      |                              |                               |                              |                                         |
| Tum-SIN. LV.SF | 303                | T      | Timm23      | 53600     |        |        |         | x                                   |                            |                              |                        |                                        |                |                                         |                             |                               |                                        |                                     |                 |                                   |                            |                        |                      |                       |                       |                             |                                     |                                  | x                                    |                              |                               |                              |                                         |
| Tum-SIN. LV.SF | 206                | BM     | Tlk1        | 228012    |        |        |         |                                     | x                          |                              |                        | x                                      | x              |                                         |                             |                               |                                        |                                     |                 |                                   |                            |                        |                      |                       |                       |                             | x                                   | x                                |                                      |                              |                               |                              |                                         |
| Tum-SIN. LV.SF | 219                | SP     | Tll1        | 21892     |        |        |         |                                     |                            |                              |                        |                                        |                |                                         |                             |                               |                                        |                                     |                 |                                   |                            |                        |                      |                       |                       |                             |                                     |                                  |                                      |                              |                               |                              |                                         |
| Tum-SIN. LV.SF | 206                | BM     | trib2       | 217410    |        |        |         |                                     |                            |                              |                        | x                                      |                |                                         |                             |                               |                                        |                                     |                 | x                                 |                            |                        |                      |                       |                       |                             | x                                   |                                  |                                      |                              |                               |                              |                                         |
| Tum-SIN. LV.SF | 194                | BM     | Trip12      | 14897     |        |        |         |                                     |                            |                              |                        |                                        |                |                                         |                             |                               |                                        |                                     |                 |                                   |                            |                        |                      |                       |                       |                             |                                     |                                  |                                      |                              |                               |                              |                                         |
| Tum-SIN. LV.SF | 187                | BM     | Trps1       | 83925     |        |        |         |                                     |                            |                              |                        |                                        |                |                                         |                             |                               |                                        | x                                   |                 |                                   |                            |                        |                      |                       |                       |                             |                                     |                                  | x                                    |                              |                               |                              |                                         |
| Tum-SIN. LV.SF | 206                | BM     | Tspan7      | 21912     |        |        |         |                                     |                            |                              |                        |                                        |                |                                         |                             |                               |                                        |                                     |                 |                                   |                            |                        |                      |                       |                       |                             |                                     |                                  |                                      |                              |                               |                              |                                         |
| Tum-SIN. LV.SF | 194                | BM     | Vlrlh14     | 171273    |        |        |         |                                     |                            |                              |                        |                                        |                |                                         |                             |                               |                                        |                                     |                 |                                   |                            |                        |                      |                       |                       |                             |                                     |                                  |                                      |                              |                               |                              |                                         |
| Tum-SIN. LV.SF | 210                | SP     | Zbtb20      | 56490     |        |        |         |                                     |                            |                              |                        |                                        |                |                                         |                             |                               |                                        |                                     |                 |                                   |                            |                        |                      |                       |                       |                             |                                     |                                  |                                      |                              |                               |                              |                                         |
| Tum-SIN. LV.SF | 222                | BM     | Zcchc7      | 319885    |        |        |         |                                     |                            |                              |                        |                                        |                |                                         |                             |                               |                                        |                                     |                 |                                   |                            |                        |                      |                       |                       |                             |                                     |                                  |                                      |                              |                               |                              |                                         |
| Tum-SIN. LV.SF | 238                | BM     | Zfp654      | 72020     |        |        |         |                                     |                            |                              |                        |                                        |                |                                         |                             |                               |                                        |                                     |                 |                                   |                            |                        |                      |                       |                       |                             |                                     |                                  |                                      |                              |                               |                              |                                         |
| Tum-SIN. LV.SF | 222                | BM     | Zfyve16     | 218441    |        |        |         | x                                   |                            |                              |                        |                                        |                |                                         |                             |                               |                                        |                                     |                 |                                   |                            |                        |                      |                       |                       |                             |                                     |                                  | x                                    |                              | x                             |                              |                                         |

**Supplementary Table 4.** CIS genes and overrepresented GO gene classes targeted by LV.SF.LTR, SIN.LV.SF and SIN.RV.PGK integrations *in vitro* and in tumors.

**Vector:** Integrations of LV.SF.LTR, SIN.LV.SF and SIN.RV.PGK *in vitro* have the prefix “IV-”, in tumors “Tum-”.

**Primary DNA number:** Tumor DNA ID number.

**Source:** Tissue used for DNA extraction. IV, *in vitro*; BM, bone marrow; SP, spleen; T, thymus.

**Closest Gene Symbol:** Symbol of the closest gene to the integration site.

**Entrez ID:** Gene Entrez Identification Number

**Retroviral CIS, Sleeping Beauty transposon CIS, All CIS:** genes targeted by LV.SF.LTR, SIN.LV.SF and SIN.RV.PGK integrations that matched CIS genes of RTCGD (<http://rtcgd.abcc.ncifcrf.gov>). The number indicates how many times the gene was hit by independent integrations of previous studies using retroviruses (Retroviral CIS), Sleeping Beauty transposon (SB transposon CIS) or both (All CIS, x highlighted in red).

All remaining columns indicate the genes belonging to GO gene classes (indicated by an x highlighted in red) that were significantly overrepresented by the DAVID-EASE analysis, had a fold increase  $\geq 3$  and were represented by  $\geq 3$  genes in the dataset analyzed. Biological Processes (prefix BP: highlighted in blue) and Molecular Function (prefix MF: highlighted in yellow).

Supplementary Table 5a

| Function            | Dataset    | n        | P-value range | Molecules         |
|---------------------|------------|----------|---------------|-------------------|
| Cancer              | LV.SF.LTR  | In vitro | 14            | 1.05E-03-4.86E-02 |
|                     |            | Tumors   | 35            | 2.37E-04-3.88E-02 |
|                     | SIN.LV.SF  | In vitro | 12            | 3.11E-03-4.35E-02 |
|                     |            | Tumors   | 13            | 4.07E-03-4.78E-02 |
|                     | SIN.RV.PGK | In vitro | 31            | 2.66E-04-3.16E-02 |
|                     |            | Tumors   | 9             | 2.86E-03-4.75E-02 |
| Cell Cycle          | LV.SF.LTR  | In vitro | 10            | 1.05E-03-4.88E-02 |
|                     |            | Tumors   | 18            | 7.58E-05-3.88E-02 |
|                     | SIN.LV.SF  | In vitro | 8             | 4.93E-03-4.35E-02 |
|                     |            | Tumors   | 10            | 4.07E-03-4.78E-02 |
|                     | SIN.RV.PGK | In vitro | 17            | 2.77E-03-3.16E-02 |
|                     |            | Tumors   | 1             | 2.86E-03-1.14E-02 |
| Cell Death          | LV.SF.LTR  | In vitro | 8             | 7.08E-03-4.63E-02 |
|                     |            | Tumors   | 18            | 2.37E-04-3.88E-02 |
|                     | SIN.LV.SF  | In vitro | 10            | 1.8E-03-4.35E-02  |
|                     |            | Tumors   | 18            | 4.07E-03-4.39E-02 |
|                     | SIN.RV.PGK | In vitro | 27            | 3.01E-03-3.16E-02 |
|                     |            | Tumors   | 2             | 1.42E-02-4.48E-02 |
| Molecular Transport | LV.SF.LTR  | In vitro | 7             | 7.08E-03-4.71E-02 |
|                     |            | Tumors   | 13            | 4.93E-03-3.63E-02 |
|                     | SIN.LV.SF  | In vitro | 7             | 2.37E-04-3.4E-02  |
|                     |            | Tumors   | 9             | 4.07E-03-4.77E-02 |
|                     | SIN.RV.PGK | In vitro | 16            | 1.81E-03-3.16E-02 |
|                     |            | Tumors   | 4             | 2.86E-03-3.93E-02 |
| Protein             | LV.SF.LTR  | In vitro | 2             | 3.49E-02-3.49E-02 |

| Function                               | Dataset    | n           | P-value range     | Molecules                                                                                                                                                                                                 |
|----------------------------------------|------------|-------------|-------------------|-----------------------------------------------------------------------------------------------------------------------------------------------------------------------------------------------------------|
| Trafficking                            | SIN.LV.SF  | Tumors 3    | 1.47E-02-2.92E-02 | FAF1, EPS15, KPNA2                                                                                                                                                                                        |
|                                        |            | In vitro 2  | 2.44E-02-3.4E-02  | STXBP5, BCL2                                                                                                                                                                                              |
|                                        |            | Tumors 5    | 2.81E-02-4.24E-02 | RAB1A, TLK1, ERBB4, TIMM23, ZFYVE16                                                                                                                                                                       |
|                                        | SIN.RV.PGK | In vitro 1  | 3.16E-02-3.16E-02 | SATB1                                                                                                                                                                                                     |
|                                        |            | Tumors 2    | 8.54E-03-3.93E-02 | CLCN5, SUFU                                                                                                                                                                                               |
| Post-Translational Modification        | LV.SF.LTR  | In vitro 4  | 3.32E-02-3.84E-02 | CCNT1, PRKCQ, STK38L, ACVR2A                                                                                                                                                                              |
|                                        |            | Tumors 1    | 9.84E-03-1.96E-02 | NMT2                                                                                                                                                                                                      |
|                                        | SIN.LV.SF  | In vitro 3  | 1.8E-03-3.4E-02   | PCAF, MYST4, BCL2                                                                                                                                                                                         |
|                                        |            | Tumors 5    | 4.31E-03-1.62E-02 | PTPRD, PTPN2, ERBB4, MTM1, EYA2                                                                                                                                                                           |
|                                        | SIN.RV.PGK | In vitro 12 | 1.92E-04-2.54E-02 | CCT4, BTK, CCR1, WHSC1L1, CCND2, SUV420H2, MYST4, KDR, SATB1, HSP90AA1, PRKCE, SET                                                                                                                        |
| Cell Signaling                         | LV.SF.LTR  | In vitro 5  | 1.06E-02-3.84E-02 | ATP2B1, STK38L, CACNB2, ACVR2A                                                                                                                                                                            |
|                                        |            | Tumors 7    | 4.93E-03-3.88E-02 | PTPRC, FAF1, KLF6, ITGA2, ITPR1, SLC8A1, PDE4D                                                                                                                                                            |
|                                        | SIN.LV.SF  | In vitro 7  | 4.93E-03-3.4E-02  | UBR5, EXOC2, STXBP5, DIO2, PPP3CA, IRF2, BCL2                                                                                                                                                             |
|                                        |            | Tumors 8    | 1.75E-02-4.34E-02 | GNB1, PTPRD, PSCDBP, TSPAN7, GRB2, COL4A3 (includes EG:1285), ERBB4, RANBP5                                                                                                                               |
|                                        | SIN.RV.PGK | In vitro 10 | 6.55E-03-3.16E-02 | BTK, CCR1, GAB2, GRB2, GRAP2, KDR, GCG, PDE4D, CCR7, NT5C2                                                                                                                                                |
| Cell-To-Cell Signaling and Interaction | LV.SF.LTR  | In vitro 4  | 1.06E-02-2.46E-02 | OPCML, PCDH15, CACNB2                                                                                                                                                                                     |
|                                        |            | Tumors 13   | 1.88E-03-3.88E-02 | BRAF, PTPRC, SMC3, DIAPH1, IFI16, IFNA7, KLF6, ITGA2, UTRN, BCL6, PDGFC, CRB1                                                                                                                             |
|                                        | SIN.LV.SF  | In vitro 9  | 3.11E-03-4.17E-02 | FOXP1, DAB2, EMCN, CYP2J2, EPHA4, ITGB8, SLIT2, VAMP7, BCL2                                                                                                                                               |
|                                        |            | Tumors 6    | 4.07E-03-4.39E-02 | PTPRD, KIF5B, GRB2, ERBB4, GATA3, MNAT1                                                                                                                                                                   |
|                                        | SIN.RV.PGK | In vitro 7  | 6.4E-03-3.16E-02  | CCR1, BTK, PRKCE, PAFAH1B1, GCG, SLC9A1, CCR7                                                                                                                                                             |
| Cellular Growth and Proliferation      | LV.SF.LTR  | In vitro 9  | 2.44E-03-4.86E-02 | GAB2, PRKCQ, SMARCA2, KIF13A, NRG3, RUNX2, FOXG1, ACVR2A, PLAG1                                                                                                                                           |
|                                        |            | Tumors 22   | 2.48E-03-3.88E-02 | EPS15, IFI16, ITGA2, KLF6, RPS6KA3 (includes EG:6197), NKX2-3, MEIS1, ITPR1, BCL6, PDGFC, PDE4D, TPP2, SERPINB2, BRAF, PTPRC, DIAPH1, FHL2, SMARCA2, SOS1, CDC2L6, KIF11                                  |
|                                        | SIN.LV.SF  | In vitro 8  | 4.93E-03-3.88E-02 | DAB2, MEIS1, CYP2J2, ITGB8, SLIT2, IRF2, PPP3CA, BCL2                                                                                                                                                     |
|                                        |            | Tumors 7    | 4.07E-03-4.78E-02 | MAML2, MAD2L1, RAB1A, GRB2, KIF5B, ERBB4                                                                                                                                                                  |
|                                        | SIN.RV.PGK | In vitro 27 | 2.14E-03-3.16E-02 | GAB2, SEPT9, PDE4D, TOP1, RASAL1, SUFU, TCEB3, PRKCE, HEY1, TRAF1, DTL, CCR1, ARID5B, GRB2, BTK, GF11B, HOPX, CCND2, GRAP2, KDR, CLEC2D (includes EG:93694), CDC14A, GCG, PAFAH1B1, ZFP36L2, ACVR2A, CCR7 |
| Hematological Disease                  | LV.SF.LTR  | Tumors 2    | 2.86E-03-3.38E-02 | SIRT2, RBPJ                                                                                                                                                                                               |
|                                        |            | In vitro 4  | 2.44E-03-4.86E-02 | NT5C3, GAB2, NRG3, RUNX2                                                                                                                                                                                  |
|                                        |            | Tumors 15   | 1.13E-03-3.88E-02 | ITGA2, NSD1, MEIS1, ITPR1, BCL6, PDE4D, SERPINB2, BRAF, PTPRC, FAF1, DIAPH1, IFNA7, CDC2L6, RAD21                                                                                                         |

| Function                                             | Dataset    |           | n  | P-value range     | Molecules                                                                                                           |
|------------------------------------------------------|------------|-----------|----|-------------------|---------------------------------------------------------------------------------------------------------------------|
|                                                      | SIN.LV.SF  | In vitro  | 5  | 4.93E-03-4.35E-02 | FOXP1,DAB2,MEIS1,IRF2,BCL2                                                                                          |
|                                                      |            | Tumors 1  |    | 4.39E-02-4.39E-02 | PLA2G4A                                                                                                             |
|                                                      | SIN.RV.PGK | In vitro  | 15 | 4.71E-03-3.16E-02 | CCR1,GAB2,PERP (includes EG:64065),SEPT9,PDE4D,BTK,GFI1B,WHSC1L1,TOP1,CCND2,GRAP2,KDR,SATB1,HSP90AA1,TRAF1          |
|                                                      |            | Tumors 4  |    | 5.7E-03-3.38E-02  | MAP3K14,TRAF2,LIPC,NOTCH3                                                                                           |
| Gene Expression                                      | LV.SF.LTR  | In vitro  | 9  | 3.55E-03-4.98E-02 | CCNT1,GAB2,PRKCQ,RUNX2,SMARCA2,EIF5,FOXP1,ACVR2A,PLAG1                                                              |
|                                                      |            | Tumors 20 |    | 4.93E-03-3.88E-02 | RGS18,AGTR1B,JMJD1C,KPNA2,IFI16,ITGA2,KLF6,NSD1,MEIS1,SLC13A1,BCL6,TP53BP2,HRSP12,FHL2,SMARCA2,SOS1,E2F5,TCF7L2     |
|                                                      | SIN.LV.SF  | In vitro  | 5  | 9.84E-03-4.35E-02 | PCAF,DAB2,BTAF1,IRF2,BCL2                                                                                           |
|                                                      |            | Tumors 12 |    | 1.91E-03-3.86E-02 | GNB1,PLA2G4A,ESRRG,CCNH,CAMK2D,PSCDBP,GRB2,ERBB4,TRPS1,GATA3,MNAT1,EYA2                                             |
|                                                      | SIN.RV.PGK | In vitro  | 22 | 6.4E-03-3.16E-02  | ARID5B,GAB2,ZBTB7A,CRTC3,MYST4,GFI1B,HOPX,CUX1,TAF6L,TOP1,AFF3,CCND2,SUFU,KDR,TCEB3,SATB1,NEK6,AEBP2,PRKCE,GCG,HEY1 |
|                                                      |            | Tumors 13 |    | 2.81E-04-4.75E-02 | MAP3K14,NOTCH3,AFF4,TRAF2,SIRT2,SUFU,MEF2D,LRRFIP1,PCBD2,RBPJ,ZFP36L2,CBFA2T2,NEDD9                                 |
| Immunological Disease                                | LV.SF.LTR  | In vitro  | 1  | 2.46E-02-3.84E-02 | GAB2                                                                                                                |
|                                                      |            | Tumors 7  |    | 2.74E-03-3.88E-02 | PTPRC,DIAPH1,ITGA2,MEIS1,BCL6,KIF11,TPP2                                                                            |
|                                                      | SIN.LV.SF  | In vitro  | 7  | 4.93E-03-4.35E-02 | CFC1,MEIS1,EPHA4,SLIT2,IRF2,PPP3CA,BCL2                                                                             |
|                                                      |            | Tumors 3  |    | 8.12E-03-4.39E-02 | PLA2G4A,COL4A3 (includes EG:1285),C6                                                                                |
|                                                      | SIN.RV.PGK | In vitro  | 9  | 1.41E-03-3.16E-02 | CCR1,BTK,GAB2,BRD2,CCND2,GRAP2,SATB1,PERP (includes EG:64065),TRAF1                                                 |
| Immune Response                                      | LV.SF.LTR  | In vitro  | 2  | 3.55E-03-4.21E-02 | CCNT1,PRKCQ                                                                                                         |
|                                                      |            | Tumors 5  |    | 4.73E-03-3.88E-02 | PTPRC,FHL2,IFNA7,MEIS1,BCL6                                                                                         |
|                                                      | SIN.LV.SF  | In vitro  | 5  | 4.93E-03-4.31E-02 | MEIS1,EPHA4,IRF2,PPP3CA,BCL2                                                                                        |
|                                                      |            | Tumors 6  |    | 8.12E-03-4.57E-02 | PLA2G4A,PTPN2,GRB2,COL4A3 (includes EG:1285),C6,GATA3                                                               |
|                                                      | SIN.RV.PGK | In vitro  | 7  | 1.55E-03-3.16E-02 | CCR1,BTK,GAB2,GRAP2,PRKCE,PAFAH1B1,CCR7                                                                             |
|                                                      |            | Tumors 4  |    | 5.7E-03-4.48E-02  | MAP3K14,TRAF2,GCNT1,NEDD9                                                                                           |
| Immune and Lymphatic System Development and Function | LV.SF.LTR  | In vitro  | 1  | 3.55E-03-3.15E-02 | PRKCQ                                                                                                               |
|                                                      |            | Tumors 10 |    | 4.93E-03-3.88E-02 | PTPRC,DIAPH1,IFI16,IFNA7,MEIS1,NKX2-3,BCL6,PDGFC,PDE4D                                                              |
|                                                      | SIN.LV.SF  | In vitro  | 5  | 1.53E-03-4.35E-02 | FOXP1,MEIS1,EPHA4,IRF2,BCL2                                                                                         |
|                                                      |            | Tumors 3  |    | 8.12E-03-4.78E-02 | PTPN2,C6,GATA3                                                                                                      |
|                                                      | SIN.RV.PGK | In vitro  | 12 | 1.55E-03-3.16E-02 | CCR1,BTK,GFI1B,GAB2,GRAP2,SATB1,KDR,PRKCE,PAFAH1B1,GCG,PDE4D,CCR7                                                   |
|                                                      |            | Tumors 5  |    | 1.7E-02-3.93E-02  | MAP3K14,TRAF2,NOTCH3,RBPJ,NEDD9                                                                                     |

**Supplementary Table 5b**

| Function                                             | LV.SF.LTR   |        | SIN.LV.SF |        | SIN.RV.PGK |        |
|------------------------------------------------------|-------------|--------|-----------|--------|------------|--------|
|                                                      | In vitro    | Tumors | In vitro  | Tumors | In vitro   | Tumors |
| Cancer                                               | 14 35       | 12     | 13        | 31     |            | 9      |
| Cell Cycle                                           | 10          | 18     | 8         | 10     | 17         | 1      |
| Cell Death                                           | 8           | 18 10  | 18        | 27     |            | 2      |
| Molecular Transport                                  | 7           | 13     | 7         | 9      | 16         | 4      |
| Protein Trafficking                                  | 2 3 2 5 1 2 |        |           |        |            |        |
| Post-Translational Modification                      | 4           | 1      | 3         | 5      | 12         | 3      |
| Cell Signaling                                       | 5 7 7 8     |        |           |        | 10         | 5      |
| Cell-To-Cell Signaling and Interaction               | 4           | 13     | 9         | 6      | 7          | 3      |
| Cellular Growth and Proliferation                    | 9           | 22     | 8         | 7      | 27         | 2      |
| Hematological Disease                                | 4           | 15     | 5         | 1      | 15         | 4      |
| Gene Expression                                      | 9 20        |        | 5 12      |        | 22         | 13     |
| Immunological Disease                                | 1           | 7      | 7         | 3      | 9          | 1      |
| Immune Response                                      | 2 5         | 5      | 6         | 7      | 4          |        |
| Immune and Lymphatic System Development and Function | 1           | 10     | 5         | 3      | 12         | 5      |

**Supplementary Table 5:** Ingenuity Pathways Analysis (IPA) overrepresentation results for LV.SF.LTR, SIN.LV.SF and SIN.RV.PGK datasets *in vitro* and in tumors.

**a)** IPA Overrepresented molecular pathways (Function) obtained from the six datasets (Dataset). The number of occurrences is given (n). Significance of each overrepresented pathway is provided as a range of significant p values (p-value range). Some genes targeted by two independent integrations are indicated in red. Targeted genes belonging to each pathway are listed (Molecules). **b)** Number of occurrences in each dataset of the above mentioned functional classes.

**Supplementary Table 6**

| ID         | Gene Name       | Int. Type | Chr | Dist to TSS | ORI LTR gene | Function/ CIS         | Tiss. | Average fold increase $\pm$ SD |   |                  |    | Mann Whitney |
|------------|-----------------|-----------|-----|-------------|--------------|-----------------------|-------|--------------------------------|---|------------------|----|--------------|
|            |                 |           |     |             |              |                       |       | INT                            | n | NO INT           | n  |              |
| 212        | <i>Braf</i>     | I         | 6   | 78135       | +            | Cancer                | BM    | 0.91                           | 1 | $0.88 \pm 0.31$  | 3  |              |
| 214        | <i>Nsd1</i>     | I         | 13  | 48896       | -            | Cancer                | BM    | 0.48                           | 1 | $0.72 \pm 0.27$  | 3  |              |
| 271        |                 | I         |     | 51269       | +            |                       |       | 0.41                           | 1 | $0.86 \pm 0.19$  | 2  |              |
| 230        | <i>Faf1</i>     | I         | 4   | 116681      | -            | Apoptosis             | BM    | 0.88                           | 1 | 1                | 1  |              |
|            | <i>E2f5</i>     | I         | 3   | 13952       | +            | Cell Cycle            | BM    | 0.71                           | 1 | 1                | 1  |              |
|            | <i>Eps15</i>    | I         | 4   | 24194       | +            | Cancer                | BM    | $5.44 \pm 1.99$                | 3 | $1.56 \pm 0.33$  | 11 | 0,0128       |
|            |                 |           |     |             |              |                       | SP    | $1.23 \pm 1.02$                | 3 | $1.11 \pm 0.29$  | 12 |              |
|            | <i>Pde4d</i>    | I         | 13  | 348218      | -            | CIS/Cancer            | BM    | $0.05 \pm 0.03$                | 3 | $0.67 \pm 0.29$  | 11 | 0,0293       |
|            |                 |           |     |             |              |                       | SP    | $0.37 \pm 0.42$                | 3 | $1.57 \pm 0.64$  | 12 |              |
|            | <i>Rnf38</i>    | I         | 4   | 34336       | -            | Metal ion binding     | BM    | $1.27 \pm 0.24$                | 3 | $0.95 \pm 0.29$  | 11 |              |
|            |                 |           |     |             |              |                       | SP    | $1.18 \pm 0.81$                | 3 | $1.42 \pm 0.38$  | 12 |              |
| 182<br>184 | <i>Arhgap6</i>  | I         | X   | 406467      | -            | Signaling             | BM    | $13.77 \pm 13.04$              | 5 | $1.62 \pm 0.99$  | 9  | 0,019        |
|            |                 |           |     |             |              |                       | SP    | $1.72 \pm 1.64$                | 6 | $1.19 \pm 0.91$  | 12 |              |
|            | <i>Cdc21b</i>   | I         | 10  | 67333       | +            | Cell cycle/ Apoptosis | SP    | $2.00 \pm 0.49$                | 6 | $1.52 \pm 0.53$  | 12 |              |
|            | <i>Cdk14</i>    | D         | 17  | -128158     | -            | Kinase                | SP    | $1.28 \pm 0.69$                | 6 | $0.97 \pm 0.54$  | 11 |              |
|            |                 |           |     |             |              |                       |       |                                |   |                  |    |              |
|            | <i>Sos1</i>     | I         | 17  | 44777       | -            | Cancer                | BM    | $6.30 \pm 3.79$                | 5 | $1.31 \pm 0.27$  | 9  | 0,001        |
|            |                 |           |     |             |              |                       | SP    | $5.23 \pm 3.25$                | 6 | $1.71 \pm 0.69$  | 12 |              |
|            | <i>Gm941</i>    | D         | 17  | 88136       | -            | Signaling             | SP    | $3.13 \pm 3.08$                | 2 | $8.64 \pm 10.81$ | 2  |              |
|            | <i>Ifi47</i>    | U         | 11  | -22321      | +            | CIS                   | SP    | $2.42 \pm 1.60$                | 6 | $1.27 \pm 0.57$  | 12 | 0,0218       |
|            | <i>Orf56</i>    | I         | 11  | 13993       | +            | CIS                   | SP    | $9.61 \pm 11.68$               | 2 | $9.90 \pm 12.58$ | 2  |              |
|            | <i>Tgtp</i>     | U         | 11  | -530        | -            | GTPase                | BM    | $24.69 \pm 3.11$               | 5 | $0.78 \pm 0.49$  | 9  | 0,001        |
|            |                 |           |     |             |              |                       | SP    | $9.49 \pm 5.44$                | 6 | $1.02 \pm 0.58$  | 12 |              |
|            | <i>EG432555</i> | U         | 11  | 13492       | -            | Hydrolase             | SP    | $6.49 \pm 6.46$                | 2 | $6.80 \pm 8.21$  | 2  |              |

**Supplementary Table 6:** Gene expression analysis on a selected number of genes targeted or near LV.SF.LTR integrations in different tumors. Analysis was performed by Q-PCR using the  $\Delta\Delta C_t$  method corrected for the amplification efficiency of each Taqman probe. The expression level of each tested gene was normalized to the expression of the endogenous control *Hprt*, and is presented as fold change relative to phenotype-matched tumor samples obtained from the mock-transduced groups. The relative expression level for each gene was determined by the qBase

software. The amplification efficiency of each Taqman system was calculated by the Real-time PCR Miner software (available on line: <http://www.miner.ewindup.info>). See Methods for details.

In columns are indicated:

**ID:** Mouse DNA Identifier

**Day:** age of transplanted cells at the time of death

**Phen:** Tumor phenotype defined by histopathology and FACS analysis. MY: myeloid; LY: lymphoid

**Gene Name:** gene symbol of genes tested for expression. The genomic region surrounding two integration sites are represented below (a,b,)

**Int. Type:** intragenic, between TSS and cDNA end (I); upstream the TSS (U); downstream the gene end (D)

**Dist to TSS:** distances between TSS and LTR end

**ORI LTR gene:** orientation of LTR with respect to the direction of transcription of the targeted gene. Opposite (-); Same (+).

**Chr:** chromosome number

**Tiss.:** tissue on which the expression was measured. Bone marrow (BM); spleen (SP).

**Average fold increase  $\pm$  SD:** fold change in expression levels of tumor samples with or without the integration (INT and NO INT respectively) and relative to a phenotype-matched tumor from mock transduced control  $\pm$  Standard Deviation (SD). n= number of biological replicates with or without the integration.

**Mann-Whitney:** p-value calculated by Mann-Whitney test by comparing the expression levels of the selected gene in the group of mice that harbor the vector integration against controls.

**Supplemental Methods**

**A)** QPCR oligonucleotide and probe sequences used for vector copy number quantification and measurement of the engraftment levels using genomic DNA as template

Murine Genomic DNA oligonucleotides and probes

Primers and probe have been designed on the murine  $\beta$ -actin gene.

|                        |    |                                |    |
|------------------------|----|--------------------------------|----|
| $\beta$ -act. Forward: | 5' | AGA GGG AAA TCG TGC GTG AC     | 3' |
| $\beta$ -act. Reverse: | 5' | CAA TAG TGA TGA CCT GGC CGT    | 3' |
| $\beta$ -act. Probe:   | 5' | CAC TGC CGC ATC CTC TTC CTC CC | 3' |

GFP oligonucleotides and probes

Primers and probe have been designed on the GFP cDNA sequence.

|              |    |                        |    |
|--------------|----|------------------------|----|
| GFP Forward: | 5' | CAG CTC GCC GAC CAC TA | 3' |
| GFP Reverse: | 5' | GGG CCG TCG CCG AT     | 3' |
| GFP Probe:   | 5' | CCA GCA GAA CAC CCC C  | 3' |

NEO oligonucleotides and probes

Primers and probe have been designed on the neomycin resistance gene.

|              |    |                           |    |
|--------------|----|---------------------------|----|
| NEO Forward: | 5' | CGG TGC CCT GAA TGA ACT G | 3' |
| NEO Reverse: | 5' | CAC AGC TGC GCA AGG AA    | 3' |
| NEO Probe:   | 5' | CAG CGC GGC TAT CGT       | 3' |

**B)** Gene expression assay identification code from Applied Biosystems (Assay ID ) and nucleotide sequence of the probe(Probe Sequence 5' to 3') used for each tested gene (gene symbol)

| Assay ID      | Probe Sequence 5' to 3'    | Gene Symbol   |
|---------------|----------------------------|---------------|
| Mm00492605_m1 | TTCTTGATCTGAGCTTCCCTGGTA   | Ifi47         |
| Mm00446968_m1 | GGTTAAGGTTGCAAGCTTGCTGGTG  | Hprt1         |
| Mm00446953_m1 | CCGCTACGGGAGTCGGGCCAGTCT   | Gusb          |
| Mm00441941_m1 | TTCTCTAACTTGTTTGGTGGGGAAC  | Tfrc          |
| Mm00436730_m1 | GGCAAGCCCTTTTCATTCAAGATCT  | Sos1          |
| Mm01165846_m1 | ATTCCTGAAGAGGTATGGAATATCA  | Braf          |
| Mm00468175_m1 | GAAGTATCTTCAGGATCTATTAGTG  | E2f5          |
| Mm01181822_m1 | CGGATTATCAGCATTCCAGTTCTCG  | Cdc2l6        |
| Mm01295120_m1 | CACCACTGCTGAGCTTCTACCATAC  | Tgtp          |
| Mm01226858_m1 | TACATCTGCAGAATGTTCTGAAGTT  | Gm941         |
| Mm01294180_s1 | TATGCTCGCATCTTGGGGGCTGTGC  | Olfir56       |
| Mm01258460_m1 | TTGCTAACTTCAGTGCTTATCCCTC  | Eps15         |
| Mm01304777_m1 | ATCAATACAACTCGGAAGCTCGCTC  | Pde4d         |
| Mm01263618_m1 | TAGGAGAGATGTAAGTCAAGCTAGAC | Faf1          |
| Mm01349458_m1 | AAATGAAAGTTGCCAATAGGAGGCC  | Nsd1          |
| Mm02528568_g1 | ATCCGGGGGCCTCTCTAGTGAGACT  | 9930111J21Rik |
| Mm01136809_m1 | TTGGAAAAGAAATGTCAGAGGAGCC  | Arhgap6       |
